# Supplementary material for: Utilizing a Multi-Proxy to Model Comparison to Constrain the Season and Regionally Heterogeneous Impacts of the Mt. Samalas 1257 Eruption
Source: Copernicus journal article supplement (doi:10.5194/egusphere-2023-999), 2023-05-30
Supplement: Supplementary file 1 [file egusphere-2023-999-supplement.zip]

Archive with 3 entries (3 files):
- Supplementary Document CP.pdf
- Supplementary Sheet 1.xlsx
- Supplementary Sheet 2.xlsx
