# Supplementary material for: Utilizing a Multi-Proxy to Model Comparison to Constrain the Season and Regionally Heterogeneous Impacts of the Mt. Samalas 1257 Eruption
Source: Copernicus journal article supplement (doi:10.5194/egusphere-2023-999), 2023-05-30
Supplement: Supplementary file 1 [file egusphere-2023-999-supplement.zip › Supplementary Sheet 2.xlsx]

## Sheet: README
File includes data from four tree ring-reconstructed summer surface temperature anomalies averaged for the Northern Hemisphere
1 - Wilson (2016)
Meta Data and Study Details (Timespan, Summer Definition, Lat/Long Bounds, Online Resource Links)
2 - Schneider (2015)
Meta Data and Study Details (Timespan, Summer Definition, Lat/Long Bounds, Online Resource Links)
3 - Guillet (2017)
Meta Data and Study Details (Timespan, Summer Definition, Lat/Long Bounds, Online Resource Links)
4 - Büntgen (2021)
Meta Data and Study Details (Timespan, Summer Definition, Lat/Long Bounds, Online Resource Links)
5 - Summer Temperature Anomalies
Full tree ring-reconstructed summer surface temperature anomaly dataset (750-2000)
6 - 1247 - 1262 Anomalies
Tree ring-reconstructed summer surface temperature anomaly dataset untilised in this study (1247-1262)

## Sheet: 1 - Wilson 2016
Online_Resource: https://www.ncdc.noaa.gov/paleo/study/19743
Online_Resource: http://www.sciencedirect.com/science/article/pii/S0277379115301888
Study_Name: Northern Hemisphere 1250 Year N-TREND Summer Temperature Reconstruction
Investigators: Wilson, R.; Anchukaitis, K.; Briffa, K.R.; Büntgen, U.; Cook, E.; D'Arrigo, R.; Davi, N.; Esper, J.; Frank, D.; Gunnarson, B.; Hegerl, G.; Helama, S.; Klesse, S.; Krusic, P.J.; Linderholm, H.W.; Myglan, V.; Osborn, T.J.; Rydval, M.; Schneider, L.; Schurer, A.; Wiles, G.; Zhang, P.; Zorita, E.
Description: Northern Hemisphere Tree-Ring Network Development (N-TREND) consortium 2015 Northern Hemisphere summer temperature reconstruction for AD 750-2011.
#	Northernmost_Latitude: 90.0
#	Southernmost_Latitude: 0.0
#	Easternmost_Longitude: 180.0
#	Westernmost_Longitude: -180.0
#	Collection_Name: N-TREND2015
#	Earliest_Year: 750
#	Most_Recent_Year: 2014
#	Time_Unit: AD
#	Summer: May-June-July-August (MJJA)

## Sheet: 2 - Schneider 2015
Online_Resource: https://www.ncdc.noaa.gov/paleo/study/18875
Online_Resource: http://onlinelibrary.wiley.com/wol1/doi/10.1002/2015GL063956/full
Study_Name: Northern Hemisphere Extratropics 1400 Year MXD Summer Temperature Reconstruction
Investigators: Schneider, L.; Smerdon, J.E.; Buntgen, U.; Wilson, R.J.S.; Myglan, V.S.; Kirdyanov, A.V.; Esper, J.
Description:
#	Annually resolved summer temperature reconstruction for the northern hemisphere midlatitudes.
#	The 15 proxy records are maximum-latewood-density chronologies with a minimum length of 600 years and a significant local summer temperature signal.
#	The proxy composite is scaled against June-August temperatures from the CRUTEM4v network (30-90N).
#	Northernmost_Latitude: 90.00
#	Southernmost_Latitude: 30.00
#	Easternmost_Longitude: 180.00
#	Westernmost_Longitude: -180.00
#	Collection_Name: Schneider2015NHtemp
#	Earliest_Year: 600
#	Most_Recent_Year: 2002
#	Time_Unit: AD
#	Summer: June-July-August (JJA)

## Sheet: 3 - Guillet 2017
Online_Resource: https://www.ncdc.noaa.gov/paleo/study/21090
Online_Resource: https://www.nature.com/articles/ngeo2875
Study_Name: Northern Hemisphere 1,500 Year Summer Temperature Reconstructions
Investigators: Guillet, S.; Corona, C.; Stoffel, M.; Khodri, M.; Lavigne, F.; Ortega, P.; Eckert, N.; Dkengne Sielenou, P.; Daux, V.; Churakova (Sidorova), O.V.; Davi, N.; Edouard, J.-L.; Zhang, Y.; Luckman, B.H.; Myglan, V.S.; Guiot, J.; Beniston, M.; Masson-Delmotte, V.; Oppenheimer, C.
Description: Multiproxy summer (June-August) gridded and Northern Hemisphere temperature reconstructions for the past 1,500 years w.r.t 1960-1990
#	Northernmost_Latitude: 90.0
#	Southernmost_Latitude: 0.0
#	Easternmost_Longitude: 180.0
#	Westernmost_Longitude: -180.0
#	Collection_Name: Guillet2017NHtemp
#	Earliest_Year: 500
#	Most_Recent_Year: 2000
#	Time_Unit: AD
#	Summer: June-July-August (JJA)

## Sheet: 4 - Büntgen 2021
Online_Resource: https://www.ncdc.noaa.gov/paleo/study/33215
Online_Resource: https://www.nature.com/articles/s41467-021-23627-6
Study_Name: Northern Hemisphere 2,000 Year Tree-Ring Ensemble Temperature Reconstructions
Investigators: Büntgen, U.; Allen, K.; Anchukaitis, K.J.; Arseneault, D.; Boucher, E.; Bräuning, A.; Chatterjee, S.; Cherubini, P.; Churakova (Sidorova), O.V.; Corona, C.; Gennaretti, F.; Grießinger, J.; Guillet, S.; Guiot, J.; Gunnarson, B.; Helama, S.; Hochreuther, P.; Hughes, M.K.; Huybers, P.; Kirdyanov, A.V.; Krusic, P.J.; Ludescher, J.; Meier, W.J.-H.; Myglan, V.S.; Nicolussi, K.; Oppenheim…
Description: Ensemble temperature reconstructions and tree-ring training data sets from the Northern Hemisphere over the past 2,000 years.
#	Northernmost_Latitude: 90
#	Southernmost_Latitude: 30
#	Easternmost_Longitude: 180
#	Westernmost_Longitude: -180
#	Collection_Name: Buentgen2021recon
#	Earliest_Year: 0
#	Most_Recent_Year: 2019
#	Time_Unit: Year CE
#	Summer: Varies between grouping, spans May-Oct

## Sheet: 5 - Full Data Sets
Year AD	Wilson (2016)	Schneider (2015)	Guillet (2017)	Büntgen (2021)
750	-0.279	-0.38056	-0.0895	-0.208717
751	-0.3074	-0.40339	-0.3146	-0.284409
752	-0.4209	-0.38513	0.0168	-0.499196
753	-0.1939	-0.53238	-0.3007	-0.232803
754	-0.8183	-0.51981	-0.4312	-0.301565
755	-0.3661	-0.35424	-0.0843	-0.0541066
756	-0.9005	-0.75163	-0.4874	-0.0730001
757	-0.9272	-0.50489	-0.6992	-0.286174
758	-0.3928	-0.10918	-0.0439	-0.0170688
759	-0.3661	-0.19524	-0.2433	0.0324028
760	-0.3678	-0.23292	-0.3191	-0.367059
761	-0.6092	-0.071008	-0.0327	-0.325762
762	-0.5653	-0.44812	-0.1471	-0.315049
763	-0.28	-0.18409	-0.1602	-0.00619515
764	0.0053	0.048405	0.4262	0.0986084
765	-0.0167	-0.21858	0.1787	0.0126441
766	-0.4336	-0.26871	-0.1067	-0.315128
767	-0.2361	-0.23985	0.0246	-0.202413
768	-0.2581	-0.25187	-0.0671	-0.0045229
769	-0.4117	-0.21164	0.1496	-0.275565
770	-0.4336	-0.24524	0.071	-0.348391
771	-0.2581	-0.12504	-0.1596	-0.222951
772	-0.8725	-0.63196	-0.6829	-0.534387
773	-0.8944	-0.65923	-0.7575	-0.682037
774	-0.4556	-0.20419	-0.081	-0.446657
775	-0.6531	-0.23647	-0.1646	-0.536132
776	-0.4775	-0.36587	-0.0903	-0.32369
777	-0.3458	-0.11052	-0.2276	-0.647414
778	-0.3458	-0.09584	0.0958	-0.326545
779	-0.3239	-0.047856	-0.0957	-0.509416
780	-0.7189	-0.24825	0.0363	-0.498107
781	-0.1264	0.053916	0.496	-0.394574
782	-0.3458	-0.34528	-0.0051	-0.312016
783	-0.3058	-0.27439	0.1094	-0.376638
784	-0.3708	-0.44673	-0.3085	-0.447444
785	-0.0245	0.020423	0.3141	-0.366217
786	-0.3708	-0.54783	-0.1771	-0.234156
787	0.0837	0.096679	0.1803	-0.365616
788	-0.1111	-0.10559	0.1887	-0.425469
789	-0.3924	-0.46393	-0.1511	-0.455439
790	-0.0029	-0.12113	0.1751	-0.237805
791	-0.6737	-0.50767	-0.6009	-0.619665
792	-0.0245	-0.091942	0.2288	-0.246396
793	-0.0245	0.062398	0.4919	-0.224639
794	-0.2842	-0.23724	0.1728	-0.283391
795	-0.0894	-0.067399	0.2996	-0.272609
796	-0.3708	-0.62777	-0.3056	-0.433158
797	-0.414	-0.68401	-0.5508	-0.466394
798	-0.2626	-0.40231	-0.1051	-0.32031
799	-0.6521	-0.8959	-0.6046	-0.476686
800	-0.7481	-1.3034	-1.2908	-0.919538
801	-0.3859	-0.58849	-0.5255	-0.609122
802	-0.4538	-0.41659	-0.2841	-0.718631
803	-0.4765	-0.83645	-0.552	-0.685669
804	-0.6575	-0.38439	-0.3224	-0.766258
805	-0.318	-0.76655	-0.3313	-0.750742
806	-0.2954	-0.83301	-0.5649	-0.76857
807	-0.2954	-0.73419	-0.6059	-0.830281
808	-0.0917	-0.74956	-0.265	-0.587204
809	-0.2501	-0.7185	-0.3729	-0.848782
810	-0.4538	-0.46724	-0.5349	-0.831496
811	0.0894	-0.3274	-0.1726	-0.614272
812	-0.2048	-0.32899	0.0079	-0.398423
813	0.0441	-0.1132	0.0061	-0.627579
814	-0.4085	-0.62989	-0.6237	-0.644767
815	-0.1596	-0.14791	-0.2218	-0.689688
816	-0.4085	-0.29034	-0.5489	-0.833455
817	-0.4417	0.061397	0.036	-0.766816
818	-0.3544	-0.56064	-0.6587	-0.566327
819	-0.1363	-0.42129	-0.1898	-0.536988
820	-0.2018	-0.39377	-0.2509	-0.472037
821	-0.2269	-0.67238	-0.449	-0.42342
822	0.0262	-0.29958	-0.0409	-0.493388
823	-0.5222	-0.5119	-0.0458	-0.485406
824	-0.7963	-0.84974	-0.2987	-0.472572
825	-0.4378	-0.319	-0.0771	-0.51159
826	-0.2902	-0.46383	-0.3832	-0.611345
827	-0.5693	-0.24574	-0.2504	-0.520582
828	-0.4837	-0.28879	0.1168	-0.377514
829	-0.4196	-0.1565	-0.0763	-0.628294
830	-0.3768	-0.21802	-0.1536	-0.562493
831	-0.0773	-0.52052	-0.4582	-0.702043
832	-0.056	-0.2653	-0.1789	-0.469486
833	0.051	-0.10317	0.007	-0.405604
834	-0.0346	-0.39727	0.1024	-0.314028
835	-0.0346	-0.067281	0.2631	-0.46507
836	-0.334	-0.13807	0.2901	-0.233543
837	-0.0773	0.03179	0.1397	-0.340924
838	0.0082	-0.055779	0.3073	-0.248901
839	-0.056	-0.093354	0.3243	-0.242062
840	-0.0132	-0.16016	0.3248	0.0531082
841	-0.0346	-0.54308	-0.1842	-0.106504
842	0.1365	-0.14311	-0.0714	-0.146428
843	0.1365	-0.3376	-0.0282	-0.0188036
844	0.051	-0.16236	0.1647	-0.0140174
845	-0.0346	0.0072626	0.1588	0.00288992
846	0.1365	-0.64547	-0.3997	-0.306667
847	-0.0346	-0.27013	0.1623	-0.394197
848	0.1579	-0.31196	-0.1609	-0.536412
849	-0.056	-0.24892	0.1647	-0.272862
850	0.051	-0.15798	0.2574	-0.278819
851	-0.3982	-0.45821	-0.3042	-0.543434
852	-0.3768	-0.77227	-0.7817	-0.582595
853	-0.9115	-1.0152	-0.9084	-0.445779
854	-0.7618	-0.75084	-0.6506	-0.752748
855	-0.3126	-0.49036	-0.4002	-0.80724
856	-0.7832	-0.29483	-0.3708	-0.615373
857	-0.5907	-0.57186	-0.3827	-0.603182
858	-0.4196	-0.064783	0.219	-0.738714
859	-0.3982	-0.39631	-0.4112	-0.691621
860	-0.2912	-0.079691	-0.2396	-0.978324
861	-0.1629	-0.39687	-0.2576	-0.725119
862	-0.1843	-0.28976	-0.1179	-0.56246
863	-0.2057	-0.38339	-0.1509	-0.637168
864	-0.3554	0.28501	0.3151	-0.569053
865	-0.5693	-0.33683	-0.5898	-0.760971
866	-0.2699	0.018488	0.1158	-0.597462
867	-0.5479	-0.089322	-0.4041	-0.58069
868	-0.0987	0.19317	-0.1102	-0.60561
869	-0.1201	0.19232	0.0934	-0.263179
870	-0.2057	-0.13896	-0.5037	-0.479161
871	-0.1201	0.17143	-0.3682	-0.435173
872	-0.0346	-0.33568	-0.2763	-0.215102
873	0.1152	-0.0038227	-0.1202	-0.368348
874	-0.0132	-0.089502	0.2012	-0.2394
875	-0.1843	0.32384	0.221	-0.064597
876	-0.0773	0.45981	0.2015	-0.134745
877	0.0082	0.12118	0.3975	-0.285707
878	-0.1629	-0.1195	0.2439	-0.0766625
879	-0.2699	-0.14344	0.1758	0.0553516
880	0.2007	0.39559	0.6915	-0.00733435
881	-0.0132	-0.13543	-0.2406	-0.152183
882	0.3718	0.14726	0.1264	-0.0489399
883	-0.056	-0.20808	-0.2492	-0.127631
884	-0.1629	-0.18563	-0.2672	-0.573998
885	0.1365	0.17014	0.3006	-0.215242
886	0.1365	0.22546	0.1454	-0.270467
887	-0.334	-0.28563	-0.3471	0.0013592
888	-0.7404	0.30666	0.5208	-0.273161
889	-0.4837	0.43725	0.7378	-0.350761
890	-0.2057	0.54045	0.7058	-0.248391
891	-0.0365	0.53425	0.5643	-0.0790011
892	0.179	-0.35099	-0.1811	0.000812972
893	0.3299	0.25812	0.8238	-0.236837
894	0.2652	-0.43904	-0.0564	0.184103
895	0.0066	-0.14012	-0.0345	0.0901793
896	-0.5538	-0.52529	-0.3984	-0.120879
897	-0.3598	-0.03365	0.3242	-0.0209449
898	-0.1012	0.252	0.71	-0.129257
899	-0.4892	-0.31058	-0.4872	-0.451536
900	-0.7909	-0.28869	-0.3229	-0.578399
901	-0.7047	-0.32538	-0.7453	-0.521766
902	-0.2952	-0.10498	-0.1854	-0.55565
903	-0.6185	-0.86797	-1.0013	-0.849878
904	-0.5107	-0.094316	-0.0988	-0.499274
905	-0.5969	-0.64271	-0.8191	-0.631124
906	-0.6616	-0.4332	-0.4349	-0.623136
907	-0.5107	-0.36077	-0.3637	-0.714715
908	-0.5969	0.045314	0.2411	-0.412054
909	-0.64	-0.20567	-0.3077	-0.466595
910	-0.0467	0.11112	0.2846	-0.300644
911	-0.0103	-0.52119	-0.1203	-0.38913
912	0.0261	0.032573	0.3563	-0.500203
913	-0.2832	-0.1609	0.1066	-0.510892
914	0.117	-0.14485	0.231	-0.44225
915	0.3535	0.41143	0.5835	-0.481194
916	-0.0285	-0.17366	0.0948	-0.38481
917	0.0079	-0.43716	-0.0083	-0.174723
918	0.2341	-0.25452	0.1058	-0.457567
919	0.1509	-0.072155	0.2317	-0.348242
920	-0.0655	-0.007305	0.3412	-0.408738
921	-0.0988	-0.0027465	0.3365	-0.308427
922	0.2674	0.25573	0.5965	-0.288332
923	0.0676	-0.008065	0.3848	-0.368727
924	-0.1488	-0.0085212	0.2293	-0.333639
925	-0.1654	-0.068864	0.0098	-0.39017
926	-0.1488	0.16523	0.5815	-0.203921
927	-0.3486	-0.18655	-0.0979	-0.395697
928	0.1675	0.54428	0.7226	-0.284992
929	0.1342	-0.18231	0.2194	0.0925147
930	-0.1155	-0.32719	0.1738	-0.315821
931	-0.1282	-0.037427	0.3477	-0.289253
932	-0.2276	-0.1607	0.1441	-0.282087
933	-0.3766	-0.23416	0.4244	-0.192732
934	-0.3932	-0.22513	0.0907	-0.143191
935	-0.1613	-0.41556	0.0521	-0.0963784
936	0.0208	-0.057379	0.1399	0.0828702
937	-0.1355	-0.22755	0.2742	-0.0346661
938	-0.0426	-0.25591	-0.1429	-0.180729
939	-0.1355	-0.49423	-0.1312	-0.153915
940	-0.5441	-0.91974	-0.4624	-0.579845
941	-0.1541	-0.52666	-0.134	-0.251426
942	-0.2469	-0.55928	-0.4168	-0.502636
943	-0.1726	-0.3007	-0.4713	-0.474577
944	0.3474	0.331	0.4155	-0.499669
945	-0.0984	0.07376	0.364	-0.414056
946	0.0874	-0.0070492	0.113	-0.488763
947	-0.0055	-0.6761	-0.2588	-0.57755
948	0.0317	-0.18543	0.299	-0.461922
949	0.1617	0.24338	0.6351	-0.361875
950	-0.3026	-0.16459	0.1838	-0.465865
951	-0.4698	-0.37508	-0.0137	-0.454749
952	-0.6184	-0.44419	-0.0787	-0.39627
953	-0.2841	-0.0080161	0.1366	-0.353459
954	-0.2098	-0.34021	-0.1034	-0.478138
955	0.0131	-0.35601	-0.0889	-0.441425
956	0.1988	-0.14205	-0.3315	-0.478414
957	0.2917	-0.042511	-0.0564	-0.382343
958	-0.1541	-0.3501	-0.4119	-0.65506
959	-0.0984	-0.066446	-0.387	-0.317951
960	-0.1169	-0.057338	-0.3633	-0.226512
961	-0.2841	-0.39513	-0.5873	-0.452674
962	-0.1169	0.29329	0.3185	-0.577156
963	-0.3212	-0.27034	-0.4688	-0.313568
964	0.0688	0.18785	-0.0259	-0.272853
965	-0.0055	-0.15401	-0.4152	-0.246364
966	-0.0798	-0.31687	-0.4267	-0.0663449
967	-0.1541	-0.26285	-0.4992	-0.624477
968	0.1059	-0.19313	-0.0209	-0.122008
969	-0.5627	-0.20596	-0.263	-0.355644
970	-0.3584	0.0071103	0.0551	-0.0053791
971	-0.3398	-0.030038	0.1035	-0.369262
972	-0.3026	-0.31241	-0.2591	-0.325515
973	-0.3584	-0.55251	-0.4429	-0.460025
974	-0.1355	-0.085869	-0.1548	-0.257325
975	-0.1541	-0.038124	0.1532	-0.30777
976	-0.4512	-0.62822	-0.6552	-0.540501
977	-0.0798	0.063034	-0.0097	-0.333821
978	-0.1578	-0.047404	-0.2189	-0.177448
979	-0.5088	-0.59326	-0.9312	-0.170663
980	-0.1209	0.12172	-0.0336	-0.207142
981	-0.8597	-0.21998	-0.6171	-0.175297
982	-0.3056	0.39108	0.0663	0.146842
983	-0.3795	-0.047037	-0.4664	-0.145327
984	-0.3425	-0.49292	-0.5031	-0.114941
985	-0.4164	-0.5914	-0.2208	-0.0296218
986	0.2116	0.2086	0.3008	0.193786
987	-0.2502	-0.080846	0.2718	0.0162036
988	-0.1578	-0.39154	-0.1365	-0.302517
989	-0.1763	-0.15439	-0.1129	0.0731548
990	0.0454	0.45462	0.8156	0.0366046
991	0.0823	-0.28004	0.0455	-0.112872
992	0.0084	-0.043567	0.1075	-0.311846
993	0.1193	0.10873	0.4946	-0.0758298
994	-0.01	-0.14135	0.1362	-0.278046
995	0.1193	0.16847	0.6797	-0.174152
996	-0.1393	-0.43163	-0.2231	-0.221076
997	-0.01	0.082907	0.6607	-0.349561
998	-0.2686	-0.26626	0.312	-0.308986
999	-0.6381	-0.44554	-0.3074	-0.394784
1000	-0.0285	-0.28779	-0.1965	-0.298784
1001	-0.1948	-0.21488	0.1693	-0.270022
1002	-0.1948	-0.14457	0.4127	-0.384638
1003	-0.2871	-0.72263	0.0419	-0.403302
1004	-0.2317	-0.71306	-0.4456	-0.483116
1005	0.0454	-0.28538	0.362	-0.299587
1006	-0.0285	-0.19164	0.4553	-0.450362
1007	-0.3056	-0.61889	0.0534	-0.225327
1008	-0.1763	-0.17108	0.9223	-0.0343402
1009	-0.1948	-0.028009	0.91	-0.45189
1010	-0.4534	-0.55914	0.1426	-0.238989
1011	-0.047	-0.50615	0.2267	-0.383348
1012	-0.1393	-0.69206	-0.0923	-0.372055
1013	-0.1024	-0.33048	0.181	-0.177628
1014	0.3409	-0.046777	0.4279	-0.364219
1015	0.0084	-0.34438	0.4648	-0.0774432
1016	0.1008	-0.20327	0.3623	-0.450248
1017	0.1008	-0.43591	0.0298	-0.0750984
1018	0.5441	0.017894	0.6175	-0.0998577
1019	0.1377	-0.086679	0.4004	-0.206392
1020	-0.0655	-0.056349	0.1362	-0.134515
1021	-0.2871	-0.15866	0.0112	-0.541219
1022	0.1377	0.025695	0.2311	-0.323972
1023	0.0084	-0.2869	-0.0308	-0.205824
1024	-0.1553	-0.19445	-0.1326	-0.0653157
1025	-0.1192	0.082723	0.6391	-0.29811
1026	0.043	-0.21499	0.4038	-0.0685769
1027	-0.1192	-0.31161	0.0154	-0.113787
1028	0.3134	0.27881	0.9016	-0.0412528
1029	-0.1373	-0.52495	-0.3547	-0.373056
1030	-0.1192	-0.027594	0.3546	-0.186253
1031	-0.3175	-0.18962	-0.0155	-0.0770255
1032	-0.7862	-0.76901	-1.0033	-0.398402
1033	0.043	0.26104	0.4618	-0.288554
1034	-0.1192	-0.15224	0.1017	-0.202725
1035	-0.2274	-0.41063	-0.15	-0.437106
1036	-0.2454	-0.39169	0.1249	-0.211334
1037	-0.1733	-0.16714	-0.0476	-0.285659
1038	-0.0111	-0.024281	0.4401	-0.387982
1039	0.3314	-0.23665	0.3386	-0.158661
1040	-0.1977	-0.42568	-0.0834	-0.325211
1041	-0.002	-0.15027	0.1413	-0.151394
1042	-0.1799	-0.4037	-0.4277	-0.305191
1043	0.0869	-0.17239	0.1309	-0.369419
1044	-0.2155	-0.29336	-0.0043	-0.118912
1045	-0.1266	-0.24118	0.09	-0.281735
1046	-0.2333	-0.56318	-0.5559	-0.123521
1047	-0.4823	-0.43587	-0.4537	-0.193172
1048	-0.4112	0.20849	0.0495	-0.239468
1049	-0.1977	-0.23222	0.033	-0.183803
1050	-0.2689	-0.43526	-0.3402	-0.231637
1051	-0.3578	-0.48655	-0.2667	-0.398092
1052	-0.3045	-0.037691	0.2129	-0.253028
1053	-0.0887	-0.37286	-0.0887	-0.256059
1054	-0.4143	-0.52855	-0.3056	-0.50937
1055	-0.2696	-0.80613	-0.5792	-0.358377
1056	-0.1791	-0.2829	-0.3276	-0.396999
1057	0.1826	-0.17082	0.0771	-0.281968
1058	0.0741	-0.14963	0.2153	-0.218684
1059	-0.1068	-0.095455	0.1899	-0.121448
1060	0.056	-0.21109	0.3006	-0.0358158
1061	0.2188	-0.094221	0.2374	0.206674
1062	-0.0164	-0.36231	-0.2472	-0.0591231
1063	-0.2334	-0.7837	-0.4677	-0.00742683
1064	-0.1068	0.024163	-0.015	-0.220039
1065	-0.143	-0.58316	-0.3227	-0.245939
1066	-0.1068	-0.036491	0.1428	-0.195391
1067	-0.2696	-0.3054	-0.3914	-0.37309
1068	-0.3419	-0.98818	-0.5349	-0.473929
1069	-0.3058	-0.41539	-0.3545	-0.448313
1070	0.0741	-0.44001	-0.1282	-0.208031
1071	-0.143	-0.48975	-0.7999	-0.311649
1072	0.0741	-0.47692	-0.1828	-0.268179
1073	-0.0034	-0.27777	-0.2385	-0.111273
1074	0.1165	0.051869	-0.1079	-0.502297
1075	-0.089	-0.2374	-0.0738	-0.16395
1076	-0.2602	-0.39831	-0.4815	-0.365182
1077	-0.0376	-0.85341	-0.4763	-0.510826
1078	0.0651	-0.34017	-0.0742	-0.462358
1079	0.1507	-0.065773	0.3297	-0.205626
1080	-0.0205	-0.34387	-0.0718	-0.315667
1081	0.0651	-0.18507	-0.1518	-0.0358803
1082	-0.1061	-0.49884	-0.1777	-0.236482
1083	-0.1575	-0.53005	-0.3528	-0.140214
1084	0.1336	0.041282	0.3911	-0.136395
1085	-0.0376	-0.33359	0.2166	-0.0867815
1086	0.3048	0.075726	0.6002	-0.044125
1087	-0.0718	0.36026	0.5893	-0.138903
1088	-0.1061	-0.32196	-0.0118	-0.268778
1089	0.185	-0.18993	0.1307	0.0751352
1090	0.2363	-0.0503	0.1442	0.0764344
1091	0.2192	0.077381	0.5177	0.0817517
1092	0.0994	0.20326	0.4111	-0.0150547
1093	0.1678	-0.39075	0.117	-0.0108687
1094	-0.0034	-0.26861	0.2428	-0.137984
1095	-0.1061	-0.056776	0.1798	-0.187151
1096	0.1336	-0.41389	-0.274	-0.43245
1097	0.0651	-0.10677	0.0522	-0.258039
1098	-0.2602	-0.30191	-0.1213	-0.392033
1099	-0.5855	-0.89391	-0.8805	-0.30696
1100	-0.4827	-0.46809	-0.4492	-0.354411
1101	-0.4656	-0.54916	-0.6012	-0.51754
1102	-0.2773	-0.21063	0.0651	-0.396663
1103	-0.0205	0.16439	0.3385	-0.353866
1104	-0.2088	-0.26889	-0.2603	-0.435409
1105	-0.0718	0.013365	0.1789	-0.119588
1106	0.048	0.15973	0.239	-0.0463214
1107	-0.2259	-0.50129	-0.6582	-0.212833
1108	-0.6368	-0.47268	-0.4949	-0.405174
1109	-0.8423	-1.2078	-1.2832	-0.715689
1110	-0.4314	-0.84491	-0.576	-0.746687
1111	-0.7567	-0.68937	-0.6659	-0.422635
1112	-0.4999	-0.53585	-0.6958	-0.488034
1113	-0.3115	-0.45426	-0.5063	-0.564301
1114	-0.3629	-0.63746	-0.725	-0.718316
1115	-0.5683	-0.60117	-0.5579	-0.836415
1116	-0.4314	-0.65101	-0.5771	-0.55642
1117	-0.4656	-0.75927	-0.9063	-0.700008
1118	-0.5855	-0.42484	-0.4192	-0.654973
1119	-0.5512	-0.097054	-0.2191	-0.570829
1120	-0.6882	-0.53199	-0.4666	-0.632696
1121	-0.5683	-0.33938	-0.2971	-0.92081
1122	-0.3971	-0.65179	-0.4758	-0.71433
1123	-0.0547	-0.46811	-0.243	-0.391225
1124	-0.1917	-0.55466	-0.1308	-0.45937
1125	-0.1917	-0.26627	-0.4117	-0.504085
1126	-0.5341	-0.60682	-0.4076	-0.550312
1127	-0.7224	-0.70463	-0.6921	-0.467303
1128	-0.4485	-0.29739	-0.3907	-0.57571
1129	-0.2088	-0.31643	-0.3033	-0.721957
1130	-0.5341	-0.052745	-0.0398	-0.49888
1131	-0.089	-0.22469	-0.295	-0.318277
1132	-0.2773	-0.27482	-0.4501	-0.606324
1133	-0.1746	-0.34067	-0.4638	-0.509033
1134	-0.4999	-0.32866	-0.2953	-0.422875
1135	-0.4666	-0.022928	-0.1784	-0.362404
1136	-0.5167	-0.46675	-0.4027	-0.628225
1137	-0.6169	-0.35832	-0.4747	-0.382738
1138	-0.4666	-0.20056	-0.3638	-0.445089
1139	-0.3329	-0.4486	-0.0554	-0.149862
1140	-0.5835	-0.39249	-0.1935	-0.698107
1141	-0.4833	-0.53279	-0.2071	-0.413743
1142	-0.4332	-0.055778	-0.0236	-0.288027
1143	-0.4165	-0.25043	0.0875	-0.217974
1144	-0.4332	-0.35609	-0.1267	-0.369202
1145	-0.5	-0.25613	0.1488	-0.481448
1146	-0.3496	-0.212	0.2005	-0.231983
1147	-0.3496	-0.31399	-0.0289	-0.232684
1148	-0.1993	-0.2421	-0.1545	-0.325933
1149	-0.2828	-0.13819	0.0777	-0.212377
1150	-0.4499	-0.16081	0.0172	-0.116098
1151	-0.4332	-0.4317	-0.1647	-0.563265
1152	-0.5167	-0.22402	-0.126	-0.182528
1153	-0.1826	-0.035092	0.3724	-0.161413
1154	-0.0824	-0.38873	-0.3402	-0.326066
1155	0.1014	-0.090507	0.0995	-0.196079
1156	0.1515	-0.26134	0.0825	-0.0874539
1157	0.1515	-0.35576	0.2082	-0.17612
1158	0.1348	-0.092209	0.2786	-0.266848
1159	0.1515	-0.057621	0.1301	-0.0921528
1160	0.0679	-0.38654	0.1112	0.155515
1161	-0.049	-0.10019	0.2737	0.0777082
1162	0.3352	0.088845	0.4033	0.102487
1163	0.1682	-0.088604	0.4573	-0.00917631
1164	0.2016	-0.21395	-0.0724	-0.23185
1165	0.1849	-0.0090314	0.4607	-0.0589904
1166	0.2684	-0.13981	0.3296	-0.219992
1167	0.3853	-0.13403	0.0795	-0.109731
1168	0.8029	0.33717	0.7121	0.0755626
1169	0.1682	-0.17303	0.1649	0.112987
1170	0.2016	-0.34978	-0.027	-0.0256539
1171	-0.1993	-0.60247	-0.3062	-0.532586
1172	-0.0991	-0.96009	-0.5995	-0.417628
1173	-0.2494	-0.19143	-0.035	-0.253269
1174	-0.1826	-0.50301	-0.3252	-0.424403
1175	0.2684	0.15503	0.4316	-0.211494
1176	-0.1826	-0.2842	-0.2753	-0.233472
1177	-0.2327	-0.36471	-0.5241	-0.236713
1178	-0.1659	-0.35053	-0.3688	-0.376804
1179	-0.5334	-0.47306	-0.6197	-0.501387
1180	-0.3664	-0.83814	-0.6783	-0.386976
1181	-0.3664	-0.41821	-0.7197	-0.391815
1182	-0.5	-0.41677	-0.2637	-0.398122
1183	-0.049	-0.17927	-0.1168	-0.320307
1184	0.1348	-0.27014	-0.4202	-0.301638
1185	0.2183	0.24209	0.2013	-0.131391
1186	-0.1325	-0.54811	0.047	-0.177784
1187	0.0512	-0.25927	0.2103	-0.304041
1188	-0.1158	-0.24225	-0.2853	-0.161152
1189	-0.1826	-0.57527	-0.3817	-0.376846
1190	-0.1158	-0.79272	-0.3073	-0.443308
1191	-0.216	-0.56246	-0.2916	-0.555717
1192	-0.4332	-0.59882	-0.3402	-0.278807
1193	-0.1492	-0.37615	-0.2516	-0.426958
1194	-0.2995	-0.68226	-0.3741	-0.436961
1195	-0.1492	-0.31302	0.1993	-0.262602
1196	-0.2494	-0.31418	0.1283	-0.595182
1197	-0.5501	-0.34103	0.0029	-0.368517
1198	-0.0991	0.16327	0.7195	-0.466263
1199	-0.3162	-0.05812	0.1302	-0.346029
1200	-0.51	-0.19608	0.0917	-0.474549
1201	-0.4442	-0.90612	-0.171	-0.655902
1202	-0.2302	-0.16089	0.0451	-0.553784
1203	-0.2631	0.0050668	0.1161	-0.438902
1204	-0.3948	-0.073685	0.4364	-0.672822
1205	-0.3289	-0.56738	-0.2801	-0.446688
1206	-0.3125	-0.46923	0.4209	-0.59965
1207	-0.2302	-0.49841	0.2225	-0.65854
1208	-0.1314	-0.26165	0.0698	-0.430022
1209	0.0333	-0.40297	0.0546	-0.5898
1210	0.0333	-0.18665	0.4827	-0.65957
1211	0.2144	0.0067647	0.4399	-0.2177
1212	-0.1643	-0.082077	0.3253	-0.161112
1213	-0.0984	-0.4143	0.1685	-0.468604
1214	-0.3454	-0.25909	0.6418	-0.332323
1215	-0.5594	-0.20011	0.0816	-0.546775
1216	-0.2631	-0.18722	0.3577	-0.49989
1217	-0.2466	-0.45781	0.0433	-0.544926
1218	-0.082	-0.12034	0.3718	-0.615146
1219	-0.1972	-0.33576	0.1088	-0.543096
1220	-0.3783	0.016364	0.4623	-0.490948
1221	-0.0161	0.28032	0.4532	-0.38093
1222	-0.3454	-0.42176	0.0498	-0.23188
1223	-0.5265	-0.28124	0.2479	-0.396242
1224	-0.1643	-0.056214	0.4517	-0.131482
1225	-0.6253	-0.45276	0.211	-0.114711
1226	-0.4771	0.07413	0.4082	-0.357005
1227	-0.1808	0.058646	0.7821	-0.31907
1228	-0.3783	-0.34126	0.2202	-0.270153
1229	-0.3619	-0.18728	0.2113	-0.261278
1230	-0.9381	-0.77984	-0.3911	-0.67296
1231	-0.7734	-0.67727	-0.159	-0.473159
1232	-0.7076	-0.40268	0.0013	-0.5786
1233	-0.8558	-0.40695	0.1191	-0.834707
1234	-1.0204	-0.65752	-0.2098	-0.71691
1235	-0.9216	-0.45753	-0.045	-0.582473
1236	-0.6747	-0.49689	-0.122	-0.621367
1237	-0.4771	-0.40985	0.0204	-0.675258
1238	-0.757	-0.45451	-0.3797	-0.422246
1239	-0.6253	-0.5511	-0.135	-0.48004
1240	-0.5759	-0.35758	-0.1056	-0.394292
1241	-0.543	-0.10273	0.1969	-0.466931
1242	-0.2631	-0.27474	0.0603	-0.279079
1243	-0.2466	-0.18318	0.2065	-0.338485
1244	-0.5923	-0.61561	0.0835	-0.542374
1245	-0.1808	-0.17921	0.1109	-0.330337
1246	-0.2302	-0.21521	0.4792	-0.435874
1247	-0.0326	-0.10699	0.5649	-0.390348
1248	-0.296	-0.2159	0.0903	-0.364308
1249	-0.0161	-0.07757	0.3713	-0.0688762
1250	-0.0984	-0.18663	0.518	-0.284108
1251	-0.0984	0.10722	0.3747	-0.461721
1252	-0.0161	-0.2311	0.3304	-0.371036
1253	-0.0655	-0.2305	0.2901	-0.188176
1254	-0.3619	-0.24216	0.0943	-0.517342
1255	0.1485	-0.045239	0.4487	-0.181352
1256	-0.3289	-0.55832	-0.0964	-0.490578
1257	0.1156	-0.11054	0.1401	-0.247249
1258	-0.724	-1.2033	-0.5869	-0.695844
1259	-0.7076	-0.84013	-1.0638	-0.846996
1260	-0.7301	-0.64376	-0.5263	-0.478853
1261	-0.5478	-0.40286	-0.4052	-0.435566
1262	-0.4483	-0.18201	-0.1005	-0.290618
1263	-0.7467	-0.7979	-0.2765	-0.67336
1264	-0.5146	-0.21226	0.3515	-0.578972
1265	-0.3323	-0.36051	0.2168	-0.568259
1266	-0.2329	0.0024529	0.2441	-0.330152
1267	-0.6141	-0.41159	-0.1486	-0.43091
1268	-0.5312	-0.18486	0.2795	-0.224656
1269	-0.3986	-0.14199	0.4552	-0.306152
1270	-0.5146	-0.1333	0.2782	-0.362802
1271	-0.2992	0.020937	0.6518	-0.352809
1272	-0.382	-0.26659	0.3696	-0.197347
1273	-0.4152	-0.20199	0.2089	-0.304921
1274	-0.3986	-0.15639	0.1652	-0.419437
1275	-0.5312	-0.50745	-0.0485	-0.207171
1276	-0.4152	-0.121	0.5846	-0.31956
1277	-0.5312	-0.29682	0.36	-0.4719
1278	-0.6804	-0.55127	-0.0079	-0.773101
1279	-0.4815	0.11074	0.7311	-0.257969
1280	-0.6804	-0.31153	0.2205	-0.440981
1281	-0.3489	-0.18797	0.2957	-0.348087
1282	-0.5644	-0.32255	-0.0671	-0.319953
1283	-0.4815	-0.094163	0.2359	-0.492522
1284	-0.4815	-0.065455	0.3788	-0.662946
1285	-0.6804	-0.36103	0.524	-0.575565
1286	-0.813	-0.52999	0.2763	-0.486126
1287	-0.5146	-0.58298	0.2037	-0.397372
1288	-0.9953	-0.65299	-0.1042	-0.557991
1289	-0.7467	-0.17829	0.2339	-0.579936
1290	-1.0616	-0.62918	-0.1956	-0.644779
1291	-0.813	-0.52428	-0.2685	-0.724134
1292	-0.9456	-0.54861	-0.07	-0.476273
1293	-0.8461	-0.71323	-0.4312	-0.821444
1294	-1.0616	-0.68123	-0.4447	-0.690975
1295	-0.7135	-0.19403	0.0986	-0.401151
1296	-0.7964	-0.15378	0.007	-0.495932
1297	-0.7633	-0.41521	-0.1369	-0.592237
1298	-0.7467	-0.58343	-0.3214	-0.412559
1299	-0.6141	-0.29368	-0.1292	-0.537709
1300	-0.5478	-0.36339	0.0235	-0.632511
1301	-0.3986	-0.22398	-0.1184	-0.2788
1302	-0.697	-0.20455	0.031	-0.639734
1303	-0.5312	0.049774	0.1003	-0.564915
1304	-0.4152	0.16131	0.2828	-0.367381
1305	-0.4152	-0.068572	0.1492	-0.416634
1306	-0.0837	0.2379	0.517	-0.302155
1307	-0.1997	0.079282	0.1078	-0.378525
1308	-0.2163	0.30173	0.5398	-0.18338
1309	-0.2163	0.11459	0.2038	-0.409964
1310	-0.2826	0.30363	0.3219	-0.425163
1311	-0.266	-0.12695	0.2509	-0.0562893
1312	-0.1334	-0.078605	-0.4614	-0.394323
1313	-0.0837	0.2037	0.0444	-0.102115
1314	-0.1997	-0.23717	-0.2969	-0.196514
1315	-0.034	0.32989	0.1719	-0.346839
1316	-0.0505	-0.020023	0.2412	-0.502313
1317	-0.0505	-0.055124	0.1058	-0.554283
1318	0.0821	0.19044	0.111	-0.417853
1319	-0.1831	-0.18106	-0.4615	-0.46056
1320	0.1152	0.13741	0.0507	-0.411878
1321	-0.1666	-0.11412	-0.3595	-0.171444
1322	-0.2992	-0.38636	-0.1901	-0.200855
1323	-0.382	-0.031499	-0.0864	-0.497982
1324	-0.1168	-0.024026	0.0146	-0.458215
1325	-0.0505	0.39348	0.4	-0.224864
1326	-0.2494	-0.306	-0.4079	-0.326787
1327	-0.034	0.063358	-0.3487	-0.181666
1328	-0.5253	-0.39471	-0.3108	-0.0731545
1329	-0.4264	0.0027269	-0.2032	-0.283218
1330	-0.6735	-0.64188	-0.9324	-0.728066
1331	-0.2288	-0.038407	-0.3937	-0.620963
1332	-0.377	0.10195	-0.1112	-0.812902
1333	-0.4264	0.26702	-0.0509	-0.641741
1334	-0.1134	0.14544	0.4707	-0.615507
1335	-0.5088	-0.43538	-0.0367	-0.558103
1336	-0.3111	-0.25193	-0.2048	-0.922785
1337	-0.0311	0.062305	0.0517	-0.558096
1338	-0.4759	-0.5618	-0.2182	-0.88418
1339	-0.3935	-0.3665	-0.2192	-0.42312
1340	-0.5088	-0.12503	0.3194	-0.532852
1341	-0.4759	0.021948	0.0601	-0.554423
1342	-0.6638	-0.61993	-0.4752	-0.77067
1343	-0.6313	-0.21549	0.0241	-0.470755
1344	-0.5661	-0.41471	-0.164	-0.623738
1345	-0.7127	-0.63437	-0.2486	-0.686381
1346	-0.8268	-0.79812	-0.5473	-0.834277
1347	-0.7127	-0.44846	0.0663	-0.859669
1348	-0.8757	-0.03375	-0.1774	-0.987526
1349	-0.5987	0.054168	-0.108	-0.77051
1350	-0.6638	-0.52555	-0.2798	-0.904003
1351	-0.2891	0.36576	0.3503	-0.608749
1352	-0.4357	-0.44749	-0.3841	-0.496859
1353	-0.4683	-0.019215	-0.1328	-0.538305
1354	-0.0446	0.06376	0.1309	-0.58938
1355	-0.3542	0.20294	0.2473	-0.497095
1356	-0.5498	-0.3333	0.2153	-0.293111
1357	-0.5498	-0.087563	0.2152	-0.495917
1358	-0.4031	0.058081	-0.0534	-0.541451
1359	-0.3542	-0.29423	-0.0684	-0.304188
1360	-0.3705	0.11146	-0.0753	-0.530186
1361	-0.3053	0.27065	0.0014	-0.52539
1362	-0.0446	0.46618	0.5321	-0.325868
1363	-0.4357	-0.16703	0.2896	-0.264335
1364	-0.0446	0.2027	0.449	-0.380577
1365	-0.1913	0.30909	0.3637	-0.17057
1366	-0.2891	-0.20304	-0.0033	-0.252102
1367	-0.3053	-0.24299	-0.0425	-0.249504
1368	-0.2239	-0.0064425	0.4078	-0.0908078
1369	-0.3216	0.17191	-0.1947	-0.426582
1370	-0.5987	-0.24249	-0.1272	-0.519563
1371	-0.2076	-0.37481	0.2095	-0.319233
1372	-0.4683	-0.27744	-0.1786	-0.568258
1373	-0.6645	-0.013806	-0.0093	-0.432168
1374	-0.0343	0.24169	0.2285	-0.275098
1375	-0.4439	0.23594	0.1327	-0.349701
1376	-0.3494	0.21631	-0.0691	-0.396756
1377	-0.2706	-0.33166	-0.5028	-0.489504
1378	-0.4124	-0.29617	-0.4819	-0.394626
1379	-0.3809	0.076279	-0.0089	-0.404654
1380	-0.4282	-0.15819	-0.2767	-0.259854
1381	-0.2864	-0.043601	0.0522	-0.459597
1382	-0.2391	-0.033796	-0.0314	-0.534896
1383	-0.3494	-0.12985	0.1319	-0.477052
1384	-0.3967	0.27667	0.3715	-0.412941
1385	-0.3336	0.38668	0.3165	-0.321676
1386	-0.4597	0.20577	0.4489	-0.349215
1387	-0.3336	-0.07055	-0.0194	-0.437929
1388	-0.4124	-0.19093	-0.5619	-0.313468
1389	-0.6172	-0.12496	-0.4924	-0.440651
1390	-0.3179	-0.081868	-0.3504	-0.395478
1391	-0.3651	-0.29256	-0.1692	-0.303906
1392	-0.3967	-0.29421	-0.3042	-0.580316
1393	-0.2706	-0.084332	-0.3905	-0.626094
1394	-0.4124	-0.088092	-0.1341	-0.389849
1395	-0.2706	0.034806	-0.3303	-0.328409
1396	-0.2667	0.035625	-0.0979	-0.429394
1397	-0.189	0.20238	0.0462	-0.435679
1398	-0.189	0.31898	0.1004	-0.490615
1399	-0.3755	0.083003	0.0562	-0.424509
1400	-0.1268	0.64334	0.2285	-0.420047
1401	-0.3133	0.39102	-0.0189	-0.398458
1402	-0.0647	0.11706	0.071	-0.437887
1403	-0.1735	0.22609	0.1643	-0.104135
1404	-0.2667	0.1189	-0.0141	-0.069975
1405	-0.3444	-0.030527	0.0613	-0.105854
1406	-0.0025	0.55696	0.4071	-0.0699364
1407	-0.2823	0.14114	0.3227	-0.0830702
1408	0.0286	0.47874	0.1237	-0.140477
1409	-0.0647	0.28972	0.4375	0.0590817
1410	-0.4688	-0.14205	-0.3267	-0.178129
1411	-0.0958	0.20452	0.1156	-0.0668581
1412	-0.36	0.1024	0.1105	-0.187014
1413	-0.2667	0.299	0.4596	-0.0182783
1414	-0.6242	-0.32631	-0.0248	-0.381412
1415	-0.2667	-0.0053764	0.2136	-0.188597
1416	-0.3444	-0.15702	-0.3988	-0.1516
1417	-0.5776	-0.076383	-0.1591	-0.0594453
1418	-0.4066	0.53014	0.3871	-0.0902311
1419	-0.6397	-0.19289	-0.1614	-0.150819
1420	-0.4066	0.22279	0.1038	-0.2733
1421	-0.2356	0.16908	0.1657	-0.272008
1422	-0.4998	0.1129	0.2671	-0.294075
1423	-0.5309	-0.33185	-0.4055	-0.179496
1424	-0.1268	0.23769	0.2261	0.0353145
1425	0.1995	0.28061	0.2673	0.0504813
1426	-0.0958	-0.42454	-0.4149	-0.171803
1427	0.2306	0.20671	-0.1787	-0.196689
1428	0.1685	0.19441	0.0217	-0.0518665
1429	-0.1579	-0.030646	-0.0596	-0.290526
1430	0.2151	0.33002	0.0614	-0.184575
1431	0.4171	0.36688	0.2969	0.0472442
1432	0.4482	0.53131	0.1375	0.0312114
1433	0.013	0.035802	-0.2013	-0.129224
1434	0.2617	0.55085	0.3555	-0.0827597
1435	-0.1268	0.052866	0.0879	-0.148533
1436	0.013	0.10186	0.209	-0.212451
1437	0.0286	0.26374	-0.0819	-0.13791
1438	-0.2045	-0.31134	-0.0173	-0.350294
1439	0.013	0.13219	-0.2727	-0.16523
1440	-0.3133	-0.3051	-0.3845	-0.0627622
1441	-0.4066	0.088618	-0.0505	-0.365693
1442	-0.3133	0.0085638	-0.1598	-0.172699
1443	0.0907	0.19012	-0.0937	0.0350177
1444	-0.4377	-0.11462	-0.0702	-0.414273
1445	-0.1579	0.044066	0.0199	-0.0979594
1446	-0.2978	-0.17894	-0.2153	-0.529077
1447	-0.0958	0.14068	0.0586	-0.203633
1448	-0.36	-0.37546	0.1227	-0.456314
1449	-0.4221	-0.52089	-0.2256	-0.486399
1450	-0.4998	-0.21866	-0.6602	-0.428306
1451	-0.5776	-0.10269	-0.1956	-0.585761
1452	-0.3911	0.040655	0.04	-0.45227
1453	-1.3546	-1.3389	-1.3814	-0.793945
1454	-0.9039	-0.2906	-0.4504	-0.749071
1455	-0.9661	-0.62707	-0.783	-0.746336
1456	-0.8262	-0.3236	-0.5354	-0.790982
1457	-1.1526	-0.55441	-0.7902	-0.814293
1458	-0.8573	-0.24454	-0.5232	-0.83469
1459	-1.0904	-0.57137	-1.1714	-0.997104
1460	-0.6863	-0.23285	-0.447	-0.87347
1461	-0.7951	-0.086528	-0.4091	-0.665792
1462	-0.8884	-0.17923	-0.4289	-0.934035
1463	-1.0749	-0.68481	-1.1024	-0.876961
1464	-0.7796	0.15405	-0.4629	-0.8908
1465	-0.8728	-0.18407	-0.4714	-0.849145
1466	-1.2459	-0.73325	-0.7637	-0.955117
1467	-0.9661	0.055551	-0.2625	-1.00012
1468	-0.9661	-0.13312	-0.5806	-1.08874
1469	-0.9816	-0.075129	-0.7129	-0.744738
1470	-0.9816	-0.28871	-0.6555	-0.769609
1471	-0.8107	0.11525	-0.2584	-0.730444
1472	-0.7951	-0.035602	-0.5129	-0.784415
1473	-0.5465	0.46771	-0.0492	-0.783541
1474	-0.6708	-0.45255	-0.5728	-0.679571
1475	-0.3444	-0.19446	0.0277	-0.681348
1476	-0.4377	-0.36597	-0.3561	-0.29294
1477	-0.8728	-0.18889	-0.2839	-0.630903
1478	-0.4532	0.2512	0.1245	-0.470688
1479	-0.2823	0.36448	0.1187	-0.549331
1480	-0.7641	-0.14932	0.1531	-0.426897
1481	-0.6708	-0.66598	-0.6546	-0.633504
1482	-0.3133	0.1297	0.1121	-0.427115
1483	-0.5309	-0.50684	-0.6962	-0.51682
1484	-0.3289	0.038847	0.0189	-0.405834
1485	-0.189	-0.10084	-0.1655	-0.329282
1486	-0.3911	0.088839	0.3407	-0.316317
1487	-0.4377	-0.34439	0.1252	-0.360753
1488	-0.4221	0.0046697	0.1941	-0.354914
1489	-0.189	-0.050082	-0.063	-0.173305
1490	-0.2045	0.065661	0.3949	-0.0558084
1491	-0.6242	-0.29935	0.0259	-0.364772
1492	-0.6729	-0.21894	0.1077	-0.503283
1493	-0.3676	0.048019	-0.1176	-0.454703
1494	-0.3982	0.065893	0.1046	-0.427932
1495	-0.7493	-0.33552	-0.4682	-0.535202
1496	-0.5356	-0.22055	0.0391	-0.284278
1497	-0.4898	-0.23589	-0.5126	-0.474669
1498	-0.5203	-0.29795	-0.5332	-0.449746
1499	0.243	0.47927	0.1512	-0.291204
1500	-0.276	-0.26515	-0.0993	-0.298812
1501	-0.3066	-0.034886	0.1361	-0.18019
1502	-0.1234	-0.22933	-0.0956	-0.321841
1503	-0.3829	-0.23147	-0.191	-0.339494
1504	-0.0929	0.065937	-0.2476	-0.154864
1505	-0.2913	-0.27774	-0.3198	-0.226197
1506	-0.2608	0.00038892	0.0747	-0.170152
1507	-0.3371	0.041616	-0.0972	-0.11928
1508	-0.444	-0.22365	0.1488	-0.206867
1509	-0.5813	-0.27561	-0.2767	-0.304967
1510	-0.0645	0.21886	0.0123	-0.0811498
1511	-0.2703	-0.046609	0.0333	-0.290841
1512	-0.4027	0.013575	0.2086	-0.082525
1513	-0.4321	-0.0080636	0.0871	-0.300109
1514	-0.5644	-0.19449	0.2884	-0.279948
1515	-0.5644	-0.12182	0.1451	-0.54967
1516	-0.7261	-0.57531	-0.4868	-0.363164
1517	-0.2409	-0.0081618	0.327	-0.064636
1518	-0.4468	-0.056192	0.3367	-0.340764
1519	-0.3145	0.40692	0.8639	-0.186795
1520	-0.4174	-0.095279	0.1088	-0.226787
1521	-0.1225	0.31028	0.3511	-0.525649
1522	-0.4489	-0.3688	-0.3814	-0.455548
1523	-0.5082	-0.43724	-0.2538	-0.543464
1524	-0.5675	-0.39584	-0.432	-0.578683
1525	-0.256	-0.12114	-0.0561	-0.238386
1526	-0.5527	-0.17634	-0.1196	-0.401578
1527	-0.1373	-0.30709	-0.2624	-0.235386
1528	-0.2857	-0.10024	0.0065	-0.51693
1529	0.0703	0.079879	0.0574	-0.583712
1530	-0.0483	0.084762	0.1548	-0.398432
1531	-0.167	-0.32367	-0.0919	-0.342069
1532	-0.3005	-0.35891	-0.1944	-0.108672
1533	-0.1225	-0.33335	-0.0325	-0.478223
1534	-0.256	-0.0066894	-0.0456	-0.497115
1535	-0.2708	-0.3671	-0.0732	-0.240048
1536	-0.0038	0.085229	-0.0369	-0.26423
1537	-0.256	-0.26165	-0.0324	-0.360045
1538	-0.5082	-0.31199	-0.4005	-0.393772
1539	-0.1373	0.020107	-0.0614	0.0830425
1540	0.011	-0.014701	-0.0014	-0.047977
1541	-0.1818	-0.16238	-0.0762	-0.45021
1542	-0.7604	-0.89117	-0.7289	-0.622305
1543	-0.1818	-0.35202	-0.4832	-0.477278
1544	-0.3895	-0.28571	-0.3304	-0.404883
1545	-0.1522	-0.036599	-0.3564	-0.319273
1546	-0.3747	-0.20536	-0.5713	-0.479918
1547	-0.167	-0.018369	-0.1981	-0.4009
1548	-0.3153	-0.40303	-0.5955	-0.118053
1549	-0.5527	-0.34867	-0.5428	-0.357103
1550	-0.2857	-0.05649	-0.6248	-0.264334
1551	-0.0161	0.10217	-0.1509	-0.250464
1552	-0.1806	0.0097098	-0.4879	-0.187768
1553	-0.4797	-0.23093	-0.3956	-0.236058
1554	-0.5096	-0.26203	-0.7306	-0.39928
1555	-0.3451	-0.10598	-0.3037	-0.303089
1556	-0.5096	0.025057	-0.2744	-0.334391
1557	-0.375	-0.1829	-0.6578	-0.315419
1558	-0.061	0.14562	0.0448	-0.325511
1559	-0.2404	-0.069378	-0.4088	-0.461895
1560	-0.031	-0.081955	-0.3562	-0.324708
1561	0.0886	-0.1239	0.0382	-0.0249163
1562	-0.1208	0.037418	-0.0461	-0.0958246
1563	-0.5395	-0.047464	-0.0455	-0.0241324
1564	-0.1507	0.11762	-0.0883	-0.106247
1565	-0.1507	0.28799	0.0861	-0.110093
1566	-0.3301	0.14668	-0.1148	-0.168258
1567	-0.4348	0.15267	0.0385	-0.143157
1568	-0.5395	-0.63612	-0.0008	-0.0848651
1569	-0.7339	-0.69121	-0.3673	-0.234656
1570	-0.2255	-0.13541	-0.1993	-0.265232
1571	-0.5844	-0.4009	-0.5977	-0.445262
1572	-0.6591	-0.37386	-0.2519	-0.364254
1573	-0.5993	-0.70373	-0.5824	-0.293936
1574	-0.2255	-0.35286	0.0544	-0.245416
1575	-0.0161	-0.022392	0.0028	0.0167284
1576	-0.4797	-0.51808	-0.0006	-0.435834
1577	-0.5096	-0.34996	-0.3982	-0.272498
1578	-0.6442	-0.33021	-0.0275	-0.733407
1579	-0.5395	-0.3953	-0.1188	-0.714865
1580	-0.5993	-0.51886	-0.4187	-0.718403
1581	-0.5245	-0.63051	-0.5193	-0.684906
1582	-0.4498	-0.21689	-0.1324	-0.532494
1583	-0.1806	0.13156	0.1422	-0.339182
1584	-0.2255	0.036138	-0.3902	-0.506993
1585	-0.689	-0.97074	-0.8334	-0.669662
1586	-0.1806	-0.33673	-0.2665	-0.335703
1587	-0.7489	-0.72624	-0.5767	-0.381431
1588	-0.5096	-0.3459	-0.1734	-0.515498
1589	-0.7937	-0.79076	-0.9347	-0.805451
1590	-0.7489	-0.38817	-0.5407	-0.651307
1591	-0.5545	-0.26313	-0.1497	-0.727001
1592	-0.6143	-0.60325	-0.3559	-0.371261
1593	-1.0328	-1.0572	-0.9183	-0.680003
1594	-0.4141	-0.7169	-0.4696	-0.303987
1595	-0.6405	-0.24971	-0.1957	-0.696786
1596	-0.6556	-0.3781	-0.3566	-0.69209
1597	-0.7612	-0.58056	-0.2577	-0.707759
1598	-0.3839	-0.22549	-0.3588	-0.560742
1599	-0.2934	-0.066992	-0.1369	-0.378043
1600	-0.6834	-0.58884	-0.4796	-0.706282
1601	-1.4766	-1.6485	-1.5881	-1.20711
1602	-0.8303	-0.35157	-0.6308	-1.22491
1603	-0.8156	-0.66487	-0.3855	-0.726351
1604	-0.9037	-0.5735	-0.4219	-0.721115
1605	-1.0066	-0.70252	-0.633	-0.982186
1606	-1.0213	-0.52724	-0.3729	-0.935075
1607	-0.4925	-0.16503	-0.189	-0.852533
1608	-0.6981	-0.56485	-0.3184	-0.728102
1609	-0.7569	-0.77873	-0.4498	-0.928027
1610	-0.2281	-0.046745	-0.1325	-0.796653
1611	-0.5072	-0.36531	-0.2093	-0.671132
1612	-0.1253	-0.13969	0.0413	-0.542185
1613	-0.2721	-0.24621	0.0332	-0.598375
1614	-0.3309	-0.66691	-0.3361	-0.451827
1615	-0.3162	-0.24735	-0.0524	-0.681214
1616	0.2713	-0.45641	-0.2335	-0.397528
1617	-0.1546	-0.33505	-0.3748	-0.505609
1618	-0.1253	-0.31541	0.0881	-0.692555
1619	-0.5218	-0.34079	0.0351	-0.720965
1620	-0.5218	-0.43729	0.0104	-0.626623
1621	-0.2281	-0.17553	0.3041	-0.391866
1622	-0.1987	-0.36929	0.3472	-0.711168
1623	-0.7275	-0.48545	-0.3272	-0.606811
1624	-0.6687	-0.68718	-0.1604	-0.648223
1625	-0.3897	-0.61018	-0.1405	-0.35561
1626	-0.0812	-0.19592	0.1046	-0.418691
1627	-0.5365	-0.64944	-0.1558	-0.425889
1628	-0.4631	-0.64819	-0.3519	-0.642598
1629	-0.4043	-0.83359	-0.2784	-0.129024
1630	-0.5659	-0.65008	-0.353	-0.460978
1631	-0.654	-0.80987	-0.6401	-0.645426
1632	-0.4337	-0.66124	-0.6306	-0.687632
1633	-0.4925	-0.5357	-0.7026	-0.649163
1634	-0.5659	-1.0197	-0.5538	-0.475191
1635	-0.1987	-0.18085	-0.3982	-0.477748
1636	-0.0371	-0.25901	-0.1856	-0.391992
1637	-0.1253	-0.19267	-0.1239	-0.139559
1638	-0.3464	-0.5346	-0.3407	-0.323161
1639	-0.2131	-0.6069	-0.857	-0.509293
1640	-0.0377	-0.38957	-0.2495	-0.0965375
1641	-1.2821	-1.4104	-1.1637	-0.872178
1642	-1.1578	-0.98107	-0.7584	-1.12128
1643	-1.3065	-1.2616	-1.0133	-0.755409
1644	-0.8753	-0.75131	-0.6441	-0.998702
1645	-0.682	-0.47252	-0.228	-0.924086
1646	-0.9496	-0.62931	-0.595	-0.826018
1647	-0.6523	-0.50534	-0.4199	-1.05983
1648	-0.34	-0.20567	0.0396	-0.772222
1649	-0.6969	-0.9236	-0.516	-0.60056
1650	-0.3252	-0.19248	-0.1559	-0.682924
1651	-0.5928	-0.50649	-0.3641	-0.591318
1652	-0.5482	-0.4817	-0.7571	-0.598261
1653	-0.6077	-0.22027	-0.1644	-0.406929
1654	-0.5482	-0.90598	-0.4588	-0.394027
1655	-0.2954	-0.61902	-0.448	-0.299107
1656	-0.1021	-0.50267	-0.2455	-0.186178
1657	-0.2211	-0.17623	-0.188	-0.30799
1658	-0.4292	-0.23605	-0.1756	-0.182243
1659	-0.0724	-0.024038	-0.1008	-0.0438562
1660	-0.0278	0.20425	0.2587	-0.158354
1661	-0.2954	-0.20607	-0.2719	-0.102406
1662	-0.2805	-0.40079	-0.4709	-0.311147
1663	-0.5779	-0.5706	-0.7169	-0.414524
1664	-0.3549	-0.13915	0.0428	-0.0219479
1665	-0.5482	-0.0069368	-0.1588	-0.127198
1666	-0.4144	-0.084232	-0.0716	-0.15378
1667	-0.7861	-0.64792	-0.7924	-0.358202
1668	-0.6077	-0.29334	-0.501	-0.466532
1669	-0.4144	-0.089611	-0.5474	-0.504896
1670	-0.7861	-0.57975	-0.3297	-0.545235
1671	-0.6523	-0.19173	0.1086	-0.297186
1672	-0.4887	0.092816	0.1324	-0.374942
1673	-0.4738	-0.25545	-0.553	-0.466299
1674	-0.7564	-0.94739	-0.627	-0.493417
1675	-0.5928	-0.45659	-0.5877	-0.910079
1676	-0.7415	-0.71546	-0.276	-0.624081
1677	-1.0091	-1.0358	-1.0586	-0.913182
1678	-0.5779	-0.36431	-0.2617	-0.611801
1679	-0.7564	-0.71179	-0.752	-0.774696
1680	-0.5333	-0.19765	-0.3477	-0.84398
1681	-0.3846	-0.15666	-0.0066	-0.912667
1682	-0.5036	-0.28307	-0.2483	-0.540469
1683	-0.5036	-0.25978	-0.3148	-0.46888
1684	-0.3003	-0.35665	-0.0002	-0.449688
1685	-0.5744	-0.58705	-0.4751	-0.525288
1686	-0.4374	-0.33357	-0.3431	-0.389882
1687	-0.3765	-0.22699	-0.2953	-0.264145
1688	-0.483	-0.3846	-0.4616	-0.538108
1689	-0.119	-0.047457	0.0926	-0.298197
1690	-0.3478	-0.43029	-0.321	-0.424071
1691	-0.0885	-0.077374	-0.1	-0.282141
1692	-0.4392	-0.19304	-0.2049	-0.364204
1693	-0.1343	-0.41551	-0.2784	-0.123236
1694	-0.4392	-0.42274	-0.1717	-0.210244
1695	-0.9272	-0.82423	-0.9503	-0.399237
1696	-0.6222	-0.53325	-0.5398	-0.821321
1697	-0.912	-0.70503	-0.9743	-0.603591
1698	-1.3695	-1.2967	-0.8829	-0.871794
1699	-1.4457	-1.4908	-1.4982	-1.03255
1700	-1.1407	-0.42544	-0.3505	-0.928663
1701	-1.0797	-0.7074	-0.6366	-0.767009
1702	-0.8967	-0.55811	-0.443	-0.816704
1703	-0.5307	0.040996	0.1012	-0.758302
1704	-0.5002	0.172	-0.2293	-0.74112
1705	-0.8205	-0.23435	-0.4471	-0.784279
1706	-0.5612	-0.29986	-0.3938	-0.638827
1707	-0.2563	0.073669	0.1682	-0.291926
1708	-0.5002	-0.13072	-0.3512	-0.578024
1709	-0.7747	-0.70537	-0.6334	-0.455375
1710	-0.63	-0.22104	-0.2789	-0.416605
1711	-0.6926	-0.58716	-0.2685	-0.432499
1712	-0.5988	-0.37996	-0.3541	-0.325907
1713	-0.4424	-0.0024747	-0.0626	-0.379782
1714	-0.8645	-0.67094	-0.3503	-0.513633
1715	-0.4424	0.055905	0.2172	-0.225311
1716	-0.8645	-0.40665	-0.196	-0.302041
1717	-0.8645	-0.53931	-0.5043	-0.560919
1718	-0.7551	-0.37804	-0.1529	-0.583526
1719	-0.63	-0.16806	0.2215	-0.303694
1720	-0.2392	0.02309	0.4001	-0.346819
1721	-0.5519	-0.22539	-0.3097	-0.389963
1722	-0.2236	0.26132	0.3279	-0.372524
1723	-0.505	-0.28333	0.0138	-0.549855
1724	-0.4268	0.060242	0.4164	-0.307043
1725	-0.2079	-0.18551	0.3343	-0.300637
1726	-0.3643	-0.028829	0.2552	-0.286449
1727	-0.2548	-0.015867	0.0988	-0.0967279
1728	-0.3643	-0.049944	0.2488	-0.40223
1729	-0.1141	-0.41812	-0.0037	-0.0714246
1730	-0.5206	-0.60309	-0.1759	-0.382764
1731	-0.5831	-0.44941	-0.2643	-0.246088
1732	-0.4581	-0.49832	-0.1989	-0.339561
1733	-0.3955	-0.31585	0.0233	-0.342461
1734	-0.2079	-0.16906	0.312	-0.284018
1735	-0.505	-0.40306	-0.1829	-0.584563
1736	-0.3643	-0.19362	0.4023	-0.30902
1737	-0.4112	-0.15427	0.2236	-0.297238
1738	-0.6926	-0.66602	-0.241	-0.355522
1739	-0.2548	-0.28518	0.313	0.146485
1740	-0.5675	-0.31707	0.1744	-0.220541
1741	-0.6613	-0.53532	-0.1322	-0.320289
1742	-0.63	-0.68374	-0.2358	-0.322736
1743	-0.5206	-0.27619	0.0271	-0.333441
1744	-0.6769	-0.50072	-0.3327	-0.358624
1745	-0.5675	-0.7297	-0.4844	-0.379684
1746	-0.7863	-0.49452	-0.4701	-0.381231
1747	-0.6926	-0.28778	-0.239	-0.387208
1748	-0.4424	-0.023415	0.3497	-0.257294
1749	-0.6613	-0.58716	-0.3334	-0.455596
1750	-0.5988	-0.095009	0.0648	-0.585209
1751	-0.5831	-0.36495	-0.0041	-0.388728
1752	-0.4268	-0.37976	0.2679	-0.420067
1753	-0.5831	-0.088322	0.0758	-0.453243
1754	-0.3017	0.044752	0.3417	-0.224775
1755	-0.6457	-0.25991	-0.0562	-0.210661
1756	-0.4112	-0.10796	-0.0658	-0.215695
1757	-0.4893	-0.41179	-0.0131	0.14881
1758	-0.4424	-0.26432	-0.1517	-0.175166
1759	-0.505	-0.36619	0.4336	-0.250675
1760	-0.3017	-0.10508	0.2355	-0.0894779
1761	-0.333	-0.16292	0.4622	-0.0929208
1762	-0.2861	0.14057	0.3716	-0.196188
1763	-0.0672	-0.16667	0.0726	-0.0066855
1764	-0.4893	-0.48414	-0.1768	-0.339925
1765	-0.5362	-0.21974	-0.0208	-0.241598
1766	-0.2392	-0.091677	0.0469	-0.173804
1767	-0.4268	-0.3696	-0.1779	-0.0671064
1768	-0.5206	-0.27656	-0.2171	-0.562596
1769	-0.3486	-0.69447	-0.5037	-0.390696
1770	-0.4893	-0.6093	-0.6394	-0.777205
1771	-0.3486	-0.34994	-0.2403	-0.452448
1772	-0.6457	-0.5657	-0.0328	-0.584602
1773	-0.1767	0.0096727	0.4866	-0.423436
1774	-0.3174	-0.25832	0.1894	-0.245212
1775	-0.3017	-0.41033	0.0706	-0.112569
1776	-0.4424	-0.59044	-0.1898	-0.397863
1777	-0.1767	-0.30323	-0.1917	-0.20856
1778	-0.3955	-0.37249	0.0576	-0.0231552
1779	-0.3174	-0.21243	0.1872	-0.267285
1780	-0.5362	-0.37119	-0.1981	-0.100754
1781	-0.2392	-0.076748	0.3047	-0.0441275
1782	-0.3799	-0.40497	-0.1146	-0.0482801
1783	-1.1615	-1.4039	-1.2576	-0.417327
1784	-0.7238	-0.76606	-0.6373	-0.135129
1785	-0.5519	-0.61618	-0.4103	-0.0591419
1786	-0.6144	-0.76793	-0.3879	-0.176976
1787	-0.5831	-0.72393	-0.5546	-0.117053
1788	-0.6926	-0.51829	-0.1598	-0.381273
1789	-0.5988	-0.43834	-0.4572	-0.230153
1790	-0.5988	-0.71942	-0.485	-0.263438
1791	-0.505	-0.28278	0.0328	-0.230529
1792	-0.3799	-0.38955	-0.5022	-0.285927
1793	-0.3799	-0.15324	-0.0493	-0.370274
1794	-0.3486	-0.16446	-0.2144	-0.298139
1795	-0.3955	-0.30075	0.019	-0.319476
1796	-0.1454	0.003786	0.4806	-0.227577
1797	-0.3017	-0.53703	-0.3624	-0.162314
1798	-0.0516	-0.04399	0.3053	-0.0318081
1799	-0.3486	-0.35763	0.1903	-0.17147
1800	-0.63	-0.56065	0.0071	-0.475031
1801	-0.3799	-0.40101	-0.0665	-0.376974
1802	-0.2861	-0.21414	0.3273	-0.140881
1803	-0.333	-0.14357	0.5241	-0.163933
1804	-0.0203	-0.26186	0.0764	-0.322648
1805	-0.1141	-0.24309	0.3064	-0.128701
1806	-0.1298	-0.60348	-0.0706	-0.409627
1807	-0.2236	-0.10246	0.6162	-0.249895
1808	-0.0203	0.0085548	0.3409	-0.140267
1809	-0.4581	-0.54666	-0.3282	-0.407027
1810	-0.4737	-0.49544	-0.5398	-0.605276
1811	-0.3955	-0.51128	-0.1237	-0.33185
1812	-0.8801	-0.75532	-0.7492	-0.85217
1813	-0.9583	-0.95678	-0.8642	-0.98287
1814	-0.8958	-0.60227	-0.688	-0.847078
1815	-0.8645	-0.85485	-0.8047	-0.947397
1816	-1.3804	-1.1466	-1.4794	-1.02079
1817	-1.271	-0.99399	-0.787	-0.917285
1818	-1.0521	-0.89173	-0.6983	-1.03465
1819	-1.1928	-0.90589	-0.791	-1.04084
1820	-0.8332	-0.46789	-0.532	-1.07039
1821	-0.9739	-0.58376	-0.5697	-0.950128
1822	-0.5362	-0.24954	-0.0148	-0.817459
1823	-0.6144	-0.094688	0.051	-0.636144
1824	-0.7395	-0.30693	-0.0728	-0.634939
1825	-0.802	-0.64777	-0.4361	-0.7625
1826	-0.4737	-0.1639	0.0241	-0.439166
1827	-0.9114	-0.48737	-0.1546	-0.39968
1828	-0.2236	-0.22255	-0.0166	-0.39823
1829	-0.505	-0.42432	-0.1756	-0.415914
1830	-0.3955	-0.31374	0.0558	-0.472099
1831	-0.6144	-0.34867	-0.2238	-0.32361
1832	-1.1146	-0.92782	-0.6271	-0.574242
1833	-1.0365	-1.188	-0.9842	-0.630377
1834	-0.5831	-0.50417	-0.3055	-0.408731
1835	-1.1615	-0.78135	-1.0586	-0.678601
1836	-1.4273	-0.85874	-0.9409	-0.839836
1837	-1.099	-0.70122	-0.6755	-1.05715
1838	-1.0208	-0.56782	-0.6902	-0.936659
1839	-0.8489	-0.53556	-0.3136	-0.678516
1840	-0.7707	-0.1828	-0.0236	-0.84937
1841	-0.9114	-0.33082	-0.2686	-0.770857
1842	-0.8176	-0.38311	-0.3985	-0.681281
1843	-0.9583	-0.4745	-0.819	-0.873432
1844	-0.7551	-0.23553	-0.162	-0.600566
1845	-0.63	-0.42583	-0.2138	-0.363486
1846	-0.1141	0.36184	0.3946	-0.237723
1847	-0.6613	-0.45648	-0.1565	-0.392176
1848	-0.3955	-0.30154	-0.1933	-0.345297
1849	-0.8645	-0.30983	0.0759	-0.372242
1850	-0.7395	-0.30938	-0.0947	-0.471203
1851	-0.7551	-0.28325	0.0286	-0.533227
1852	-0.5206	-0.33482	-0.0279	-0.340412
1853	-0.5362	-0.14277	0.2655	-0.271064
1854	-0.7707	-0.3853	-0.055	-0.303657
1855	-0.7238	-0.90404	-0.3737	-0.509278
1856	-0.802	-0.50465	-0.2214	-0.432097
1857	-0.8332	-0.59851	-0.5071	-0.678796
1858	-0.3799	-0.15908	0.208	-0.272529
1859	-0.5988	-0.2287	0.022	-0.35919
1860	-0.5675	-0.54624	-0.3417	-0.207417
1861	-0.333	0.089322	0.4821	-0.0646279
1862	-0.6613	-0.76848	-0.264	-0.255605
1863	-0.5831	-0.45318	-0.0993	-0.357975
1864	-0.7395	-0.37086	-0.0396	-0.132385
1865	-0.7082	-0.18143	-0.1223	-0.385547
1866	-0.6926	-0.39569	-0.1872	-0.191644
1867	-0.8176	-0.57824	-0.2921	-0.324038
1868	-0.4581	-0.12397	0.2136	-0.210722
1869	-0.7551	-0.39368	-0.0724	-0.324021
1870	-0.6144	-0.43298	0.1521	-0.109088
1871	-0.7863	-0.6429	-0.0696	-0.325873
1872	-0.5362	-0.49249	-0.1233	-0.240702
1873	-0.4112	-0.25979	0.2691	-0.034211
1874	-0.6144	-0.28434	0.2087	-0.157693
1875	-0.4112	0.13991	0.4824	-0.144001
1876	-0.5362	-0.388	-0.2305	-0.141617
1877	-0.3174	0.046513	0.3308	0.0449895
1878	0.0734	0.40793	0.548	0.0184409
1879	-0.2079	-0.18096	0.1827	-0.145731
1880	-0.2548	-0.3135	0.0168	-0.179909
1881	-0.3799	-0.38071	-0.0166	-0.251724
1882	-0.1923	-0.48301	-0.0669	-0.340683
1883	-0.4581	-0.54226	-0.3542	-0.251598
1884	-0.8645	-1.1639	-0.702	-0.598737
1885	-0.4424	-0.79264	-0.016	-0.471289
1886	-0.0985	-0.2609	0.0152	-0.3704
1887	-0.6613	-0.53666	0.0319	-0.276282
1888	-0.6144	-0.42364	-0.2994	-0.412832
1889	-0.2236	-0.1588	0.058	-0.30367
1890	-0.4581	-0.327	-0.0179	-0.263715
1891	-0.3799	-0.4932	-0.1948	-0.31103
1892	-0.4581	-0.29114	-0.0937	-0.346464
1893	-0.4424	-0.11999	0.1976	-0.351387
1894	-0.3486	-0.19294	0.0681	-0.323631
1895	-0.0672	-0.049008	0.1902	-0.204773
1896	-0.3017	-0.20747	0.0936	-0.182959
1897	-0.0516	0.065263	0.3535	-0.104315
1898	-0.2236	-0.017368	0.2739	-0.0477099
1899	-0.4737	-0.58607	-0.4804	-0.478351
1900	-0.2861	-0.097965	0.3727	-0.337402
1901	-0.0047	-0.010612	0.3987	-0.0233004
1902	-0.4737	-0.44621	0.0775	-0.251241
1903	-0.2861	-0.49025	-0.1447	-0.45258
1904	-0.3799	-0.12347	0.2436	-0.244534
1905	-0.4424	-0.34857	-0.0246	-0.361553
1906	-0.333	-0.21243	0.1349	-0.294728
1907	-0.5988	-0.47175	-0.1316	-0.294955
1908	-0.333	0.13731	0.1073	-0.00468691
1909	-0.161	-0.15391	-0.1632	-0.133028
1910	-0.5519	-0.1649	0.1335	-0.424147
1911	-0.2236	0.087375	0.2779	-0.280192
1912	-0.8176	-0.93887	-0.5027	-0.607742
1913	-0.6769	-0.22523	-0.1706	-0.748318
1914	-0.4737	-0.40033	-0.1009	-0.330826
1915	-0.3486	0.12924	0.1931	-0.287212
1916	-0.333	-0.18887	0.0097	-0.456503
1917	-0.5206	-0.24538	-0.019	-0.317838
1918	-0.4424	-0.33148	-0.0694	-0.429003
1919	-0.1454	-0.037329	-0.0535	-0.280322
1920	-0.0047	0.28647	0.444	-0.206786
1921	0.0266	0.15609	0.4818	-0.0838462
1922	-0.2236	0.23291	0.3975	0.0980756
1923	-0.1923	0.044152	0.0223	-0.103809
1924	0.0891	0.058024	0.4243	0.0455137
1925	-0.036	-0.214	0.2278	-0.120349
1926	-0.1298	0.045276	-0.0067	-0.266816
1927	-0.1141	0.22616	0.5964	-0.186221
1928	-0.0203	0.28497	0.3789	-0.0153928
1929	-0.3017	-0.19295	-0.1469	-0.211422
1930	0.433	0.41576	0.4144	0.199609
1931	-0.2236	0.031636	0.1257	0.195654
1932	-0.2079	0.23243	0.2097	-0.020853
1933	-0.0047	0.059221	0.3462	-0.0206959
1934	-0.036	0.005184	0.418	0.0182873
1935	0.0891	0.075466	0.5313	0.0863179
1936	-0.0516	-0.031073	0.3858	-0.0304187
1937	0.1516	0.12704	0.5075	0.31974
1938	0.1203	0.17997	0.4634	0.339329
1939	0.1516	0.14054	0.3111	0.273621
1940	-0.0516	0.13984	0.157	0.215144
1941	-0.0203	-0.13018	0.3376	0.0603579
1942	0.1829	0.42645	0.5156	0.257007
1943	0.2454	0.39044	0.5396	0.172191
1944	0.1829	-0.12971	0.139	0.146004
1945	0.261	0.42222	0.2422	0.20266
1946	0.4486	0.038552	0.3756	0.0843605
1947	-0.0516	-0.074303	0.1165	-0.00816677
1948	0.4799	0.24491	0.2498	0.151001
1949	-0.0829	-0.050768	0.0642	-0.168063
1950	0.4955	0.31137	0.7717	0.0955571
1951	0.3392	0.13712	0.2913	0.211995
1952	0.1829	0.068638	0.593	0.105522
1953	0.2923	0.60257	0.8016	0.312278
1954	0.3705	0.22842	0.6089	0.1896
1955	0.4799	0.18261	0.4923	0.25859
1956	-0.1923	0.066662	0.3299	0.075857
1957	-0.0829	-0.038617	0.5614	0.108505
1958	-0.0047	-0.20405	0.2059	-0.159197
1959	0.0422	-0.099887	0.4649	0.151228
1960	0.0422	0.1305	0.5813	0.0291798
1961	0.1672	0.071543	0.2096	-0.0550591
1962	-0.036	-0.069474	0.3311	0.0211311
1963	0.0578	-0.17616	0.0568	-0.0206261
1964	-0.0985	-0.18932	0.158	0.256225
1965	-0.2079	-0.21428	0.1113	-0.00759445
1966	-0.0203	-0.11479	0.0703	-0.177633
1967	-0.0047	-0.13295	0.3407	0.0535811
1968	-0.3017	-0.57063	-0.2881	-0.0318303
1969	-0.2705	-0.50799	-0.1373	0.243951
1970	-0.0985	-0.13126	0.0584	0.0723747
1971	-0.2392	-0.15053	-0.0051	-0.0385364
1972	-0.3799	-0.34349	0.0239	-0.164774
1973	-0.0047	-0.035284	0.095	-0.00640936
1974	0.0578	-0.015579	0.1918	-0.0541104
1975	-0.161	-0.65034	-0.6275	-0.293539
1976	-0.0985	-0.31538	0.1976	0.0702963
1977	0.136	-0.042512	0.1932	0.175842
1978	-0.1298	-0.37431	-0.3744	0.0430848
1979	0.2141	0.0038937	0.1339	0.199303
1980	0.3079	-0.083485	0.2118	0.056822
1981	0.0109	0.037063	0.1629	0.0971035
1982	0.1516	-0.095972	0.129	0.275749
1983	0.1047	-0.15713	0.0741	0.152252
1984	0.136	-0.54911	0.1091	0.225542
1985	0.2454	-0.09978	0.3067	0.154345
1986	0.2298	-0.067309	0.2788	0.288101
1987	-0.0985	-0.20038	-0.1495	0.0189768
1988	0.3548	0.028578	0.3955	0.406295
1989	0.501	0.20892	0.7298	0.0498168
1990	0.2549	0.37054	0.7983	0.25697
1991	0.0574	0.21115	0.5732	0.228997
1992	-0.0841	-0.024889	0.115	0.0452426
1993	0.1645	0.037414	0.7453	0.24476
1994	0.5897	0.42224	0.8129	0.437977
1995	0.062	-0.11514	0.5791	0.194656
1996	-0.0301	-0.28924	0.1759	0.193654
1997	0.2408	0.11817	0.5167	0.0613403
1998	0.4538	0.13137	0.4447	0.502196
1999	0.2619	0.0059239	0.4952	0.211162
2000	0.4872	0.29716	1.1553	0.322105

## Sheet: 6 -1247 - 1262 Anomalies
Year	Wilson (2016)	Schneider (2015)	Guillet (2017)	Büntgen (2021)
1247	-0.0326	-0.10699	0.5649	-0.390348
1248	-0.296	-0.2159	0.0903	-0.364308
1249	-0.0161	-0.07757	0.3713	-0.0688762
1250	-0.0984	-0.18663	0.518	-0.284108
1251	-0.0984	0.10722	0.3747	-0.461721
1252	-0.016129	-0.2311	0.3304	-0.371036
1253	-0.065518	-0.2305	0.2901	-0.188176
1254	-0.36186	-0.24216	0.0943	-0.517342
1255	0.1485	-0.045239	0.4487	-0.181352
1256	-0.32893	-0.55832	-0.0964	-0.490578
1257	0.11558	-0.11054	0.1401	-0.247249
1258	-0.72405	-1.2033	-0.5869	-0.695844
1259	-0.70758	-0.84013	-1.0638	-0.846996
1260	-0.73012	-0.64376	-0.5263	-0.478853
1261	-0.54779	-0.40286	-0.4052	-0.435566
1262	-0.44834	-0.18201	-0.1005	-0.290618
10 year Background Climatology
					SI Figure X:
