# Supplementary material for: Utilizing a Multi-Proxy to Model Comparison to Constrain the Season and Regionally Heterogeneous Impacts of the Mt. Samalas 1257 Eruption
Source: Copernicus journal article supplement (doi:10.5194/egusphere-2023-999), 2023-05-30
Supplement: Supplementary file 1 [file Supplementary Sheet 1.xlsx]

## Sheet: README
File includes data incorporated into the globally-resolved mutli-proxy database for 1258-59
1 - Meta Data
Meta Data and Study Details overview for all data sources, split by data type - Tree Rings, Ice Cores, Lake Sediments, and Historical Records
(Resolution, Timespan, Lat/Long, Summer Definition, Online Resource Link)
2 - 1258-1259
Summer SAT anomalies for 1258 and 1259, as shown in Figure X
Anomalies are calculated relative to the 10-year pre-eruption average
Blue shading denotes negative (cold) SAT anomalies and red shading denotes positive (warm) SAT anomalies
3 - Full Data Sets
Where available complete data sets for the full length of incorporated records (from AD 0 to AD 2011) are included here for additional reference

## Sheet: 1 - Meta Data
Tree Rings
Short Reference	Parameter	Season	Temperature Proxy	Location	Lat	Long	Resolution	Earliest (AD)	Latest (AD)	Reference	Online Resource
T_1	TRW	Nov-April	SAT	Australia (Tasmania)	-41.8	145.5	Annual	0	1991	Cook et al., 2000	https://www.ncei.noaa.gov/access/paleo-search/study/6240
T_2	TRW	Nov-April	SAT	New Zealand (Oroko Swamp)	-43.2	170.3	Annual	900	1999	Cook et al., 2006	https://www.ncei.noaa.gov/access/paleo-search/study/1003986
T_3	TRW, MXD, CWT	Summer	SAT Anomaly	Siberia (NE Yakutia)	69	148	Annual	1258	1259	Churakova et al., 2019	https://cp.copernicus.org/articles/15/685/2019/
T_4	TRW, MXD, CWT	Summer	SAT Anomaly	Siberia (E Taimyr)	70	103	Annual	1258	1259	Churakova et al., 2019	https://cp.copernicus.org/articles/15/685/2019/
T_5	TRW, MXD, CWT + Frost Rings	Summer	SAT Anomaly	Siberia (Russian Altai)	50	89	Annual	1258	1259	Churakova et al., 2019	https://cp.copernicus.org/articles/15/685/2019/
T_6	TRW, MXD	June-July	SAT Anomaly	Siberia (Yamalia, Polar Urals)	66.8	68.4	Annual	0	2005	Briffa et al., 2013	https://www.ncei.noaa.gov/access/paleo-search/study/14468
T_7	Frost Rings	Summer	Frost Rings	Siberia (Yamalia, Polar Urals)	66.5	65.5	Annual	1258	1259	Hantemirov et al., 2004	https://www.sciencedirect.com/science/article/abs/pii/S0031018204001051
T_8	TRW	Jun-Aug	SAT Anomaly	NE Tibetan Plateu	33.7	96.5	Annual	1000	2002	Xu et al., 2019	https://www.ncei.noaa.gov/access/paleo-search/study/27290
T_9	TRW	Summer	SAT Minimum	China (Qilian Mountains)	38.7	99.7	Annual	1259	1260	Zhang et al., 2014	https://cp.copernicus.org/articles/10/1763/2014/
T_10	Frost Rings	Summer	Frost Rings	Mongolia	48.5	99	Annual	1258	1259	D’Arrigo et al., 2001	https://link.springer.com/article/10.1023/A:1010727122905
T_11	TRW	June-July	SAT	Northern Mongolia	49.9	91.3	Annual	931	2005	Davi et al., 2015	https://www.ncei.noaa.gov/access/paleo-search/study/20650
T_12	TRW, MXD	May-Aug	SAT	Sweden (Torneträsk)	68.2	19.5	Annual	0	2010	Melvin et al.,2012	https://www.ncei.noaa.gov/access/paleo-search/study/17175
T_13	MXD	April-Sept	SAT Anomaly	Central Scandinavia	62	14.1	Annual	850	2011	Zhang et al., 2016	https://www.ncei.noaa.gov/access/paleo-search/study/20429
T_14	Mixed	Jun-Aug	SAT	Fennoscanndia	68.6	24.6	Annual	800	2005	McCarroll et al., 2013	https://www.ncei.noaa.gov/access/paleo-search/study/19943
T_15	TRW	Jun-Aug	SAT Anomaly	Central Europe	49	13	Annual	0	2003	Büntgen et al., 2011	https://www.ncei.noaa.gov/access/paleo-search/study/10394
T_16	TRW	May-June	SAT Anomaly	Eastern Europe	48.5	19.5	Annual	1040	2011	Büntgen et al., 2013	https://www.ncei.noaa.gov/access/paleo-search/study/13669
T_17	TRW, MXD	March-Aug	SAT	USA (Upper Missouri River Basin)	43.3	-108	Annual	800	2011	Martin et al., 2020	https://www.ncei.noaa.gov/access/paleo-search/study/29413
T_18	TRW	Feb-Aug	SAT	Gulf of Alaska	59.5	-140.5	Annual	800	2010	Wiles et al., 2014	https://www.ncei.noaa.gov/access/paleo-search/study/16015
T_19	TRW	July-Aug	SAT Anomaly	Quebec	57.3	-74	Annual	910	2011	Gennaretti et al., 2014	https://www.ncei.noaa.gov/access/paleo-search/study/16558
T_20	TRW, MXD	May-Aug	SAT Maximum	Canadian Rockies	52.3	-117.3	Annual	950	1994	Luckman et al., 2005	https://www.ncei.noaa.gov/access/paleo-search/study/6395
T_21	TRW	Feb-May	SAT Anomaly	Novgorod, Russia	58.6	31.3	Annual	1160	1989	Helama et al., 2017	https://www.ncdc.noaa.gov/paleo/study/22890
T_22	TRW	July-Aug	SAT Anomaly	North Cairngorms, Scotland	57.2	-3.73	Annual	1200	2010	Rydval et al., 2018	https://www.ncdc.noaa.gov/paleo/study/24770
T_23	TRW	June-July	SAT Minimum	McKenzie Delta, Canada	68.6	-133.9	Annual	1245	2007	Porter et al., 2016	https://www.ncdc.noaa.gov/paleo/study/20652
T_24	TRW, BI	Jun-Aug	SAT	Western Mongolia	49.9	91.3	Annual	1178	2004	Davi et al., 2021	https://www.ncdc.noaa.gov/paleo/study/33614
Ice Cores
Short Reference	Data Type	Proxy Details		Location	Lat	Long	Resolution	Earliest (AD)	Latest (AD)	Reference	Online Resource
I_1	d18O	SAT		Greenland (GRIP, CRETE, DYE3)	69	39	Annual	1258	1259	Guillet et al., 2017, Vinther et al., 2010	https://www.nature.com/articles/ngeo2875
I_2	d18O	SAT		Svalbard	78.8	17.4	Annual	769	1997	Divine et al., 2017	https://www.ncdc.noaa.gov/paleo/study/22541
Lake Sediments
Short Reference	Data Type	Proxy Details		Location	Lat	Long	Resolution	Earliest (AD)	Latest (AD)	Reference	Online Resource
L_1	Varve Thickness	Melt Season SAT Anomaly		Alaska (Iceberg Lake)	60.7	-142.9	Annual	442	1998	Loso, 2008	https://www.ncei.noaa.gov/access/paleo-search/study/6197
L_2	Varve Thickness	Summer SAT		Canada (Baffin Island)	66.7	-61.3	Annual	752	1992	Moore et al., 2001	https://www.ncei.noaa.gov/access/paleo-search/study/5466
Historical Sources
Short Reference	Data Type	Chronicle Name		Location				Reference			Online Resource
H_1	Medieval Chronicle	Azuma Kagami		Japan				Farris, 2006			https://www.cambridge.org/core/journals/international-journal-of-asian-studies/article/abs/japans-medieval-population-famine-fertility-and-warfare-in-a-transformative-age-by-william-wayne-farris-honolulu-university-of-hawaii-press-2006-pp-372-isbn-10-082482973513-9780824829735-4800/EAAB40B4198FB0E27C6D83DE45A0BC3D
H_2	Medieval Chronicles	Mutiple Chonicles and Annals		Western Europe (England, France, Germany)				Guillet et al., 2017, Stothers, 2000			https://www.nature.com/articles/ngeo2875, https://link.springer.com/article/10.1023/A:1005523330643
H_3	Medieval Chronicle	Russian Annals		Altai Mountains, Russia				Guillet et al., 2017, Borisenkov and Pasetsky, 1988			https://www.nature.com/articles/ngeo2875
H_4	Medieval Chronicle	Þorgils Saga Skarða		Iceland				Bierstedt, 2019			https://www.academia.edu/45128500/Weather_and_Ideology_in_%C3%8Dslendinga_saga_A_Case_Study_of_the_Volcanic_Climate_Forcing_of_the_1257_Samalas_eruption
H_5	Medieval Chronicle	Chronicle of Novgorod		Novgorod, Russia				Stothers, 2000			https://link.springer.com/article/10.1023/A:1005523330643
H_6	Medieval Chronicle	Annales Ianuenses		Genoa, Italy				Guillet et al., 2017			https://www.nature.com/articles/ngeo2875
H_7	Medieval Chronicle	Chronicle of the Abbey of St. Edmunds		Suffolk, England				Stothers, 2000			https://link.springer.com/article/10.1023/A:1005523330643

## Sheet: 2 -1258-59
Tree Rings
Short Reference	Location	Lat	Long	1258	1259
T_1	Australia (Tasmania)	-41.8	145.5	-0.389727	-0.365727
T_2	New Zealand (Oroko Swamp)	-43.2	170.3	-0.741818	-0.0608182
T_3	Siberia (NE Yakutia)	69	148	Negative Anomaly	Negative Anomaly
T_4	Siberia (E Taimyr)	70	103	Negative Anomaly	Negative Anomaly
T_5	Siberia (Russian Altai)	50	89	Negative Anomaly	Negative Anomaly + Frost Ring
T_6	Siberia (Yamalia, Polar Urals)	66.8	68.4	-2.7062	-4.4052
T_7	Siberia (Yamalia, Polar Urals)	66.5	65.5	Frost and Light Rings	Frost and Light Rings
T_8	NE Tibetan Plateu	33.7	96.5	-0.49788	-0.301521
T_9	China (Qilian Mountains)	38.7	99.7		Min T Anomaly
T_10	Mongolia	48.5	99	Frost Rings	Frost Rings
T_11	Northern Mongolia	49.9	91.3	-1.13355	-2.38955
T_12	Sweden (Torneträsk)	68.2	19.5	0.208727	-0.690273
T_13	Central Scandinavia	62	14.1	-0.656364	-0.406364
T_14	Fennoscanndia	68.6	24.6	-0.0563636	-0.936364
T_15	Central Europe	49	13	-0.367727	0.163273
T_16	Eastern Europe	48.5	19.5	-0.144419	-1.04292
T_17	USA (Upper Missouri River Basin)	43.3	-108	-0.525983	0.781317
T_18	Gulf of Alaska	59.5	-140.5	0.960273	0.725273
T_19	Quebec	57.3	-74	0.0907358	-2.64757
T_20	Canadian Rockies	52.3	-117.3	-1.67182	0.288182
T_21	Novgorod, Russia	58.6	31.3	-0.721818	0.618182
T_22	North Cairngorms, Scotland	57.2	-3.73	-0.154973	0.406827
T_23	McKenzie Delta, Canada	68.6	-133.9	-0.718182	0.0118182
T_24	Western Mongolia	49.9	91.3	-1.12472	-0.207632
Ice Cores
Short Reference	Location	Lat	Long
I_1	Greenland (GRIP, CRETE, DYE3)	69	39	-0.1
I_2	Svalbard	78.8	17.4	-0.0553	-0.6676
Lake Sediments
Short Reference	Location	Lat	Long
L_1	Alaska (Iceberg Lake)	60.7	-142.9	0.115455	-0.164545
L_2	Canada (Baffin Island)	66.7	-61.3	-1.64969	-0.637528
Historical Sources
Short Reference	Location
H_1	Japan			Wet and cold summer accompaniedby heavy rain and strong winds
H_2	Western Europe (England, France, Germany)			References to unusually cold springtime, summer, and Autumn as well as increased rainfall	References to warmer temperatures and dry weather
H_3	Altai Mountains, Russia				Reference to abnormal July snowfall
H_4	Iceland			Reference to a harsh Springtime
H_5	Novgorod, Russia				Reference to an odd frosty day during April 1259
H_6	Genoa, Italy				Reference to an unusually dark lunar eclipse on the 12 November 1258
H_7	Suffolk, England			Reference to an unusually dark lunar eclipse on the 18 May 1258

## Sheet: 3 - Full Data Sets
	T_1	T_2	T_6	T_8	T_11	T_12	T_13	T_14	T_15	T_16	T_17	T_18	T_19	T_20	T_21	T_22	T_23	T_24	I_2	L_1	L_2
	Tasmania	Oroko Swamp	Polar Urals	Tibetan Plateu	Northern Mongolia	Torneträsk	Central Scandinavia	Fennoscanndia	Central Europe	Eastern Europe	Missouri River Basin	Gulf of Alaska	Quebec	Canadian Rockies	Novgorod	North Caingorms	McKenzie Delta	Western Mongolia	Svalbard	Iceberg Lake	Baffin Island
2011							1.65			2.90613	8.5667		13.9872
2010						11.576	0.6			0.686064	8.8104	8.38	13.894			1.4306
2009						12.148	0.9			0.788555	8.5872	7.808	12.4643			1.1973
2008						10.793	0.99			1.80492	8.4995	6.85	13.6735			0.5823
2007						10.966	1.33			0.355247	10.906	6.996	13.5838			0.2273	6.76
2006						10.959	0.72			-0.525603	10.229	7.755	13.448			0.6621	8.23
2005			0.064		18.016	10.795	0.01	11.85		0.0472057	9.3191	8.337	13.7315			0.5296	7.15
2004			2.716		19.194	10.907	0.44	11.56		-1.11606	9.6636	8.412	12.7984			0.3237	8.01	13.4082
2003			2.966		19.206	12.13	0.96	12.13	4.008	0.449766	10.267	7.577	13.3087			1.4109	7.38	12.8438
2002			0.452	1.67769	18.432	11.005	0.51	11.86	2.127	1.15411	8.4981	7.27	12.7468			0.7809	7.29	12.4354
2001			-0.778	1.29353	18.016	10.965	-0.2	11.38	2.896	-0.474927	10.05	7.377	13.0058			0.1975	6.92	13.9533
2000			1.238	0.902093	18.564	10.79	-0.4	12.1	1.631	1.13759	10.159	7.229	12.6434			1.0228	7.87	12.088
1999		17.233	0.753	1.52619	17.25	10.431	0.27	11.31	1.273	0.836953	8.8359	7.808	12.879			0.9471	7.58	11.9032
1998		15.767	2.05	0.837934	17.176	10.645	-0.44	11.34	2.688	0.989551	9.0829	7.96	12.5423			-0.1306	7.48	13.6439		0.1
1997		15	-2.854	0.861361	16.99	10.345	0.64	11.98	-0.067	0.647346	8.7163	8.289	12.526			0.9858	7.35	12.4048	-23.7938	0.15
1996		16.1	2.251	0.956365	17.456	9.979	-0.13	11.22	0.033	-0.993075	8.5512	7.801	12.2164			-0.0217	7.28	13.1577	-10.8787	0.21
1995		15.3	0.43	0.12345	17.11	9.872	-0.1	10.36	1.834	-1.31763	7.9055	8.161	12.0904			-0.1594	6.72	11.6589	-10.1687	0.19
1994		15.4	1.608	0.711192	17.925	10.268	0.45	11.87	1.963	-1.09101	9.9089	8.261	11.3514	0.52		-0.2159	6.27	12.0141	-19.9422	0.18
1993		13.8	1.382	0.995539	16.978	10.485	-0.17	11.48	1.105	-0.251726	7.9726	7.84	12.7089	-1.17		-0.1228	6.45	10.2944	-14.9119	0.15
1992		13.7	1.856	0.477869	16.953	10.163	-0.34	10.66	0.846	-1.11492	9.6728	7.94	10.9189	-0.38		0.5595	6.99	11.7957	-15.2181	0.18	1.98366
1991	15.667	15.1	1.402	1.05697	17.279	10.35	0.31	11.11	0.653	-0.882043	8.8809	7.892	11.1556	-0.36		1.1563	5.96	13.4745	-13.7183	0.26	1.74267
1990	15.453	15.767	0.792	0.964738	17.106	10.571	0.34	11.83	-0.062	-0.526742	9.0593	8.143	12.2772	0.51		1.2809	6.45	12.3281	-16.9614	0.19	1.83907
1989	15.822	16.833	2.437	0.904043	16.735	10.471	0.53	11.83	-0.032	-0.485177	8.7984	7.698	11.6127	0.44	0.93	0.6574	6.41	11.3493	-12.9846	0.1	2.29695
1988	15.625	14.9	1.127	0.874783	15.499	10.67	0.52	11.6	1.323	-0.66055	10.13	7.648	12.7174	0.71	1.45	0.3876	6.26	10.6261	-13.7709	0.19	1.42938
1987	15.322	15.333	1.397	0.648909	16.175	10.361	-0.89	10.66	0.286	-0.753361	9.4752	7.616	11.4228	0.48	-0.46	0.4932	6.38	11.5121	-10.9121	0.27	4.65865
1986	15.712	16.033	0.708	0.391425	17.489	10.498	-0.16	11.44	0.425	2.20407	9.785	7.888	12.2158	0.34	-0.91	-0.2922	6.76	11.6736	-11.0541	0.15	3.3814
1985	15.186	15.467	0.015	0.494732	16.706	10.806	-0.35	12.28	0.534	-0.5945	9.2869	7.799	12.4201	0.35	-0.74	-0.3035	6.39	10.6951	-14.743	0.12	2.77893
1984	15.392	15.667	2.93	0.354558	17.662	9.893	-0.4	10.92	-0.007	-0.804606	8.7735	8.236	11.7032	0.78	-0.43	0.591	6.32	10.4801	-15.0652	0.17	2.17645
1983	15.516	13.733	1.981	0.446411	16.257	10.097	-0.34	11.42	0.976	0.99923	8.5553	8.282	11.3372	0.7	-0.39	0.7931	6.35	10.3309	-13.5626	0.16	3.30911
1982	15.296	15.1	1.278	0.377654	16.546	9.874	-0.11	10.66	1.045	2.1756	8.5184	8.259	11.399	0.07	-1.5	0.9471	7.1	11.2725	-16.301	*	3.26091
1981	16.013	15.867	-0.501	0.503326	16.686	9.954	-0.23	10.51	-0.742	2.10955	8.5864	8.706	11.6532	-0.38	-0.46	1.2756	6.25	12.0659	-13.6822	0.23	3.06812
1980	15.219	14.967	-2.459	0.551742	17.806	10.518	0.41	12.21	-0.687	-0.0974201	7.7533	8.733	12.497	-0.79	-1.12	0.2733	6.28	12.1616	-8.1057	0.37	4.00798
1979	15.728	15.033	1.473	0.231282	17.044	10.584	-0.51	11.89	-0.404	1.11311	9.1429	8.011	12.8154	0.4	-0.08	-0.3161	6.18	12.1322	-10.8833	0.05	2.82713
1978	15.378	15.633	1.22	0.164661	16.447	10.236	-0.09	10.67	-0.806	-0.283612	8.163	7.799	12.1588	0.15	1.52	-0.1001	6.57	11.4478	-14.2252	0.25	3.4537
1977	15.333	14.9	0.076	0.628691	16.673	10.338	-0.61	10.99	-0.717	-0.442472	9.2838	7.986	11.5428	0.2	-1.2	-0.521	6	11.6295	-15.491	0.06	3.4778
1976	14.978	14.467	0.441	0.00509704	17.242	10.557	0.34	11.21	-0.613	-0.440195	7.3852	6.861	11.1323	-1.38	0.02	0.4477	6.46	11.2515	-12.4848	-0.02	2.68253
1975	15.411	16.9	-2.515	0.505405	16.789	10.004	0.57	10.51	-2.235	-0.130445	7.1857	6.791	11.0101	-0.35	1.13	0.6954	6.66	12.1395	-14.4353	-0.02	3.76699
1974	15.705	15.667	0.401	0.132365	16.488	10.132	-0.04	11.6	-0.791	-2.29926	7.6149	6.597	11.2211	-0.55	0.06	-0.2526	5.73	12.5274	-14.9086	-0.12	5.02013
1973	15.688	14.6	-1.588	0.522341	16.5	10.759	0.15	11.75	-0.737	-0.183398	8.9055	5.824	12.161	0.16	0.05	-0.0516	6.35	11.6222	-12.2883	0.17	2.03186
1972	15.294	15.5	-0.623	0.454239	16.385	10.412	0.59	11.65	-0.364	0.301724	8.4546	6.572	12.2738	-0.01	0.4	-0.0095	6.37	11.1957	-12.764	0.12	2.39334
1971	16.013	17.233	-2.422	0.157352	15.928	10.108	-0.8	10.67	1.05	0.726491	8.5111	6.912	11.2201	0.1	-0.03	0.4359	5.88	10.5298	-8.7611	0.2	3.09221
1970	15.45	16.333	-1.236	0.41656	16.171	10.388	-0.24	11.85	0.827	1.45645	9.3495	6.681	12.3684	1.09	1.81	-0.5552	6.12	11.4478	-14.2445	0.44	1.93546
1969	15.371	14.533	0.313	0.213525	16.842	10.4	-0.06	11.17	0.98	1.53104	9.1379	7.589	12.5073	0.24	-1.71	0.2237	5.95	11.8878	-11.5017	0.1	3.3332
1968	15.565	15.033	-1.688	-0.0674509	16.298	10.316	0.17	9.79	-0.171	0.356386	6.0641	7.691	11.6176	-1.1	-1.05	-0.2015	6.14	11.7649	-15.1457	0.38	3.16451
1967	15.238	15.033	-0.23	0.0818834	16.294	10.341	0.32	11.12	-0.022	0.409339	8.797	7.311	12.6935	1.38	0.86	0.4231	5.75	11.1887	-15.7838	0.2	3.74289
1966	14.918	16.033	-0.401	0.110696	16.41	10.211	-0.12	10.7	-0.99	0.830121	9.0605	8.216	11.9284	-1.26	0.02	0.0664	6.15	11.8802	-22.2886	0.19	3.74289
1965	14.799	15.1	3.187	0.538987	16.624	10.018	0	9.78	-1.148	-0.956634	8.0671	8.163	11.7959	0.56	-0.41	-0.9529	6.52	12.3588	-19.042	0.07	3.5742
1964	14.71	14.167	2.576	0.497716	17.192	11.195	0.07	11.58	-0.791	0.65247	6.7159	7.997	12.3507	-0.87	-0.41	0.0832	5.64	11.6736	-22.7989	0.17	3.26091
1963	14.822	15.1	1.001	0.136724	16.08	9.861	0.36	10.27	-1.084	0.0967429	10.126	8.318	12.2355	-0.05	-0.74	-0.5761	5.85	12.1837	-14.4113	0.25	2.97172
1962	14.866	15.567	-0.425	-0.180239	16.331	10.401	-0.88	10	-0.26	-1.30966	8.0709	7.555	12.669	-1.3	-0.16	-1.2245	5.84	11.5781	-17.9993	0.43	5.04423
1961	15.231	15.333	0.268	0.15975	15.66	10.573	-0.2	11.2	-0.96	0.864854	9.9521	8.122	12.1456	0.34	0.15	-0.6985	6.24	9.80131	-17.9887	0.28	4.10437
1960	15.07	15.067	-1.097	0.135102	16.595	11.279	0.28	12.71	-0.861	0.245354	9.4978	7.614	11.7575	0.35	-0.44	-0.637	6.4	11.2655	-14.0249	0.39	4.6707
1959	15.032	15.4	-0.545	0.652137	17.452	10.697	1.18	11.68	-0.697	0.088202	8.0336	7.712	11.9858	-1.35	0	0.9588	5.84	11.5781	-12.9356	0.36	3.32116
1958	14.539	15.7	-0.811	0.516749	16.154	10.175	-0.33	11.33	0.142	0.264144	9.5748	7.748	11.2937	0.93	-1.71	-0.4857	6.45	9.58589	-17.8294	0.32	2.98377
1957	14.745	14.706	0.306	0.549886	17.349	10.579	0.06	11.86	-1.377	0.0893408	8.1227	7.477	12.061	-0.85	0.71	-0.4272	5.74	11.2655	-13.6498	*	3.29706
1956	15.205	14.927	2.67	0.577567	16.719	10.121	-0.18	10.9	-1.129	-0.0735056	8.9999	6.782	11.5254	0.88	-2.47	-1.2296	5.99	10.908	-12.3863	0.01	2.80303
1955	15.02	14.517	0.985	0.638908	17.003	10.311	0.68	11.2	-0.622	-0.26596	9.1603	7.276	11.3675	0.65	-0.15	0.8617	5.94	11.5634	-15.8726	0	2.65843
1954	14.936	14.168	0.23	0.669092	17.489	11.039	0.19	12.27	0.072	-1.32161	7.5651	7.436	11.8746	-0.86	-0.18	-0.7775	6.37	11.3353	-13.1469	-0.11	3.21271
1953	14.476	14.637	1.508	0.356533	17.707	10.93	0.43	12.03	0.157	-1.54368	8.5475	8.027	11.4429	-0.3	-0.82	0.7599	5.74	11.5707	-18.2014	-0.23	2.62229
1952	14.201	14.112	0.066	0.292284	16.554	10.1	-0.31	11.1	1.616	-2.4251	8.7515	7.112	12.5017	0.23	-0.73	0.491	5.8	10.385	-8.5021	-0.11	2.24875
1951	15.168	15.143	0.368	0.223618	17.019	10.424	0.58	11.45	1.616	-1.09784	7.1805	7.591	11.7512	-0.38	0.23	-0.1899	5.62	11.6736	-12.1314	-0.16	2.03186
1950	14.67	14.674	-1.499	0.382713	17.011	10.65	0.85	12.26	0.941	-1.12005	8.7397	7.381	11.9078	0.95	0.43	0.1996	6.06	11.2166	-9.5932	-0.05	2.04391
1949	14.74	14.802	-2.004	0.513227	16.546	10.536	-0.11	10.82	0.757	-1.70539	9.1763	6.595	11.2172	-0.03	0.29	1.2765	5.26	11.5781	-9.047	-0.1	2.1644
1948	15.116	14.963	0.132	0.72973	17.023	10.737	0.97	11.63	-0.89	-2.85328	8.4642	6.964	12.2156	0.65	0.34	0.0983	5.96	12.4201	-19.6621	-0.02	2.80303
1947	14.887	14.145	-3.615	0.423956	16.389	10.819	1.36	11.81	0.896	-1.53286	8.2687	7.14	11.7231	-0.27	0.18	1.1126	5.53	11.6663	-14.2144	0.04	2.65843
1946	14.301	14.117	-2.674	0.814221	17.629	10.71	0.96	11.52	0.315	0.261867	8.4972	7.634	11.9033	0.08	-0.38	-0.3507	5.72	11.9697	-13.4739	0.04	2.36924
1945	14.495	14.214	-0.115	0.203447	16.051	11.273	0.35	11.84	-0.101	-0.798912	8.5556	7.625	11.1858	0.65	1.5	1.2432	5.95	12.6934	-16.2142	0.1	1.97161
1944	14.925	15.203	-1.24	0.375862	17.283	11.15	-0.06	11.26	0.251	-1.58126	8.1383	7.6	11.6848	-0.42	-0.15	0.4178	5.81	12.088	-17.0297	0.04	1.86317
1943	14.743	14.411	0.596	0.738067	16.574	11.015	0.61	11.62	0.142	-2.17286	7.6153	7.915	11.4383	-0.48	1.52	0.5406	5.74	11.6369	-17.5251	-0.07	1.99571
1942	14.885	14.605	1.942	0.716377	15.973	10.771	0.19	11.54	-0.593	-2.12275	8.8622	8.471	11.9786	-0.06	-1.17	-0.1913	5.6	11.4335	-13.5944	-0.13	2.15235
1941	14.838	14.752	-2.542	0.321803	17.172	11.421	-0.03	12.06	-0.498	-1.80958	8.5365	8.006	12.0539	0.53	-0.39	-0.4275	5.71	11.8033	-15.0453	-0.09	2.20055
1940	15.434	13.951	0.749	0.334644	16.574	10.329	0.44	11.26	-0.608	-1.82553	9.8534	7.311	11.2742	0.34	-0.3	-0.3601	5.39	11.2795	-11.8435	-0.02	2.99582
1939	15.639	13.96	3.156	0.228435	16.393	10.555	0.74	11.98	0.132	-1.694	9.4284	7.504	11.3717	0.01	-1	0.1266	5.46	11.5267	-12.4347	-0.02	3.11631
1938	14.92	14.697	2.349	0.198485	16.336	11.119	0.46	12.3	0.464	-0.855851	9.5599	7.206	11.8001	0.23	-0.3	0.7747	5.58	10.735	-12.9351	-0.15	2.309
1937	15.013	13.482	0.999	-0.097631	15.895	11.286	1.22	13.29	-0.171	-0.590514	8.8542	7.151	12.1572	-0.96	0.97	0.3787	5.95	11.1678	-12.1218	-0.16	1.97161
1936	15.14	14.218	-0.603	0.0126067	15.862	9.492	0.31	11.25	-0.077	-0.177704	9.9159	7.792	11.2447	1.37	0.05	0.1838	5.7	11.2306	-9.3818	-0.06	1.92341
1935	14.859	15.106	-0.859	0.15751	16.925	9.913	-0.64	11.18	0.196	-0.967452	8.1612	8.008	12.5336	-0.44	-0.33	0.5623	6.05	11.7112	-12.286	-0.05	2.00776
1934	14.712	14.816	-2.911	-0.235002	16.583	11.042	0.86	12.71	-0.687	-1.68546	9.4878	7.874	11.4399	-0.31	0.34	0.4896	5.73	11.6295	-13.8511	0.02	2.17645
1933	14.743	15.442	-0.667	0.0986818	16.451	10.212	0.36	11.51	-0.677	-2.19165	9.5833	7.694	10.3891	0.34	-0.73	1.2109	5.63	10.6497	-14.5446	-0.01	1.95956
1932	14.789	14.531	-3.259	-0.105575	16.323	9.981	-0.12	11.38	0.355	-1.27492	9.4318	7.263	11.6273	0.1	0.33	-0.0772	5.49	10.0581	-8.521	-0.06	2.20055
1931	14.392	14.168	-1.212	0.0294382	16.196	10.264	-0.64	11.15	0.846	-1.41556	10.084	8.209	11.7908	-0.11	-0.14	-0.5549	5.54	10.7916	-7.7893	0.12	2.20055
1930	14.5	14.623	-1.679	-0.189535	16.686	11.11	0.99	12.35	-0.364	-2.12617	8.9537	8.517	12.1982	0.13	0.37	-0.8067	5.83	11.9771	-11.8828	-0.12	2.34515
1929	14.271	14.609	0.16	-0.370115	16.492	9.509	-0.59	10.12	0.276	-1.44403	9.5168	7.897	10.8318	-0.27	-0.38	-0.0806	5.62	11.3283	-8.666	-0.04	2.20055
1928	14.869	16.496	1.265	-0.605112	16.06	9.424	-0.81	10.48	0.291	-1.16959	8.6911	7.744	11.633	0.22	-0.15	-0.3042	5.86	11.8878	-12.2521	-0.01	2.34515
1927	14.635	15.309	-0.493	-0.150663	15.915	10.386	-0.08	12.15	0.082	-0.418558	7.3829	8.334	10.9472	-0.09	0.06	-0.6675	5.98	10.544	-11.3049	0.05	1.93546
1926	14.792	14.89	0.873	-0.374556	16.163	10.239	0.04	11.44	-1.65	-0.6503	8.5318	8.747	9.64826	-0.09	-0.51	0.7895	5.74	11.2096	-12.0603	-0.05	1.79087
1925	14.404	15.037	0.319	-0.311477	15.932	10.839	0.7	12.16	-0.508	-0.448735	8.2182	7.826	10.4086	1.15	0.45	0.3416	5.57	10.6879	-12.3011	-0.01	1.76677
1924	14.546	15.925	2.42	0.342405	16.611	10.51	0.37	12.13	0.112	0.0830774	8.5417	8.307	11.6089	-0.41	-0.31	-0.4471	5.65	11.534	-9.3093	0.05	1.59808
1923	14.579	14.646	3.046	-0.187117	15.87	10.425	-0.93	10.26	-0.558	-1.28631	7.4968	8.357	10.2243	-0.08	-0.61	-0.6566	5.93	10.2731	-6.5071	-0.13	1.76677
1922	15.116	15.401	1.959	0.130353	17.032	10.673	-0.05	12.19	-0.667	-1.18325	9.1117	7.732	11.1601	0.08	0.72	-1.5043	5.48	11.9403	-12.5511	-0.04	1.93546
1921	15.329	14.729	2.022	0.19478	17.246	10.113	-0.24	11.36	-0.493	-1.01471	8.2577	8.02	10.9992	-0.45	0.36	0.1226	5.5	11.2725	-14.5492	-0.04	2.58614
1920	15.495	14.149	-0.16	0.229027	16.385	10.184	0.05	11.78	-1.893	-0.355924	6.8621	7.894	10.9955	0.01		-0.4203	5.26	11.3423	-18.4796	0.13	1.93546
1919	15.186	14.131	-1.696	-0.319464	15.998	10.057	-0.2	11.08	-1.287	-1.61713	8.991	6.893	12.483	0.17		0.0855	5.64	10.7512	-18.7499	0.11	2.36924
1918	15.093	14.545	0.741	-0.786784	16.183	10.324	0.27	10.98	-1.665	-2.07037	7.8841	7.84	10.8318	-0.2		0.2409	5.3	11.0769	-21.4835	0.17	2.36924
1917	14.866	14.881	0.726	-0.248486	15.833	9.497	0.1	10.68	-0.25	-1.5266	7.7134	7.073	11.7896	-0.2		0.2409	5.49	10.735	-12.5585	0.08	3.5742
1916	14.885	16.063	-1.175	-0.136145	15.528	10.031	-0.4	10.68	-1.804	-0.912791	7.538	7.84	11.6906	-0.31		-0.3613	5.5	11.7573	-15.8774	-0.02	2.70663
1915	15.179	14.798	1.614	0.159607	15.924	10.074	-0.8	10.62	-1.362	-0.994214	7.0699	8.87	11.5036	-0.54		-0.871	5.49	10.84	-17.45	0.17	2.03186
1914	14.353	15.442	-2.314	-0.0184765	15.174	9.919	0.01	10.58	-1.362	-1.2772	8.9852	8.104	12.0314	0.25		0.2209	5.39	10.5227	-14.7085	0.1	3.14041
1913	14.388	14.416	-0.785	0.125287	14.552	9.4	-0.78	10.36	-2.285	-1.77485	7.9138	7.657	10.8346	-0.47		-0.3955	5.51	9.71078	-13.899	0.03	1.79087
1912	14.317	13.698	-2.642	-0.169415	14.49	9.449	-0.64	10.33	-0.047	-0.667382	7.8499	7.409	10.2377	-0.32		-0.8566	4.89	9.57788	-14.5537	0.07	1.57398
1911	14.81	15.304	1.895	-0.0195516	15.483	8.784	-0.82	9.67	-0.146	0.159376	8.1535	7.238	12.3078	-1.02		0.2724	5.22	7.61627	-18.8863	0	2.61023
1910	14.523	15.7	-0.343	-0.0312736	16.488	8.882	0.15	9.61	-0.732	0.5124	8.9335	6.549	10.747	-0.44		-0.2727	5.49	10.3309	-11.5275	0.2	1.98366
1909	14.187	15.552	2.397	0.238152	17.019	9.046	-1.36	9.38	-0.33	-0.405462	7.8828	7.13	11.4963	-0.42		-1.5643	5.72	11.7035	-13.5977	-0.07	1.93546
1908	14.161	15.12	0.542	-0.0199313	16.541	9.648	-0.27	10.6	0.653	-0.146957	8.0224	7.217	11.0336	0.27		-0.6977	5.26	11.3074	-12.5751	-0.29	2.48974
1907	14.126	14.982	-0.669	0.326599	16.286	9.086	-1.33	9.76	-0.091	-0.408878	5.9027	7.472	11.0954	-1.6		-1.0385	5.29	10.5511	-12.2617	-0.27	6.24918
1906	14.392	14.338	-0.06	0.246333	16.15	9.001	-0.47	10.02	-0.662	-1.10297	7.9154	7.988	11.5996	0.48		0.0387	5.31	10.0812	-12.5171	-0.03	3.23681
1905	14.308	15.281	-0.995	0.228062	16.809	8.987	-1.4	9.96	0.37	-1.51065	7.7777	8.305	10.8818	-0.09		-0.2653	5.26	10.6497	-14.1044	-0.31	3.21271
1904	14.593	16.008	-0.342	0.179666	16.401	8.571	-1.27	9	1.04	-1.45257	8.5836	7.023	12.4803	0.4		0.511	5.4	11.0268	-13.9828	-0.13	4.17667
1903	14.385	15.272	-2.756	0.269	16.706	8.654	-1.03	8.74	-0.141	-0.561475	7.9723	7.596	12.0636	-0.29		-0.2917	5.39	9.60992	-12.6116	-0.13	3.74289
1902	14.254	14.931	0.746	0.134524	16.999	9.639	-1.46	9.08	-0.627	-0.98795	8.0241	8.065	12.1608	-0.86		-1.2762	5.31	10.6879	-12.243	-0.18	3.23681
1901	14.619	15.787	-1.6	0.155563	17.275	10.534	0.61	10.98	-0.578	-0.273932	8.5484	7.876	12.2888	0.3		0.5905	5.58	10.9747	-14.4993	-0.21	5.33342
1900	14.766	15.318	0.589	0.021151	17.093	9.124	-0.78	8.94	-0.662	-0.068381	8.075	7.805	11.4353	-0.42		0.0186	5.51	9.60992	-15.9106	-0.27	2.94762
1899	14.126	14.416	-2.989	0.315655	15.668	9.985	-1.46	9.47	-1.158	-0.3229	5.1726	7.087	11.3797	-2.35		0.4051	5.89	9.29132	-15.9288	*	3.09221
1898	14.413	13.997	2.38	0.0339697	16.562	10.422	-0.9	11.21	-1.173	-0.257989	9.1061	6.973	11.1361	0.71		0.1574	5.13	10.6103	-16.9761	-0.07	3.76699
1897	14.803	14.6	1.428	-0.0239202	16.92	9.847	0.44	10.86	-1.183	-0.490301	8.1001	6.889	12.1206	-0.18		0.3755	5.69	11.3493	-13.2749	-0.08	4.82734
1896	15.149	13.878	-0.002	0.440342	16.99	10.217	-0.25	11.04	-0.92	0.125782	8.5662	7.016	12.4611	-0.13		-0.3919	5.68	10.8934	-14.7462	-0.02	6.05639
1895	15.485	15.244	-0.637	-0.605472	15.487	10.101	-0.29	11.12	-0.647	-0.198772	7.4208	6.638	13.4569	-1.16		-0.8836	5.69	10.2802	-13.2984	-0.05	2.61023
1894	15.161	15.525	-2.327	0.0122672	15.862	9.714	-0.1	11.11	-0.439	-1.10525	9.0535	6.886	11.95	0.65		-0.9879	5.5	10.6418	-13.97	-0.08	2.24875
1893	14.689	14.894	-1.307	0.041343	16.183	9.259	-0.39	9.48	-0.513	-0.718058	7.5227	7.628	12.6829	-0.54		0.4732	5.32	10.3464	-15.1449	-0.08	4.20077
1892	14.467	15.838	-0.994	0.247668	16.401	9.251	-0.97	8.83	-0.474	-0.208452	8.2173	7.771	12.1382	-0.72		-0.6582	4.8	10.0272	-14.5899	-0.04	2.05596
1891	14.616	14.807	-3.607	0.0216162	16.344	10.377	-0.7	10.03	-1.342	-0.798912	8.3638	7.317	12.2717	0.4		-1.1124	5.91	10.5369	-16.6033	-0.01	2.80303
1890	15.56	15.566	0.361	0.403376	15.788	10.55	-0.7	11.46	-1.193	-1.51464	8.0846	7.137	11.7772	0.06		-0.1339	5.28	10.2163	-18.4983	-0.05	3.71879
1889	15.394	15.083	-4.788	0.0100677	15.59	9.81	-0.08	10.64	0.142	-0.612151	9.3936	7.055	11.7336	-0.35		-0.1249	5.68	10.7674	-16.9199	-0.1	3.71879
1888	14.745	14.232	-1.536	0.149959	15.388	9.117	-0.96	9.78	-0.687	-1.2009	8.4781	6.964	12.4118	0.28		-1.0396	5.72	8.3728	-18.4894	-0.09	3.64649
1887	14.778	15.258	-0.085	-0.169506	14.701	9.732	-0.58	10.38	0.335	-1.62282	8.3543	6.376	12.7319	-1.03		0.1975	5.25	8.32197	-17.3813	-0.16	2.73073
1886	15.263	15.447	-0.738	-0.0832828	14.614	9.363	-0.24	10.92	-0.523	-0.636066	9.3016	7.614	12.9104	0.63		-0.4547	5.61	10.0118	-19.5337	0.09	3.4537
1885	15.13	15.106	-3.934	-0.200679	14.82	9.428	-1.18	9.78	0.206	-0.771581	7.9618	8.015	12.813	-0.7		-1.48	5.27	10.3927	-18.0677	-0.03	4.15257
1884	15.562	14.407	-3.854	-0.547887	13.337	9.732	-0.29	10.31	-0.384	-1.21912	7.2103	7.659	12.0219	-0.39		-0.2122	5.5	8.02663	-15.6796	0.11	2.89942
1883	15.383	15.364	-3.095	-0.233778	14.779	10.11	-0.43	11.45	0.142	-0.44418	8.0115	6.314	12.5695	-0.33		-1.3994	4.85	9.90693	-13.3009	0.3	3.76699
1882	14.708	15.281	-4.148	0.0914033	15.257	9.767	-0.21	11.24	-0.459	-1.41272	8.2678	7.003	12.469	-0.04		-0.3676	5.63	10.1121	-18.5	0.34	2.34515
1881	14.261	15.203	-1.165	-0.076108	16.105	8.761	-1.41	9.61	0.464	-1.16674	7.475	7.226	13.8654	-1.47		-1.8724	4.93	10.4158	-18.8541	0.12	2.22465
1880	14.694	15.451	-0.203	0.0508144	16.476	9.572	-0.64	9.91	-0.206	-1.02268	5.6566	6.517	13.5778	-1.43		0.4235	5.42	10.4081	-21.5718	-0.25	3.4055
1879	14.556	13.574	0.18	0.07491	17.18	10.108	-0.02	10.9	0.107	-1.08475	7.903	7.073	12.699	-0.49		-1.2561	5.47	10.195	-22.1385	-0.14	2.39334
1878	14.955	14.434	1.042	-0.439841	16.616	9.807	-0.58	10.25	-0.409	-2.15577	9.3748	6.788	13.1514	-0.1		1.149	5.18	10.4517	-22.0204	0.22	2.10416
1877	15.011	14.476	0.803	-0.594982	16.71	10.155	-1.22	10.03	0.082	-1.70482	7.9046	6.398	12.1599	-0.88		-1.1158	5.22	10.8934	-23.5299	0.08	2.15235
1876	15.254	15.065	-1.061	-0.292753	15.915	10.743	-0.97	11.1	0.256	-2.2856	7.0389	6.499	10.8935	-2.26		0.5963	5.16	9.58589	-19.7346	0.23	2.97172
1875	15.66	14.963	-0.879	-0.293113	16.117	9.955	-0.41	10.67	0.971	-1.25158	7.3925	7.194	13.1597	-0.42		0.5218	5.26	9.47435	-15.7785	0.05	4.22487
1874	15.534	14.71	-1.388	-0.236716	15.504	9.409	-1.03	9.89	1.025	-2.13983	8.5699	7.719	13.3374	-0.61		0.5407	4.78	9.45196	-14.0911	0.18	3.04402
1873	15.254	14.954	-2.801	-0.305187	15.014	10.444	-0.94	11.65	0.162	-1.9024	8.8352	7.705	13.8589	-0.69		-0.4783	4.86	8.2421	-15.7762	0.11	2.89942
1872	15.714	15.051	0.427	-0.266241	15.306	9.796	-0.22	10.75	-0.603	-1.61656	7.6117	7.498	12.0472	-1.32		-0.4229	5.02	8.02663	-16.5178	0.19	2.03186
1871	15.66	15.52	0.286	-0.173377	15.813	9.477	-1.07	9.97	-0.583	-3.02353	9.2605	6.556	12.5539	-0.86		0.4158	5.46	9.482	-21.6574	0.11	2.15235
1870	15.049	15.088	2.428	0.0400688	14.75	9.239	-0.08	10.88	0.866	-1.33813	8.6479	7.311	12.1329	-0.97		0.2773	5.25	8.45994	-19.0288	-0.11	5.9118
1869	14.675	15.175	0.164	-0.427892	15.322	9.336	-1.47	10.28	0.668	-2.15407	9.1972	7.213	11.4999	-0.02		0.0385	5.46	8.38733	-23.8349	0.2	6.03229
1868	15.189	14.517	0.283	-0.110942	15.405	9.241	0.35	10.25	0.043	-1.5898	8.2118	6.969	11.5621	-0.12		0.7418	5.24	9.44466	-19.4429	0.31	3.3332
1867	15.081	15.47	-5.585	-0.447022	14.503	9.508	-1.12	9.13	0.028	-1.55336	8.2957	7.536	12.0705	-0.57		-0.6336	5.23	9.55385	-14.7337	*	5.33342
1866	14.976	14.536	-1.19	-0.273364	15.948	9.927	-1.03	10.06	0.033	-1.97983	7.3528	7.076	10.8205	0.16		-1.3204	5.37	10.1198	-15.4748	0.1	4.08027
1865	15.074	15.327	-1.456	-0.0648861	16.072	9.944	-0.84	10.4	-0.012	-2.00659	8.6225	6.661	11.1236	-0.26		0.2902	5.53	10.1044	-13.4886	-0.02	2.44154
1864	15.572	14.025	-2.188	-0.184703	16.727	10.331	-1.33	10.76	0.34	-1.98211	8.8569	6.868	11.6356	0.09		0.3793	4.83	10.195	-12.6191	-0.05	2.87532
1863	15.759	14.54	-2.174	0.137719	16.546	10.107	-1.09	10.61	0.732	-1.70311	9.9634	6.082	11.1482	-0.36		-0.0915	5.37	9.06497	-14.8427	0.06	2.58614
1862	15.63	14.338	-1.665	0.252878	16.459	10.178	-0.76	10.24	0.484	-1.20831	8.1645	6.307	11.4378	-0.43		0.4392	5.4	10.1808	-22.3923	0.06	2.65843
1861	15.371	14.871	0.798	-0.648014	16.496	10.663	-0.33	11.88	0.127	-1.83691	8.7668	7.005	11.8111	-1.23		1.1936	5.63	10.3541	-13.7019	0.01	3.01992
1860	14.908	14.471	-1.493	-0.411547	16.546	10.048	-0.23	11.41	-0.568	-2.05271	7.9443	7.06	10.7313	-0.82		-0.273	5.33	10.6951	-12.8184	0.04	2.51384
1859	15.109	14.586	0.839	-0.282305	15.734	9.71	-0.59	10.3	-0.761	-2.46602	9.2639	6.811	11.0652	0.33		1.3025	5.24	8.86782	-12.8127	0	2.29695
1858	15.17	14.761	-0.894	-0.226276	16.224	10.572	0.43	11.47	-1.178	-2.71091	7.9484	7.39	11.6364	-0.59		0.8595	5.08	9.71078	-18.9	-0.09	2.51384
1857	15.294	14.476	-0.403	-0.358522	15.578	9.398	-0.32	10.05	-0.846	-1.90667	8.5164	7.235	9.73265	-0.01		0.7999	5.18	9.89939	-21.9683	0	2.08006
1856	15.056	15.272	0.499	-0.150163	16.373	10.304	-1.2	10.1	-0.885	-1.88276	9.0452	6.663	9.76683	-1.25		0.0281	5.26	9.99632	-14.3792	0.05	2.82713
1855	15.039	14.862	-3.617	-0.0616282	15.895	10.82	-0.08	11.1	-1.833	-1.70412	8.651	6.866	10.0375	-0.94		0.1409	5.41	9.66551	-14.5917	0.06	3.3332
1854	14.341	15.194	-1.084	-0.125221	13.712	11.179	-0.32	12.34	-1.898	-1.45777	8.4082	6.51	11.1133	-0.78		0.7419	5.04	8.07144	-25.8919	-0.09	2.24875
1853	14.507	14.54	0.241	-0.071232	15.619	10.373	-0.78	11.63	-1.213	-1.94849	8.792	6.401	10.7336	-0.49		0.1168	5.24	10.2944	-23.3592	-0.02	3.74289
1852	14.803	14.568	-0.057	-0.339586	15.532	10.798	-0.05	11.72	-1.55	-2.20477	9.4034	7.083	10.6948	0.68		0.8512	4.93	9.66551	-22.8971	-0.04	2.65843
1851	14.441	14.825	0.194	0.134373	15.005	10.388	-1.25	11	-1.918	-2.37655	8.0984	6.72	11.366	-0.56		0.0726	5.06	10.1352	-23.6791	-0.08	2.36924
1850	14.042	14.894	0.01	-0.534084	15.158	9.915	-0.31	11.1	-1.014	-1.85096	8.5385	6.499	11.3538	0.01		0.3266	4.91	9.41545	-16.6303	-0.19	3.79109
1849	14.619	14.798	-0.698	-0.354478	15.149	10.213	-0.74	10.8	-0.608	-2.0909	7.289	6.515	10.9327	-1.65		-0.434	4.8	9.93128	-28.2977	-0.05	3.16451
1848	15.228	15.102	-0.707	-0.137178	15.623	9.973	-0.92	10.52	-0.9	-1.66908	7.4499	7.347	10.3141	-1.34		0.3039	5.22	9.52181	-19.7006	-0.04	3.79109
1847	15.006	14.945	1.064	-0.424078	14.729	10.2	-0.2	11.31	-0.052	-0.896278	8.3862	6.893	9.79281	-0.1		0.0874	4.93	9.92314	-15.7176	0.02	2.94762
1846	14.813	14.701	0.924	-0.194659	14.532	9.671	0.35	11.12	-0.22	-2.4383	8.4177	7.411	11.2908	-0.35		0.9951	5.08	11.0268	-19.1592	-0.03	2.08006
1845	14.584	15.028	1.097	-0.283229	14.931	10.011	-0.1	11.1	-0.786	-1.66844	7.0199	7.249	10.7516	0.21		-0.1883	4.86	9.56987	-15.2836	0.05	2.24875
1844	14.857	14.77	0.857	-0.145111	14.367	9.41	-0.9	10.99	-0.642	-2.37665	7.5184	7.646	10.8823	-1.81		-0.4958	5.09	9.27672	-14.5537	0.01	2.15235
1843	14.871	14.361	-2.678	-0.360057	13.387	9.398	-0.77	10.21	-1.883	-2.76503	8.5152	7.126	9.03707	0.34		0.3297	5.2	8.3365	-13.4748	-0.16	3.16451
1842	14.717	14.784	0.313	-0.6428	13.58	9.352	-0.44	10.32	0.296	-1.84572	8.0182	7.108	9.91199	-0.01		-0.4094	4.92	7.83247	-15.4961	-0.01	2.20055
1841	15.079	14.342	-1.887	-0.0303693	15.409	8.794	-0.83	9.73	-1.005	-1.79762	8.609	7.789	9.96637	-0.44		-1.5436	4.96	9.77868	-13.1276	-0.14	4.08027
1840	14.635	15.175	-0.191	-0.323226	14.519	8.856	-0.59	10.31	-0.895	-1.96466	7.9572	8.138	9.63872	-0.47		-0.3791	5.29	8.84592	-16.4558	-0.04	4.00798
1839	14.205	14.499	-0.566	0.0943345	15.215	8.865	-0.66	8.79	-1.178	-2.17152	8.4089	8.23	9.96989	0.71		-0.8275	4.95	9.53783	-18.9999	-0.05	4.03208
1838	14.21	14.945	-2.965	-0.136767	15.104	8.986	-0.95	9.15	-1.853	-2.90782	6.1585	8.147	9.30199	-2.39		-0.7889	4.81	9.53783	-19.4705	0.03	2.27285
1837	14.273	14.462	-2.965	-0.045088	15.495	8.349	-0.09	8.51	-1.461	-3.96432	6.074	7.279	9.66292	-1.74		-0.1872	4.82	9.03576	-16.5619	-0.05	2.51384
1836	14.651	14.738	-2.717	-0.140306	14.808	9.725	-0.61	9.55	-2.017	-3.85105	7.5042	7.192	9.87412	-1.22		-0.3458	5.24	8.22758	-15.8971	0.08	2.51384
1835	14.978	15.24	-2.173	0.0194479	13.877	9.505	-0.22	9.72	-0.806	-2.46924	6.8526	7.598	9.57098	-1.11		0.889	4.98	7.60132	-13.0246	0.03	2.80303
1834	14.628	14.112	-3.799	-0.183338	15.009	10.091	0.62	10.5	-0.647	-2.28858	8.9425	7.427	11.2974	-0.43		1.0308	5.29	8.68528	-12.7051	*	2.08006
1833	14.773	13.546	-3.887	-0.371025	14.4	9.953	-0.94	10.03	-1.431	-2.78923	7.3576	7.908	10.9977	-2.35		0.1323	4.96	8.3728	-14.124	0.06	3.4055
1832	15.273	15.143	-0.987	0.0932862	14.684	10.359	-0.81	10.31	-1.823	-3.49332	6.7398	7.534	11.4975	-1.43		0.1137	4.84	9.30592	-13.199	0.02	2.77893
1831	15.042	14.407	-3.715	-0.583002	15.063	11.196	1.04	12.06	-1.342	-3.04747	8.4146	6.595	12.015	-0.49		0.5795	5.04	10.2234	-15.5323	0.04	2.41744
1830	15.324	14.563	-1.63	-0.170311	15.421	10.621	-0.16	10.76	-1.402	-2.63762	8.4279	7.137	11.7222	-0.79		0.2843	5.11	10.1584	-18.398	0.06	2.32105
1829	14.367	14.269	-1.296	-0.00510098	16.06	11.029	-0.2	11.43	-0.99	-3.07651	9.5014	8.02	11.2955	-0.42		-0.6064	5.25	10.2376	-15.43	0	2.75483
1828	14.946	14.471	-2.885	-0.224341	15.907	10.883	0.47	11.38	-1.218	-2.11384	8.0896	7.632	11.4514	-0.17		0.4683	5.77	10.4375	-16.2375	0	3.5019
1827	14.964	14.08	-0.135	-0.107086	15.738	11.029	-0.48	11.55	-1.268	-2.51158	8.2376	6.654	9.65981	-1.92		0.2454	4.57	9.57788	-19.2679	0.03	3.21271
1826	15.303	15.943	-0.823	-0.371355	15.438	11.225	0.84	12.83	-1.779	-2.06829	8.1161	7.06	9.99846	-1.17		0.7878	5.1	8.08637	-20.233	0.09	2.56204
1825	15.175	15.175	-3.731	-0.336829	16.134	9.939	-0.43	10.05	-1.555	-1.7579	8.8166	7.183	9.19526	-0.91		0.9304	4.9	7.72792	-15.4795	*	2.46564
1824	14.913	15.032	-1.821	-1.18163	16.113	10.122	-0.53	11.16	-1.813	-2.70459	7.7251	6.424	9.40052	-1.68		0.2492	4.93	8.88973	-26.721	-0.12	4.17667
1823	15.217	15.299	-0.933	-0.743189	16.237	10.317	-0.19	11.86	-1.863	-2.00382	8.7234	6.396	9.56361	-0.46		-0.7787	5.06	10.0812	-20.6438	-0.07	2.48974
1822	15.109	14.825	-1.516	-0.477016	15.598	9.292	0.06	10.36	-2.111	-2.43621	8.741	6.389	11.8548	-0.93		0.0767	4.83	8.30019	-20.6686	-0.05	4.32126
1821	15.254	15.488	-3.016	-0.621641	15.294	9.439	-1.11	9.79	-4.032	-2.7523	8.0319	6.449	10.8672	-1.32		0.2619	4.77	9.17449	-14.7299	-0.03	3.3814
1820	15.502	15.313	-6.243	-0.719231	15.195	9.725	-0.06	11.12	-3.456	-2.67921	7.5317	6.884	10.3608	-0.47		0.627	4.78	8.69258	-22.2061	-0.04	5.7672
1819	15.287	15.562	-4.672	-0.425722	14.033	10.263	0.77	11.54	-3.426	-2.75176	7.0963	6.973	9.51424	-1.45		0.7589	4.85	8.2421	-17.6255	-0.04	2.65843
1818	15.004	15.194	-7.154	-0.674102	16.22	10.067	-0.59	10.41	-3.431	-2.84189	6.5719	7.085	11.1028	-2.24		0.3525	4.88	8.7948	-15.7294	0.02	3.09221
1817	15.161	16.206	-3.452	-0.503899	15.874	9.742	-0.42	9.9	-3.138	-2.52375	8.6732	7.119	10.1659	0.22		-0.5761	4.67	8.07891	-11.9225	0.04	2.51384
1816	14.252	15.934	-6.637	-0.576807	15.425	9.41	-0.94	10.23	-3.198	-3.15233	8.9973	7.336	10.0522	-0.61		-1.7696	4.83	8.7583	-15.6824	0.05	2.65843
1815	14.301	16.266	-3.851	-0.250795	15.359	8.984	-0.37	9.83	-3.099	-3.09331	7.8617	6.554	12.391	-1.37		0.0698	4.99	8.64877	-17.2807	-0.01	1.91136
1814	14.999	16.049	-1.588	-0.153269	14.231	8.916	-0.15	10.16	-1.843	-3.76335	8.8354	6.291	11.9936	-0.79		-0.0193	4.95	6.93725	-18.1126	-0.05	1.79087
1813	15.375	16.371	-0.96	-0.0560705	13.947	8.649	-0.16	9.73	-2.459	-3.36946	6.6206	6.348	12.0836	-2.36		0.25	5.43	6.69471	-15.0873	-0.09	4.44176
1812	15.52	16.054	-3.272	-0.0842179	15.302	8.539	-0.94	8.65	-0.766	-2.6539	8.7883	6.481	12.1814	-0.31		-1.1339	4.74	7.84741	-17.3801	-0.05	2.63433
1811	15.852	15.769	-1.732	-0.0754231	16.43	9.229	-0.24	9.92	-0.727	-3.35885	6.8268	6.2	14.2808	-1.69		0.2459	4.9	10.634	-14.6401	-0.04	3.4055
1810	15.483	14.577	-1.901	-0.316011	15.693	9.079	-0.62	9.42	-2.042	-3.14788	6.2418	6.141	13.8254	-1.65		-0.7133	5.1	10.1044	-15.6578	-0.02	2.99582
1809	15.504	14.706	-1.07	-0.169916	15.804	9.218	0.38	10.3	-1.65	-2.65039	6.9545	6.419	12.9586	-0.68		-0.4033	5.05	9.80131	-15.5739	0.04	1.86317
1808	15.219	14.444	-0.614	-0.127382	15.413	9.43	0.22	11.18	-0.33	-3.22299	8.9801	7.144	13.137	0.43		0.0306	5.25	10.3086	-15.9318	0	2.15235
1807	14.908	13.344	-0.125	-0.159044	14.21	9.195	0.06	10.19	0.211	-2.46273	8.6923	6.784	14.7115	-0.64		-0.9368	5.39	10.544	-16.5955	0.04	2.44154
1806	15.137	16.224	-2.295	-0.0575496	16.253	8.672	-0.07	9.58	-1.034	-3.2072	7.0962	7.101	14.4692	-1.88		-0.2635	5.26	10.4233	-16.1712	0.08	2.75483
1805	14.743	15.221	0.325	-0.196888	15.866	9.685	-0.32	11.25	-0.995	-2.41497	8.1844	7.979	14.6172	0.61		-0.6113	5.01	9.78622	-19.1275	0	2.17645
1804	15.175	14.986	-2.109	-0.0980335	16.167	9.555	0.47	11.55	-0.528	-2.88747	8.8943	8.309	13.802	-0.81		-0.549	5.27	9.91499	-17.2718	0.02	2.82713
1803	15.401	15.713	0.192	-0.239317	15.71	8.712	-0.69	10.47	-0.131	-2.93069	8.3867	7.794	14.7268	0.1		-0.6722	5	10.7431	-20.9579	-0.07	2.58614
1802	15.27	15.286	-0.011	-0.0142214	15.096	9.382	-0.97	10.55	0.072	-2.0823	9.4802	7.288	14.1244	-0.6		-1.4414	4.92	9.62593	-17.0968	-0.06	2.39334
1801	15.616	15.184	-0.202	-0.50692	15.158	9.462	-0.27	10.87	-1.034	-1.903	6.5108	7.4	13.9504	-2.03		-1.3106	5.24	9.24751	-16.3803	-0.03	1.86317
1800	14.838	14.163	-1.272	-0.124424	15.405	9.023	-0.56	9.91	-0.424	-1.68038	8.8709	6.941	13.4846	-0.2		-0.3623	5.34	9.51381	-16.1123	0.02	3.04402
1799	14.922	13.5	-2.086	-0.287455	15.784	10.024	-0.76	11.8	-0.424	-2.9374	9.3365	7.244	15.2015	-1.14		-2.4055	5.13	10.0118	-17.365	0.01	3.01992
1798	14.943	14.052	0.442	-0.110136	15.475	9.741	0.26	11.69	0.648	-2.5957	9.9038	7.363	13.2272	0.48		-0.3413	5.63	10.2305	-18.9191	-0.04	2.32105
1797	14.64	14.954	-0.353	-0.568917	14.49	9.622	-0.26	10.66	0.092	-3.10594	7.803	8.419	13.7854	-1.5		-0.8744	5.03	7.7802	-19.7878	-0.06	2.73073
1796	14.862	14.48	1.157	-0.856827	15.454	9.489	-0.5	11.73	-0.077	-2.34907	9.3291	7.634	12.3468	0.59		-0.5199	5.51	9.65797	-17.7875	-0.01	1.57398
1795	14.5	15.023	-1.037	-0.867515	15.302	9.431	-0.89	10.78	-1.168	-3.29747	8.2932	8.41	12.1832	-1.53		-0.4647	5.31	9.48978	-17.0433	-0.04	1.74267
1794	14.577	15.608	0.713	-0.408215	14.964	9.322	-0.75	10.93	-0.28	-3.41262	9.3345	7.555	11.3394	-0.04		0.1405	5.32	9.90693	-14.8942	-0.02	2.68253
1793	14.705	14.825	1.398	-0.430547	15.265	9.028	-0.92	10.57	-0.503	-3.02556	8.1867	7.906	10.9764	-0.68		-0.7845	5.26	9.23291	-17.843	-0.03	2.36924
1792	14.675	14.227	-0.168	-0.736624	13.012	9.456	-0.86	10.61	-0.856	-2.84015	8.8681	7.881	11.5913	0.41		-0.0977	5.54	7.90715	-15.8064	0	2.53794
1791	15.263	14.237	0.591	-0.576402	15.026	9.233	-1.03	10.36	-0.007	-2.2267	8.5556	7.267	11.2892	-0.39		-0.0723	5.89	9.70324	-17.5621	0.01	1.74267
1790	15.889	14.922	0.389	-0.596911	14.948	9.474	-1.41	9.33	-0.29	-2.58324	7.8528	6.706	12.1544	-0.32		-0.9859	5.2	9.86921	-17.7664	-0.12	1.86317
1789	15.34	14.347	-1.651	-0.883706	14.733	9.555	-0.49	11.32	-0.275	-2.75517	7.8214	7.042	11.0833	-0.85		-0.1494	5.01	8.81671	-18.7439	-0.09	2.48974
1788	14.866	15.281	-2.496	-0.513947	13.992	9.236	-0.79	10.76	0.395	-2.70987	8.2176	7.377	10.5186	-0.91		-0.3226	5.39	7.39205	-16.7443	-0.09	2.39334
1787	14.189	15.433	0.466	-0.736597	14.791	9.197	-1.38	10.17	0.092	-2.48842	6.6717	7.094	12.2897	-1.71		-0.9767	5.27	9.83149	-21.1754	-0.04	2.15235
1786	15.179	14.789	-0.927	-0.486343	15.887	9.04	-1.51	10.89	-0.082	-3.44451	8.5831	7.057	13.1759	-0.91		-1.2378	5.76	10.004	-19.8442	-0.04	2.73073
1785	14.483	14.08	0.933	-0.201946	14.033	9.904	-1.33	10.75	0.276	-2.02099	8.1736	7.737	12.3325	-1.91		-0.8224	4.86	8.69258	-22.4259	-0.09	2.92352
1784	14.493	14.517	-0.859	-0.0803273	14.738	9.587	-1.74	10.16	1.65	-0.925263	7.705	7.26	12.436	-1.55		-1.0196	5.29	10.1275	-20.8908	-0.1	2.51384
1783	14.953	13.767	-4.676	-0.18017	14.107	9.384	-1.13	9.78	0.137	-1.71413	8.2952	7.126	11.5393	-1.02		-0.2988	5.2	9.5058	-17.5576	-0.02	2.05596
1782	14.873	14.14	2.114	-0.273047	16.191	9.966	-0.89	10.76	0.365	-2.38327	7.0089	6.982	13.0774	-1.48		-2.6142	5.08	10.9664	-14.3503	-0.03	1.98366
1781	15.14	14.867	0.852	-0.144611	16.92	9.605	-0.61	10.41	0.092	-1.39447	7.9863	6.902	12.3906	-0.92		-0.3195	5.58	11.1608	-17.1883	0.02	1.93546
1780	14.934	15.148	0.997	-0.124048	15.998	10.581	-0.41	11.58	0.286	-0.82045	8.3926	7.42	11.5616	-0.42		0.0039	5.5	10.5156	-14.7638	0.08	2.05596
1779	15.165	14.835	1.403	-0.433801	16.949	10.124	0.03	11.53	-1.63	-1.63255	6.5734	6.975	11.4199	-0.82		0.7949	6.04	10.6879	-17.6951	0.03	2.03186
1778	14.96	15.005	1.932	-0.239485	16.665	10.289	-0.21	10.8	-0.082	-0.601771	8.1306	6.761	11.7771	-0.76		-0.3943	5.71	10.0889	-20.8254	0.05	2.87532
1777	15.144	14.094	0.491	-0.330496	16.282	9.967	-0.33	10.94	-1.188	-0.299466	7.2335	7.317	12.0923	-1.11		-0.8648	6.03	10.7108	-19.5262	-0.09	4.20077
1776	14.869	14.536	-2.591	-0.529249	16.504	10.194	0.58	11.93	-0.464	-0.548049	9.1138	6.925	11.5848	0.4		-0.4145	6.31	9.53783	-17.8996	-0.02	2.85122
1775	14.971	14.319	1.861	-0.276215	15.409	10.484	0.53	11.6	-0.126	-0.732938	7.8752	6.923	12.2027	-0.28		-0.2564	6.06	9.39354	-15.5708	-0.05	2.56204
1774	15.086	14.664	0.504	-0.567257	15.458	10.303	0.11	11.29	-0.543	0.661315	9.9295	7.723	11.8504	-0.44		-0.6677	5.83	9.60992	-16.0783	0.03	2.99582
1773	15.646	14.329	-1.053	-0.167597	16.529	9.593	-0.1	11.01	-1.049	-0.253183	9.5021	7.304	11.8614	0.99		-0.5585	6.12	10.5085	-15.2446	-0.03	3.3332
1772	15.275	14.674	-3.15	-0.130556	15.973	9.772	-1.33	9.6	-1.163	-0.800699	9.2314	7.279	11.5315	-0.29		-1.4993	6.31	8.28567	-18.318	-0.01	2.70663
1771	15.558	14.154	0.458	-0.173441	15.878	9.411	-0.57	10.14	-1.416	0.188505	8.8651	7.112	11.2449	-0.61		-1.227	5.34	9.17449	-15.3216	-0.02	2.44154
1770	15.245	14.264	-3.672	-0.934294	15.788	9.516	-0.32	10.33	-1.203	-1.31632	8.3931	6.829	10.1447	-0.34		-0.4202	5.5	11.1398	-14.1369	-0.08	1.81497
1769	14.95	14.112	1.009	-0.710257	15.557	9.131	-0.27	9.75	-0.265	-0.682653	8.0437	6.727	12.4389	-0.86		-0.3958	5.14	10.3927	-16.1831	-0.12	2.89942
1768	15.228	14.338	-0.676	-0.637989	15.059	9.877	-0.45	9.99	-1.039	-1.24109	8.977	6.515	12.3415	0.98		-0.165	5.42	10.195	-19.6757	-0.14	1.95956
1767	15.142	15.111	2.459	-0.253131	15.611	10.944	-0.34	11.13	-0.116	-1.82238	8.1969	7.746	11.1391	-0.59		-0.2453	5.4	11.2096	-17.7773	-0.05	2.89942
1766	14.883	14.568	-2.26	-0.980782	15.788	12.114	0.31	12.03	-0.662	-1.98525	7.6347	7.427	11.9463	-0.75		0.441	5.37	11.1887	-23.2701	-0.02	4.12847
1765	14.787	15.161	-0.003	-0.390626	15.265	11.243	-0.51	10.97	-1.198	-2.75779	9.1019	7.819	11.0716	-0.7		0.3326	4.99	11.0769	-15.2374	-0.1	2.51384
1764	14.514	14.637	0.247	-0.165339	14.643	11.228	-0.31	11.03	0.529	-2.0365	8.1181	6.722	10.4432	-1.15		-0.2303	5.17	9.42275	-11.2375	0.07	3.04402
1763	14.665	15.474	-2.396	-0.200971	15.071	11.95	-0.49	11.61	0.42	-1.56708	7.4481	7.76	13.2043	-0.77		-0.5275	5.11	10.5085	-11.1624	0.02	2.61023
1762	14.483	15.194	0.188	0.0127738	15.598	12.212	-0.3	12.12	-0.945	-1.10617	7.2903	7.438	11.8385	-1.57		-0.2211	5.52	11.3912	-13.5569	0.14	4.34536
1761	14.689	14.858	0.447	-0.028946	16.842	12.017	0.14	12.93	-0.642	-0.816102	7.3893	7.329	11.3021	-0.68		-0.0906	5.89	10.4872	-16.3803	-0.03	2.17645
1760	14.813	14.618	-0.994	-0.151049	15.775	11.449	-0.27	12.22	-0.394	-0.983531	7.3034	6.907	12.1533	-0.91		-0.219	5.52	10.9581	-16.0488	0	2.41744
1759	15.049	14.729	-1.182	-0.182666	16.352	10.978	-0.65	11.8	-0.861	-1.65983	8.8562	6.611	12.4852	-0.76		-0.3756	5.59	11.2585	-18.3674	0	1.81497
1758	14.974	15.184	0.9	-0.566813	15.495	11.297	0	11.66	-1.302	-1.43762	7.8767	6.663	11.9457	-0.23		-1.3206	5.59	10.2802	-18.0061	-0.01	3.64649
1757	14.82	15.051	1	-0.310932	15.335	11.222	0.29	12.06	0.226	0.995155	9.0312	6.116	12.6692	-0.56		-0.9555	5.4	11.6369	-14.6813	-0.05	2.94762
1756	14.275	15.299	1.077	-0.332942	15.763	10.875	-0.61	11.27	-0.419	-0.699628	9.3598	5.812	11.2277	-0.18		-0.7236	5.21	10.7512	-10.2366	-0.1	3.04402
1755	14.757	14.747	-2.885	-0.430209	16.228	11.067	-0.2	12.46	-0.091	-0.741182	7.5177	5.765	13.0448	-1.06		-1.4438	4.94	11.5267	-9.7518	-0.05	2.24875
1754	15.497	15.143	1.036	-0.433187	14.923	10.132	-0.56	11.92	-0.295	-0.939318	7.9059	5.885	13.0331	-0.17		-0.7218	5.58	10.0966	-15.2763	-0.07	2.61023
1753	14.892	15.704	-2.122	-0.411991	16.093	10.118	-0.35	11.51	-0.687	-2.51023	8.4124	6.608	11.95	0.19		-0.6655	5.43	11.0979	-17.1747	-0.09	3.11631
1752	14.687	15.263	-2.649	-0.24257	16.093	9.874	0.72	11.71	-0.538	-1.99046	7.4577	6.8	11.6193	-1.66		-0.5353	5.06	11.0268	-19.3404	-0.08	5.55031
1751	14.63	14.618	-0.109	-0.12353	15.046	9.108	-0.33	11.33	-0.826	-3.68721	8.3641	7.199	12.5686	-0.21		-0.6942	5.33	9.56987	-14.1958	-0.1	2.27285
1750	14.729	15.226	-2.128	-0.490151	14.425	9.294	0.29	11.71	-1.625	-2.45553	7.9057	7.457	12.2685	-0.13		-0.0358	5.65	8.73639	-14.889	-0.1	2.05596
1749	15.495	15.805	-2.609	-0.476683	14.865	9.467	0.09	11.22	-0.92	-0.613122	7.1258	7.181	12.669	-2.08		0.0704	5.75	10.5795	-17.233	-0.12	2.89942
1748	15.198	15.405	-1.401	-0.248638	15.491	9.633	-0.24	10.66	-0.057	0.593432	8.4037	6.875	12.1562	-0.37		-0.3294	5.9	11.2655	-18.0295	-0.04	1.79087
1747	14.441	15.405	-1.25	-0.190323	15.014	9.273	-0.66	10.29	-1.411	-0.997388	9.1489	6.827	11.5637	-0.45		0.1576	5.72	10.473	-17.9835	-0.03	1.79087
1746	14.488	15.189	-1.574	0.0274462	12.785	9.585	-0.3	11.19	-0.747	-1.65969	7.4053	6.173	12.6424	-1.97		-0.6085	5.65	8.64148	-16.1861	-0.05	2.27285
1745	15.52	14.071	-0.782	-0.241268	15.129	9.095	-0.46	10.18	-1.526	-1.95513	8.0112	6.72	12.6766	-0.4		-0.1186	5.17	9.83903	-19.9983	0.18	5.26112
1744	15.513	14.034	-0.252	-0.0422235	16.422	9.376	-0.25	10.87	-1.342	-2.94647	7.7644	6.159	11.7529	-2		-0.6824	5.21	10.3772	-15.8195	-0.02	3.83928
1743	15.826	14.227	-0.67	-0.236683	16.933	9.533	-0.97	9.94	-1.65	-2.23712	9.2062	6.921	12.0423	-0.74		-0.1411	5.44	10.385	-14.3838	-0.11	3.3814
1742	15.595	14.269	-4.473	-0.0544895	16.78	9.628	-1.62	9.8	-0.206	-2.7039	8.6147	6.934	13.7754	-1.2		-0.5973	5.33	10.8714	-14.0795	-0.03	2.73073
1741	15.572	14.77	-3.372	-0.195563	16.113	8.885	-1.33	9.42	-1.362	-2.80221	9.3788	6.93	14.131	-0.42		0.0819	5.33	9.29862	-10.7765	0.12	2.29695
1740	15.336	14.683	-1.086	-0.249834	17.369	9.435	-0.6	10.25	0.122	-2.07096	7.5511	6.788	14.3947	-0.46		-0.8721	4.85	9.99632	-14.4404	0	2.24875
1739	14.343	14.338	-2.662	-0.19133	17.11	10.575	-0.66	10.47	1.258	0.42489	9.4837	7.142	14.5634	-0.48		0.1671	5.25	10.5298	-16.1168	-0.04	2.24875
1738	14.43	14.324	-2.662	0.0480685	17.106	10.299	0.36	11.22	0.033	0.767743	6.9516	6.588	11.3263	-2.49		0.8173	5.16	9.64996	-15.1314	-0.02	2.36924
1737	14.565	14.793	-0.96	-0.0603454	16.842	9.435	-0.57	9.83	-0.057	-0.190663	8.4427	7.19	13.8604	-1.17		-0.0823	5.4	10.3086	-15.9559	0.03	4.51406
1736	14.715	14.807	-2.517	0.207971	17.011	9.907	0.23	11.35	-0.022	-0.640797	7.5431	6.741	13.2288	0.06		0.7228	4.92	6.71676	-17.9489	-0.04	4.89964
1735	14.612	13.947	-0.417	0.189472	16.752	9.32	-0.05	10.3	-0.697	-1.18936	8.6653	6.896	11.8237	-0.98		0.7635	5.96	8.56887	-14.99	-0.02	2.94762
1734	14.591	14.043	-1.447	-0.027362	17.386	8.608	-0.33	9.21	-0.34	-1.73564	8.5383	6.82	12.9437	0.15		0.6966	5.64	11.6736	-14.2297	0.04	3.18861
1733	14.971	13.698	0.722	-0.295642	14.338	9.417	-0.83	10.22	-0.146	-2.22228	8.4008	7.406	14.4243	-0.7		0.5636	5.78	9.77868	-11.8164	0.1	3.01992
1732	15.558	13.974	-4.684	-0.202054	16.093	9.304	-0.21	10.73	-0.965	-1.79193	7.3276	7.288	14.2205	-0.92		-0.0735	4.95	9.80886	-14.642	0.02	2.77893
1731	15.303	15.028	-1.105	-0.294841	15.994	9.225	-0.58	9.77	-0.082	-2.03508	7.0133	6.891	13.1744	-2.26		0.456	5.76	10.3086	-14.3611	0.02	3.11631
1730	14.834	13.675	-3.533	0.0944695	16.389	9.314	0.13	11.36	-0.052	-1.42626	8.3457	7.037	12.4561	-0.52		0.3809	5.63	11.3074	-15.3141	-0.01	2.10416
1729	14.275	14.954	0.598	-0.420384	16.471	8.82	-0.66	10.32	0.36	-1.91842	7.9882	7.42	14.3264	-1.85		0.1264	5.54	11.2166	-18.2043	0.07	3.06812
1728	15.116	14.798	-0.725	-0.285614	15.244	8.521	-0.99	9.22	0.291	-0.324902	8.7693	7.333	13.0838	-0.96		-0.0872	5.2	10.3772	-13.3085	0.03	2.15235
1727	15.016	14.31	0.734	-1.05312	15.499	9.412	-0.04	10.25	-0.146	-0.0569736	6.8633	6.991	13.2944	-0.73		0.8509	5.69	10.5511	-16.3719	0.04	2.15235
1726	15.149	14.646	0.103	-0.118267	15.635	9.032	-0.53	10.18	-0.295	-1.22519	7.675	6.994	13.4607	-0.2		0.022	5.49	10.473	-20.2873	0	3.21271
1725	14.474	15.069	-2.001	-0.510487	16.9	9.392	-0.62	10.82	-0.761	-2.14298	6.5486	7.229	14.0122	-1.15		-0.9944	5.5	11.034	-18.2128	0.03	2.08006
1724	14.887	15.364	0.622	-0.123746	15.742	9.052	-0.68	9.81	-0.111	-2.02799	9.0578	7.591	12.7499	-0.18		-0.8614	5.56	10.0503	-20.6317	0.04	3.76699
1723	14.857	14.982	-2.915	-0.604854	15.504	8.641	-0.99	9.54	-1.665	-2.52596	7.679	8.207	13.3232	-0.98		-0.4391	5.22	10.7512	-11.0414	0.09	2.24875
1722	14.679	15.7	-1.296	-0.266169	16.756	9.239	-1.3	10.26	-0.925	-1.97741	8.5197	7.664	11.756	0.19		-1.2737	4.96	11.6442	-7.2728	0.08	3.04402
1721	15.238	15.773	0.02	-0.848322	15.154	8.763	-0.33	10.15	-1.794	-2.02797	8.3542	7.653	11.8507	-0.71		-0.3091	5	9.87675	-12.0605	0.05	2.56204
1720	14.633	15.074	-0.278	-0.423501	15.631	8.674	-0.43	9.75	0.087	-1.01109	8.2332	7.472	12.9482	-0.73		-0.861	5.22	10.3541	-6.0729	0.01	2.63433
1719	14.612	13.96	0.48	-0.418546	15.417	8.846	-0.44	9.1	-0.771	-1.02602	8.0546	7.682	13.0722	-0.34		0.013	5.46	9.93942	-14.8776	0.04	3.26091
1718	14.687	14.664	-3.002	-0.322467	15.491	9.332	-0.36	9.89	-1.516	-1.95748	8.6127	7.057	12.2748	-0.28		-0.5441	5.55	10.5582	-15.2054	0.01	2.24875
1717	15.684	15.171	-2.424	-0.674739	16.15	9.08	-0.74	9.85	-2.166	-2.3755	8.2461	6.51	12.2711	-1.21		-0.743	5.01	10.195	-13.8071	0.01	2.12825
1716	15.457	14.577	0.576	-0.314167	15.722	9.169	-0.79	10.03	-1.153	-2.26876	8.1235	6.389	12.7861	-0.9		-0.8058	5.06	10.2589	-15.8671	-0.01	2.03186
1715	14.985	15.111	1.021	-0.863662	15.755	9.402	0.09	10.94	-0.756	-1.74311	7.3288	7.178	13.8048	-1.35		-0.3443	5.43	10.0426	-12.5386	0.02	1.81497
1714	14.834	14.499	-3.822	-1.07662	16.138	9.465	-0.43	10.22	-0.642	-0.346068	7.543	6.788	13.1328	-0.31		-0.0956	5.04	10.5945	-18.4966	-0.13	3.06812
1713	15.289	15.359	-1.335	-0.930714	15.199	9.896	-0.56	10.31	-0.756	-1.2673	7.7985	7.345	12.7558	-0.79		-0.2186	5.11	11.6148	-18.27	0.04	2.12825
1712	15.189	15.465	-0.489	-0.63256	14.952	9.744	-0.27	10.19	-0.469	0.591159	8.1667	7.144	13.045	-0.44		0.1091	4.94	10.385	-18.0454	-0.02	1.95956
1711	15.135	14.715	-1.229	-0.56027	15.236	9.445	-0.52	10.99	-0.647	-0.303594	7.7089	6.481	14.2547	-1.32		-0.6587	4.92	10.7593	-16.8787	0.05	2.87532
1710	15.02	14.204	0.087	-0.686792	14.791	9.37	-1.04	9.93	-0.702	-1.50359	7.1669	6.672	12.6546	-0.54		-0.8846	5.24	10.0735	-17.2359	0.01	2.29695
1709	15.31	13.675	-0.641	-0.0919062	15.261	8.832	-0.98	9.34	-1.387	-2.34183	7.0987	6.829	12.8771	-1.61		-0.9371	5.28	10.4872	-15.8895	0	2.08006
1708	15.667	14.154	-0.432	-0.539151	15.458	9.448	-1.09	9.7	-1.362	-0.535367	7.3637	6.743	12.3572	-0.91		-0.9022	5.44	10.7512	-16.5495	-0.11	2.12825
1707	15.371	15.419	0.422	-0.585014	15.314	9.947	-0.33	11.36	-0.543	-0.173434	7.3268	6.658	13.8525	-1.08		-0.9182	5.11	10.1584	-14.365	-0.03	2.92352
1706	15.081	14.724	-3.159	-0.713474	15.108	8.77	-0.98	9.94	-0.766	0.0867073	8.0999	6.225	13.675	-0.6		-0.6566	5.12	9.38624	-12.7837	-0.02	2.17645
1705	15.721	15.166	-0.967	-0.460204	14.396	8.971	-1.05	9.62	-1.615	-0.721386	7.7117	6.759	12.3669	-0.78		-1.0017	4.97	9.89184	-15.6964	-0.02	2.08006
1704	15.231	15.111	-0.731	-0.246603	14.787	10.198	-0.82	10.93	-1.332	0.556154	7.7352	6.718	10.9719	-1.29		-1.1428	4.96	9.65797	-14.8973	-0.09	3.18861
1703	14.726	15.079	-0.689	-0.407174	14.989	10.499	0.46	11.57	-1.684	0.0683978	7.57	6.973	11.9297	-1.4		-1.0565	5.05	9.66551	-12.6764	-0.06	2.82713
1702	14.99	15.286	-0.564	-0.165458	14.387	10.153	0.13	11.11	-1.739	-1.42713	7.0806	6.64	10.9092	-1.52		-0.8882	5.35	8.09384	-13.5124	-0.07	2.97172
1701	14.411	14.586	-1.467	-0.454479	14.713	9.831	-0.7	9.81	-1.878	-0.296992	7.2514	6.668	10.2437	-2.92		-1.0337	4.67	9.34973	-20.3077	-0.08	3.28501
1700	14.831	14.747	-1.489	-0.0583039	14.066	9.523	-0.41	10.88	-1.689	0.0824547	6.8455	6.118	10.0148	-1.8		-1.5602	5.16	10.3772	-16.2756	-0.03	3.4537
1699	14.775	15.203	-4.094	-0.636923	13.638	9.479	-0.67	10.16	-2.508	-1.10076	6.373	5.739	9.98014	-3.28		-1.2666	4.85	8.81671	-15.0462	0.02	2.75483
1698	14.834	15.631	-4.219	-0.457418	15.17	9.71	-0.5	11	-1.888	-0.664291	6.8055	5.655	11.178	-1.79		-2.4737	5.3	8.84592	-14.9516	-0.01	4.77914
1697	14.563	15.309	-2.119	-0.155602	14.861	9.437	-0.29	9.59	-1.67	-0.757536	7.6848	6.139	11.0117	-2.18		-1.5593	5.23	10.1584	-14.7058	-0.06	2.32105
1696	15.074	15.051	-0.053	-0.307067	14.771	9.248	-0.87	9.26	-2.151	-1.42083	7.6791	6.702	11.6251	-2.29		-1.9331	5.37	10.3772	-17.2728	-0.06	3.83928
1695	14.425	14.384	1.077	-0.235442	15.483	9.796	-0.91	9.59	-1.804	-1.15739	6.8125	7.655	11.6499	-1.39		-1.7168	5.57	9.35704	-14.5961	-0.03	3.526
1694	14.808	15.019	-3.328	-0.463065	16.467	10.287	0.01	11.14	-0.851	-0.985185	7.8337	7.605	12.152	-1.31		-0.5405	5.75	11.2795	-18.7051	-0.04	2.48974
1693	14.827	14.503	-1.251	-0.515487	15.458	10.283	0.35	11.35	-1.287	-1.01675	8.1226	7.322	13.0888	-1.32		-0.4178	5.64	9.17449	-16.9731	-0.11	2.36924
1692	14.504	13.905	-1.262	-0.334872	15.434	9.865	-0.26	11.44	-1.119	-1.41662	7.9603	7.317	12.5767	-0.79		-1.5571	5.86	10.9911	-12.9083	-0.06	2.36924
1691	15.317	14.871	-1.341	-0.119233	14.787	9.529	0.1	10.89	-0.905	-1.7319	8.4755	6.857	13.1383	-0.39		-0.8584	5.52	10.4872	-11.839	-0.17	2.32105
1690	15.24	14.674	0.058	-0.148311	15.475	9.291	-0.33	10.18	-0.851	-1.75647	8.4305	6.973	12.3693	-1.66		-0.3905	5.5	9.97198	-14.6035	-0.11	2.10416
1689	14.908	14.715	-3.077	-0.497329	15.327	9.675	0.24	11.77	-1.471	-1.00918	9.1483	7.349	14.0931	-0.39		-0.1607	5.16	10.8787	-11.9372	0.03	2.27285
1688	15.107	14.724	-1.234	-0.269875	14.21	8.699	-0.51	9.78	-0.548	-0.551729	7.4144	7.251	12.4991	-2.39		0.2687	5.25	9.62593	-12.9355	0.03	1.98366
1687	14.406	15.405	-0.213	-0.655905	15.635	9.235	-0.6	9.61	0.494	-0.219907	8.2986	7.441	12.8427	-0.61		-0.3727	5.08	10.8787	-14.6753	0.02	1.62218
1686	14.588	15.437	-0.303	-0.507364	15.574	9.169	-0.59	10.08	-0.369	-0.949031	8.3997	7.32	12.9589	-1.21		-0.7671	5.61	11.0626	-16.8927	-0.04	3.01992
1685	14.796	15.221	0.149	0.0788433	14.787	9.369	-0.76	10.62	-1.407	-0.392676	7.1674	7.397	12.9703	-1.97		-0.615	4.73	9.43735	-12.8116	-0.03	2.82713
1684	15.198	15.502	-2.207	-0.600191	15.359	9.572	-0.05	10.41	-0.121	-0.361256	8.0742	7.311	13.8275	-0.01		-0.5672	5.54	9.85412	-16.0813	-0.07	2.00776
1683	14.481	15.608	-2.17	-0.050132	16.023	9.731	-0.67	10.29	-0.27	-0.837275	7.4373	7.587	11.2562	-1.05		-0.6664	5.5	11.3493	-15.6841	-0.05	3.01992
1682	14.82	15.281	-2.054	-0.241147	16.01	9.595	-0.41	9.83	-0.682	-2.34446	7.4902	6.861	11.3452	-0.77		-1.002	5.87	11.0197	-15.3602	-0.05	3.28501
1681	14.418	14.503	-0.282	-0.62137	16.294	8.882	0.15	9.46	-0.712	-1.29293	8.2793	6.442	12.1977	-0.44		-0.951	5.67	10.886	-13.6	0.01	2.36924
1680	14.904	14.094	-1.897	-0.258182	15.635	8.548	-0.12	8.55	-1.307	-2.01741	7.7442	5.942	12.5956	-0.39		-0.3109	5.57	10.6576	-16.3854	0.07	3.59829
1679	15.046	14.927	-4.078	-0.257939	15.627	9.616	-0.19	9.77	-0.826	-0.896939	8.0036	5.692	10.9191	0.08		-0.8541	5.32	10.4801	-15.2703	0.06	3.28501
1678	15.359	15.447	-0.005	-0.48873	15.965	9.26	-0.63	9.95	-1.853	-1.36982	7.3669	6.214	12.6447	-0.91		-0.8322	5.97	9.98013	-17.513	0.03	1.95956
1677	14.908	14.908	-2.035	-0.188912	15.553	9.481	-0.73	10.27	-2.419	-1.5294	7.8522	5.917	11.9485	-2.12		-1.4819	5.6	9.63394	-17.4035	0.03	2.77893
1676	14.416	14.94	-2.035	-0.613935	15.734	9.446	-0.28	9.9	-1.426	-1.35513	7.5124	6.341	13.0636	-1.21		-0.2718	5.64	8.69258	-20.5486	0.05	2.32105
1675	14.799	16.086	-1.521	-0.485406	14.659	9.297	-0.88	9.03	-2.92	-1.65754	8.0218	6.741	12.6401	0.01		-1.0171	5.44	8.7583	-17.1682	0.05	2.15235
1674	14.696	14.835	-0.866	-0.228689	15.878	9.462	-0.91	9.9	-0.99	-1.3899	6.1417	6.54	12.4362	-2.83		-0.966	5.47	9.62593	-15.4814	0.05	2.61023
1673	14.822	15.741	-1.455	-0.154187	14.297	9.764	-0.69	10.24	-0.637	-1.32237	6.5973	6.768	12.0096	-0.24		-0.3468	5.28	8.91163	-13.603	0.05	2.87532
1672	14.488	15.171	0.872	-0.834931	16.735	9.665	-0.97	9.62	-0.781	-2.92538	7.4926	6.772	12.1014	0.21		-0.5956	4.98	10.3086	-15.4848	0	2.41744
1671	15.039	14.779	2.028	0.104287	16.08	9.97	-0.41	10.61	-0.97	-1.87589	7.2347	7.219	13.0449	-1.06		-0.8242	5.01	9.86921	-13.7893	-0.07	2.00776
1670	15.147	14.237	0.921	-0.0724066	15.495	9.538	-0.75	10.11	-1.228	-2.92777	6.7309	6.989	12.4434	-1.75		-0.4203	4.91	8.88973	-17.826	-0.07	3.79109
1669	15.256	14.646	-0.971	-0.11678	15.578	9.345	-0.32	9.52	-0.667	-2.5988	6.6527	7.023	12.0367	-0.76		-0.4771	5.19	9.44466	-21.5661	0	2.53794
1668	15.833	13.772	-1.017	0.0366656	15.421	9.744	-0.41	10.58	-1.188	-2.74107	7.2794	6.834	12.2472	-1.95		-0.8644	5.34	9.62593	-16.2106	0.01	3.76699
1667	15.761	14.614	-2.812	-0.389303	16.484	9.188	-0.97	9.67	-0.022	-2.80958	7.5955	6.916	12.7033	-1.04		-2.1245	5.16	9.40815	-20.1106	-0.03	2.51384
1666	15.539	14.283	-1.971	-0.301981	16.237	9.681	0.78	10.46	1.075	-2.30969	7.9147	6.681	13.8868	-0.96		-0.8646	5.46	9.52982	-14.9631	-0.09	2.68253
1665	15.28	13.79	-0.663	-0.720945	15.936	10.117	1.12	11.92	0.588	-1.02102	7.7538	6.469	12.2408	-1.55		-1.0074	5.38	9.78622	-15.0407	-0.01	2.82713
1664	15.756	14.191	-0.65	-0.267574	15.813	10.007	0.79	11.52	0.425	-1.67749	8.5015	6.28	13.3401	-1.72		-0.9025	5.38	8.53982	-13.7557	-0.01	1.91136
1663	15.553	14.301	-0.315	-0.615608	15.714	9.845	0.06	10.14	-1.079	-1.98042	8.5443	6.246	12.6719	-0.33		-1.1412	5.58	9.07227	-13.9418	-0.02	2.12825
1662	15.275	14.085	-1.253	-0.34205	15.339	9.748	-0.2	10.87	-0.186	-2.35023	8.4664	6.547	12.8331	-0.5		-1.493	5.71	7.61627	-15.5104	-0.08	2.03186
1661	15.102	13.717	-0.873	-0.082072	15.878	9.826	-0.16	10.89	0.668	-2.60233	9.3742	6.487	12.5786	0.24		-1.1985	5.36	8.29293	-12.0396	-0.05	1.95956
1660	14.873	14.052	-1.02	-0.30296	15.467	10.547	-0.08	11.81	-1.153	-0.53721	7.545	6.501	13.4529	-1.27		-0.7826	5.48	8.38733	-12.8614	-0.06	1.98366
1659	15.016	14.609	0.911	-0.2821	14.816	10.015	-0.48	11.15	-0.642	-1.19947	8.8227	6.462	13.0246	0.38		-1.1079	5.36	9.15259	-14.0394	0.09	2.61023
1658	15.004	14.618	1.631	-0.20008	15.281	10.834	0.2	12.05	-0.781	-1.69058	8.4759	6.524	11.1182	-0.85		-0.7133	5.57	8.7656	-14.5598	-0.04	1.86317
1657	15.158	14.775	-0.112	-0.727967	15.862	10.213	0.26	10.96	-0.742	-0.942513	8.0242	7.042	11.2374	-1.3		-0.2001	5.85	8.91163	-18.6789	-0.09	1.71857
1656	16.001	14.885	1.451	-0.441855	14.845	10.061	0	11.01	-0.444	-1.10326	9.0009	6.941	12.5512	0.55		-0.3585	5.6	8.96274	-16.3433	-0.11	2.12825
1655	15.385	15.106	-3.06	-0.471114	15.742	10.659	1.1	11.58	-0.642	-0.810345	7.5082	6.72	11.6527	-1.51		-0.5443	5.48	7.81754	-15.3358	-0.15	3.04402
1654	15.224	15.368	0.505	-0.305644	15.553	9.644	-0.2	10.48	-1.61	-2.23317	7.8177	6.834	11.8669	-0.54		-0.5749	5.15	11.1817	-14.3823	-0.16	3.01992
1653	15.116	14.913	0.267	-0.535922	15.574	9.875	-0.24	10.12	-0.771	-1.70037	8.2599	6.907	12.9526	-1.55		-0.7634	5.54	11.455	-18.3011	-0.07	2.00776
1652	14.602	14.973	-1.933	-0.492918	13.881	9.811	0.81	10.55	-1.253	-1.28138	8.7119	7.099	11.7985	0.54		-0.5894	5.14	9.47435	-17.9325	-0.18	1.86317
1651	14.31	13.781	-2.513	-0.676103	15.104	9.701	0.04	10.74	-1.019	-0.849208	8.8634	7.673	11.3282	-0.86		-0.823	5.32	11.034	-17.3682	-0.17	2.08006
1650	14.584	14.287	0.883	-0.451691	15.1	9.428	0.13	10.58	-1.178	-0.552912	8.3287	7.165	11.7138	-0.98		-1.756	5.54	10.0812	-10.5381	-0.2	2.22465
1649	14.381	13.97	-1.704	-0.753464	15.808	9.07	0.57	10.88	-0.449	-1.23241	8.3478	6.93	11.41	-0.81		-1.3292	5.67	10.832	-11.2289	-0.17	2.85122
1648	14.5	14.908	1.234	-0.314664	16.282	9.055	-0.01	11.01	-0.732	-0.582733	7.9999	7.019	9.89763	-0.45		-1.4764	5.61	11.1398	-11.1956	-0.1	2.12825
1647	14.266	14.48	-1.247	-0.234161	15.837	9.062	-0.76	9.09	-1.332	-1.95914	8.7224	7.16	10.8902	-1.23		-0.8545	5.13	10.5866	-13.2293	-0.11	3.5019
1646	15.03	14.278	0.033	-0.449183	15.401	8.583	-0.14	9.5	0.152	-2.40209	7.6918	6.777	9.60188	-0.04		-0.2561	5.38	10.0581	-17.1027	-0.11	3.81519
1645	15.163	14.835	-1.256	-0.383102	16.327	8.129	-0.25	9.39	0.052	-2.86329	7.7244	6.959	12.0372	-0.3		-1.1467	5.43	9.211	-11.5	0	3.16451
1644	15.558	15.787	-4.921	-0.457625	16.134	8.563	0.11	9.01	-0.211	-2.21735	6.7928	6.524	10.768	-0.24		-0.8405	5.43	10.4004	-12.8246	-0.07	2.97172
1643	15.168	15.442	-1.79	-0.543653	14.305	9.311	-0.56	9.25	0.281	-2.67921	7.1893	6.85	13.1388	-1.61		-0.9494	5.25	10.2092	-16.033	0.05	4.39356
1642	15.359	14.904	-3.756	-0.531339	14.655	8.076	-0.8	9.74	-0.479	-2.73859	7.1479	6.971	12.9618	-0.12		-1.0346	5.41	10.6951	-13.2617	*	2.36924
1641	15.562	14.959	-2.62	-0.846668	15.718	8.477	-0.86	8.82	-0.305	-1.80901	5.2847	6.839	11.926	-2.27		-0.5593	5.44	10.1429	-15.0641	-0.04	2.75483
1640	15.2	14.853	-2.095	-0.185235	16.974	10.074	0.62	11.68	0.147	-2.10054	8.1582	7.099	13.4876	-0.4		-1.578	5.35	12.2668	-20.1197	-0.08	2.46564
1639	14.969	14.738	-1.365	-0.409799	15.327	9.537	-0.34	11.28	-1.749	-2.71079	8.7932	6.412	12.8537	-0.44		-2.13	5.62	10.8481	-19.0305	-0.07	1.98366
1638	15.413	16.243	0.078	-0.441312	15.767	9.484	-0.47	9.75	0.598	-3.45114	8.5226	7.174	12.5717	0.23		-0.9772	5.63	10.983	-14.983	-0.08	2.46564
1637	14.957	15.382	2.861	-0.0248939	15.697	9.692	-0.1	10.91	0.162	-3.43477	7.7938	7.19	12.4599	-1.78		-0.9753	5.47	10.832	-17.5988	-0.07	2.94762
1636	14.719	14.227	1.372	-0.0049351	16.97	9.336	-0.42	11.48	-0.255	-2.00261	9.3551	7.343	11.4909	-0.09		-1.7499	5.6	11.0054	-21.2599	-0.08	2.41744
1635	14.465	14.085	-1.351	-0.154464	15.981	9.179	-0.52	9.93	-0.32	-2.51357	8.2329	7.764	12.8008	-1.02		-1.2894	5.27	11.3423	-22.5663	-0.12	3.16451
1634	14.75	14.411	-4.236	-0.811023	16.282	9.563	0.33	11.39	-1.089	-1.76405	8.8664	7.591	12.6394	-0.07		-1.6663	5.47	10.004	-16.9807	-0.16	3.3573
1633	15.247	15.695	-0.681	-0.732859	15.446	9.123	-0.97	9.29	-1.675	-2.12696	7.5658	7.085	11.9868	-0.15		-1.7092	5.49	10.1352	-19.9543	-0.13	2.34515
1632	14.892	14.586	-2.617	-0.431787	16.331	9.749	-0.77	10.24	-1.496	-1.75413	8.5837	7.737	11.9602	-0.43		-1.0518	5.44	11.0125	-16.0563	-0.11	2.87532
1631	15.016	14.048	-4.197	-0.401915	16.171	9.533	0.41	10.8	-0.93	-1.56862	8.272	6.998	12.4374	-1.85		-0.4687	5.43	10.2376	-18.7795	0.07	2.87532
1630	15.294	14.66	-1.742	-0.51469	16.084	9.307	-0.1	10.2	-1.163	-1.06801	7.9019	7.336	12.9018	-1.03		-0.6997	5.98	10.7512	-18.0038	0.02	4.34536
1629	15.058	13.767	-0.98	-0.233107	16.191	10.515	0.91	11.79	-0.632	-0.436071	7.0196	6.829	14.2946	-1.51		-0.4683	5.81	10.9007	-15.9086	0.03	3.3573
1628	14.836	13.855	-1.805	-0.463666	14.865	9.669	0.01	11.29	-2.369	-0.841322	7.0351	7.087	12.414	-0.6		-1.2876	5.92	10.4659	-12.5378	-0.09	3.4055
1627	14.324	13.878	0.972	-0.744982	15.384	9.717	-0.1	10.98	-0.151	-1.13546	6.8955	6.996	12.812	-0.31		-1.1098	5.54	10.4801	-13.9234	-0.06	3.4778
1626	14.801	13.114	-0.774	-0.729316	16.669	9.904	0.03	11.75	-1.069	-0.449305	6.6567	6.69	14.1699	-1.26		-0.995	5.42	11.1608	-14.6366	0.09	2.58614
1625	14.567	14.283	-1.129	-0.679888	16.784	9.248	0.18	10.24	-0.359	-0.793218	7.2445	6.567	13.4648	-1.08		-0.8289	5.53	10.5795	-11.9135	0.03	2.51384
1624	14.623	13.505	-0.744	-0.34224	15.817	9.187	-0.55	10.72	-0.523	-0.66909	7.4509	6.36	13.0261	-1.27		-0.4605	5.09	9.06497	-15.1978	-0.03	2.51384
1623	14.824	13.914	-1.438	-0.559253	14.919	9.085	-0.45	10.09	-0.667	-0.595639	8.2283	6.528	12.2857	-0.15		-1.0114	5.38	10.5156	-13.765	-0.06	2.12825
1622	15.02	14.609	-2.754	-0.436969	15.751	9.108	0.32	10.64	-0.697	-0.573432	7.5397	7.069	14.1599	0.05		-0.4575	5.68	10.3772	-14.1799	-0.07	2.36924
1621	14.759	14.029	-0.593	-0.658242	16.496	9.297	-0.32	10.76	-0.121	-1.35578	6.6729	7.133	13.322	0.47		-1.0591	5.64	11.0555	-11.5928	-0.09	3.526
1620	14.579	14.02	1.409	-0.861303	15.969	8.425	-0.64	9.43	-0.483	-1.37571	8.3765	6.608	13.0105	-0.91		-0.2201	5.83	11.5121	-11.668	-0.15	2.70663
1619	15.329	14.816	1.876	-0.480136	16.455	8.736	-0.49	10.64	-0.206	-1.61941	8.6109	6.962	10.1746	-0.43		-0.4156	5.26	9.96384	-13.4312	-0.12	4.94784
1618	15.016	14.715	0.479	-0.543459	16.274	8.926	-0.05	9.71	-0.781	-0.79151	7.7195	6.741	13.449	-0.31		-0.3391	5.7	9.24751	-13.0397	-0.05	2.70663
1617	14.523	13.744	-4.458	-0.541124	16.801	8.941	0.17	10.35	-0.603	-1.74126	8.631	7.281	12.2801	-0.11		-0.4355	5.54	11.8571	-13.3262	0.01	3.64649
1616	15.02	14.356	-0.672	-0.483562	16.039	8.398	-0.93	9.4	0.157	-1.97926	7.8431	7.153	14.0254	-0.07		-0.252	5.6	11.681	-14.2584	0.04	2.70663
1615	14.539	13.303	-3.151	-0.428049	16.023	8.543	-1.13	9.34	0.018	-0.474358	7.5254	6.674	13.2958	-1.26		-0.7761	5.28	10.5945	-11.8934	-0.06	2.63433
1614	15.464	14.568	-0.812	-0.182783	16.364	8.856	-1.53	9.16	-0.146	-0.796634	9.0536	6.934	11.9511	0.5		-1.1813	5.39	11.8264	-17.6131	-0.08	2.56204
1613	14.63	14.283	-1.663	-0.373832	16.36	9.002	-0.29	10.25	-0.583	0.147419	8.0976	6.67	11.5053	-1.16		-0.8678	5.5	11.1049	-17.109	-0.07	3.526
1612	14.887	14.536	1.093	-0.570301	16.525	8.852	-0.91	10.12	-1.421	-0.139555	7.2957	7.222	11.7411	-0.94		-0.4169	5.58	12.1248	-17.5719	-0.14	2.87532
1611	15.275	15.833	1.201	-0.605787	15.561	9.119	-0.49	10.1	-0.796	-1.32959	8.1917	7.085	10.0351	-1.12		-0.5108	5.68	11.2515	-16.6378	-0.1	4.77914
1610	14.852	14.457	-1.524	-0.333625	15.833	8.667	-0.42	9.71	-1.282	0.171333	7.6806	7.365	11.1036	0.02		-0.7343	5.72	10.3541	-12.2928	0	3.59829
1609	14.757	15.023	-4.026	-0.472795	16.06	8.269	-1.1	9.12	-2.116	-0.118488	7.7509	7.201	11.6969	-0.21		-0.3268	5.43	11.2027	-14.9841	-0.1	2.12825
1608	13.941	15.152	-1.07	-0.617208	16.035	8.575	-1.09	9.31	-1.898	-0.156068	8.3559	7.169	11.0023	-0.01		-1.2624	5.23	10.6182	-16.7284	-0.07	4.03208
1607	13.948	14.278	0.874	-0.208099	16.035	8.639	-0.69	8.82	-2.166	-0.480052	8.2954	6.957	11.2849	-0.93		-0.1421	5.27	11.2027	-15.7362	-0.1	2.24875
1606	14.565	15.304	-0.353	-0.460089	15.215	9.01	-0.82	9.67	-2.255	-0.827382	7.7083	6.613	10.1582	-1.38		-0.9401	5.42	11.034	-17.0146	-0.11	4.10437
1605	14.584	13.859	-0.556	-0.186318	15.631	8.316	-0.8	9.07	-1.804	-0.792649	8.562	6.353	9.87037	-0.69		-0.9278	4.96	10.3086	-18.3006	-0.09	4.65865
1604	14.92	14.628	-0.84	-0.401705	15.372	8.728	-1.45	9.62	-1.63	-1.40759	7.434	6.44	10.416	-0.06		-0.836	5.55	10.4375	-15.0407	-0.07	2.58614
1603	15.495	13.979	-0.463	-0.28937	15.195	9.112	-1.43	10.28	-2.196	-2.51563	9.889	6.483	12.1888	-0.43		-1.1916	5.19	9.87675	-18.1556	-0.07	2.92352
1602	15.21	13.901	-2.699	-0.636381	15.85	8.59	-1.48	9.85	-2.826	-1.72304	8.1425	6.483	9.00629	-0.83		-1.7878	4.98	9.40815	-15.6592	-0.06	2.63433
1601	15.081	13.96	-0.704	-0.621593	13.724	8.087	-1.69	8.16	-3.074	-0.260836	4.7532	6.494	10.6544	-2.52		-0.5203	5.47	8.13865	-18.978	-0.09	2.24875
1600	15.672	14.733	0.775	-0.431074	15.784	9.672	-1.18	10.7	-2.404	-0.663966	9.2113	6.647	10.9268	-0.53		-1.281	5.17	9.94756	-19.6191	-0.13	2.12825
1599	15.483	14.126	1.094	-0.319866	15.549	9.923	-0.84	11.26	-2.34	-0.340551	7.8692	6.722	12.8337	-0.22		-0.3882	5.4	9.24021	-17.1543	-0.19	2.00776
1598	15.165	14.071	0.863	-0.186078	15.009	9.141	-0.77	11.26	-2.493	0.0642875	8.7436	6.766	10.6739	-0.91		-0.5255	5.21	8.95544	-14.1527	-0.15	2.61023
1597	14.514	13.855	-1.432	0.0845784	15.401	9.496	-1.17	10.24	-2.27	0.629125	8.8856	7.454	10.7762	-1.39		-0.8093	5.38	9.55385	-15.4259	-0.09	1.86317
1596	14.869	14.333	-1.612	-0.105975	15.652	9.368	-1.05	10.22	-2.94	1.15866	6.4684	6.816	12.457	-1.8		-0.6355	5.26	9.96384	-20.7155	-0.03	2.17645
1595	15.235	14.563	0.302	-0.114225	14.894	9.352	-1.58	10.66	-1.739	0.646776	8.4867	7.197	10.4306	0.24		-0.6596	5.27	10.0503	-14.1074	0.09	1.71857
1594	15.151	14.255	-0.237	-0.341366	14.836	9.527	-1.01	11.01	-1.813	0.638235	8.1991	7.493	13.1531	-0.86		-0.269	5.19	8.81671	-13.5161	-0.04	1.81497
1593	15.123	14.246	-2.962	-0.577889	14.297	8.838	-1.29	10.34	-1.739	-0.604749	8.6612	6.962	11.827	0		-0.9099	4.9	9.07957	-15.675	-0.04	1.76677
1592	14.974	14.034	-0.688	-0.382975	14.985	9.108	-0.91	10.35	-1.501	-0.767595	8.2153	7.108	14.4559	-1.15		-0.2828	5.02	10.6807	-14.3928	0.02	2.03186
1591	15.1	13.487	-0.247	-0.141439	14.845	8.514	-1.35	10.14	-1.724	-0.458415	8.2612	7.322	13.282	-0.14		-1.0514	4.87	10.7512	-17.0705	-0.08	2.17645
1590	15.07	13.942	0.731	-0.850955	14.103	8.388	-0.7	9.92	-0.871	-0.207882	8.5401	6.875	11.8754	-0.44		-0.7069	5.27	9.90693	-17.7388	0.03	2.22465
1589	14.757	14.043	-3.68	-0.408287	13.267	8.886	-0.42	9.89	-1.312	1.06414	8.0102	6.551	12.0166	-1.31		-0.9639	5.09	7.77273	-14.5899	-0.07	2.03186
1588	14.936	14.26	0.672	-0.352812	14.861	8.631	-0.24	10.44	-2.374	-0.0387726	7.7348	6.674	11.1277	0.17		-0.7198	4.93	10.8158	-16.8802	-0.01	2.22465
1587	14.992	14.72	0.656	-0.257701	15.137	8.924	-1.19	9.62	-0.657	-0.127598	6.7349	6.585	12.4702	-1.62		-0.893	4.94	10.5866	-15.5165	0.11	1.98366
1586	15.018	14.54	-0.21	-0.226844	15.487	9.257	-0.02	11.42	-0.091	-0.505675	8.1499	6.941	12.8716	0.17		-0.7267	5.43	10.3157	-13.9013	-0.09	2.39334
1585	15.446	14.191	-0.485	-0.306361	14.408	9.287	0.16	11.14	-0.349	-1.56588	7.5495	6.38	11.649	-1.02		-0.9007	5.44	9.39354	-15.5278	-0.01	2.29695
1584	15.446	14.048	0.944	-0.383489	14.882	9.098	0.06	10.51	-0.399	-0.944677	8.3446	7.003	10.5601	-0.61		-0.4313	5.53	10.0426	-13.9896	0.05	2.48974
1583	15.142	14.448	1.487	0.201127	16.657	9.114	-0.3	11.89	-0.027	-1.26126	8.0285	7.349	11.6415	-0.43		-1.036	5.3	10.4872	-13.9602	0.19	3.28501
1582	15.516	15.115	-0.388	0.214961	16.101	9.177	-0.15	11.48	-1.213	-1.06823	7.8593	7.231	10.895	-0.05		-0.7579	5.45	10.2447	-18.142	0.19	3.18861
1581	15.263	15.157	-2.751	-0.115271	15.619	8.905	-0.96	10.49	-1.64	-0.804037	7.3347	6.861	12.2358	-1.52		-0.7054	5.5	9.13798	-14.8731	-0.2	3.23681
1580	14.906	15.152	-1.883	-0.0930489	17.682	8.628	-1.13	9.89	-1.357	-0.223825	8.5191	6.62	12.0729	0.31		-0.2337	5.17	9.10878	-15.1993	-0.21	2.03186
1579	14.493	15.575	-2.538	0.162219	16.105	9.296	-1.39	11.09	-1.58	-0.412294	7.9614	6.85	11.9018	-1.16		-1.5866	5.38	10.1737	-11.978	-0.2	3.18861
1578	14.418	14.913	-2.268	0.00242547	16.126	8.856	-0.5	10.2	-0.449	-0.0177051	7.7689	7.028	12.1233	0.51		0.0234	5.48	10.9248	-13.353	-0.15	3.30911
1577	14.418	15.12	0.955	0.348073	15.635	9.248	-0.86	10.85	-1.005	0.460585	7.8327	6.665	12.7712	-0.41		-0.5258	5.59	9.33513	-10.2427	-0.12	2.56204
1576	14.829	15.488	-5.676	0.259431	16.995	9.765	-0.61	11.09	-0.374	0.413325	9.3176	6.654	11.7724	0.04		-0.9169	5.74	10.5085	-14.6126	-0.16	3.83928
1575	14.455	14.908	0.457	0.0660466	15.549	9.777	0.5	10.9	0.683	0.781722	8.8175	6.871	14.0097	-0.04		0.2837	5.56	10.3157	-14.6013	-0.2	2.24875
1574	14.918	14.853	-1.48	-0.064792	17.456	8.706	-0.53	10.21	0.077	-0.0285236	8.3402	6.665	13.7949	0.01		-1.0682	5.03	10.9007	-14.2818	-0.17	3.83928
1573	14.981	16.206	-1.275	-0.0584026	16.031	9.836	-0.47	10.64	0.464	-0.624108	8.7132	6.734	12.6384	-0.71		-1.4637	5.6	10.4872	-17.5598	-0.03	2.61023
1572	14.822	15.152	0.585	-0.388483	15.936	9.624	-0.1	10.89	0.837	-1.08759	8.4128	6.426	11.6764	-0.09		-0.6442	5.45	10.3309	-18.0967	0	2.27285
1571	15.385	15.143	-2.292	0.144464	16.237	9.513	0.09	10.52	-0.255	-0.373576	8.2476	6.554	11.6069	-1.39		0.0254	5.35	10.0503	-18.287	0.09	2.39334
1570	14.88	14.968	-2.499	-0.303221	16.261	10.203	0.31	11.32	0.489	-0.909374	9.1021	6.752	12.3162	-1.15		-0.5367	5.66	9.93942	-14.4699	0.22	4.34536
1569	14.906	13.979	-4.027	-0.172912	15.763	10.17	-0.55	12.25	0.549	-0.764748	8.4389	6.574	12.5234	-0.64		-0.9705	5.71	9.38624	-8.4462	0	3.01992
1568	15.217	13.574	-0.299	0.369103	16.212	9.845	-0.25	10.59	0.846	-0.432792	8.9171	6.652	11.8803	-1.5		-0.3828	5.71	10.3157	-8.2333	-0.14	2.92352
1567	15.191	14.848	1.697	-0.260048	16.142	10.113	-0.45	10.34	0.052	-2.092	8.542	6.652	11.9413	0.05		-0.5774	5.5	10.8077	-13.532	-0.06	1.88726
1566	15.432	15.483	0.998	0.100278	15.289	10.645	-0.4	11.75	0.425	-2.05044	8.0851	7.231	11.7517	-0.85		-0.4346	5.42	10.5156	-8.4644	-0.06	1.69447
1565	14.75	13.91	0.135	-0.360322	16.562	11.092	0.08	11.8	0.191	-0.823965	8.6684	7.577	12.6572	0.61		-0.5184	5.35	10.4446	-13.1816	0.05	2.41744
1564	14.808	13.62	-0.859	-0.157702	15.565	11.054	1.04	11.94	0.211	-1.00219	8.6534	7.238	11.7894	0.36		-0.0565	5.26	10.385	-14.2705	0.05	2.75483
1563	14.595	14.802	-1.704	-0.198916	15.833	10.576	-0.04	11.5	0.281	-1.26809	8.2081	7.037	12.5198	-1.3		-0.0545	5.49	10.84	-11.5815	0.06	2.17645
1562	14.637	14.352	-1.355	0.0167069	15.549	11.108	0.29	11.64	1.427	-1.24873	8.8556	7.313	12.7515	-0.27		-0.4483	5.58	10.2092	-9.0669	-0.13	2.32105
1561	14.845	15.056	0.9	-0.173536	16.78	10.103	0.69	11.29	1.71	-1.50951	8.7615	7.372	12.9978	-1.2		0.3178	5.1	10.9664	-12.4265	-0.09	2.65843
1560	14.668	14.531	-6.36	0.0618139	16.336	10.617	0.38	11.32	0.33	-1.64958	8.3393	7.231	12.0417	-0.67		-0.0943	5.59	10.84	-17.399	-0.12	2.03186
1559	14.81	14.614	0.867	-0.188866	15.067	10.273	0.27	10.87	0.315	-2.10111	7.799	7.771	10.5302	-1.03		0.4499	5.71	10.385	-16.1825	0.03	3.4778
1558	14.887	15.129	-1.409	0.0948024	15.475	10.239	0.77	11.66	0.261	-0.830229	8.5388	7.874	12.0668	-0.58		0.5706	5.55	10.832	-18.355	-0.19	3.11631
1557	14.684	14.494	-0.551	0.264262	15.306	9.81	-0.07	10.31	0.122	-1.42126	7.3088	6.802	11.1931	0.03		0.2933	5.69	11.2655	-16.3365	0.09	2.15235
1556	14.703	14.503	-0.436	0.0760558	15.537	10.165	0.34	10.56	0.549	-2.691	7.8493	7.386	10.9241	-0.96		0.5218	5.7	9.99632	-11.176	-0.12	3.5742
1555	14.745	14.048	-3.315	0.118309	14.915	10.218	0.01	10.59	0.315	-1.07279	8.4045	7.242	12.2244	-0.04		-0.8269	5.76	10.385	-14.7689	-0.14	2.82713
1554	15.364	14.195	0.162	0.0458038	15.059	9.862	-0.45	10.49	-0.434	-2.014	8.6438	7.032	11.3179	-1.22		-0.0103	5.83	9.40815	-15.5165	-0.06	2.77893
1553	15.228	15.286	-0.661	-0.273722	15.252	10.754	0.13	11.18	0.807	-1.13087	7.7848	6.957	11.8791	-1.65		0.2379	5.98	9.69569	-10.5568	-0.1	3.06812
1552	15.354	14.871	-0.848	0.322662	16.13	10.096	-0.69	11.01	0.549	-2.51449	8.3769	6.679	10.9668	-0.35		-0.1847	6.25	11.1328	-14.7326	-0.11	1.95956
1551	15.233	15.102	-0.117	0.402619	16.912	10.662	-0.09	11.35	0.206	-2.31122	7.9821	7.411	11.6513	-0.84		0.1283	5.91	10.7512	-13.5003	-0.1	3.4055
1550	15.207	15.327	-2.129	0.262976	16.224	10.244	-0.23	10.53	-0.622	-0.637774	7.7878	7.092	10.9687	-0.14		-0.527	5.99	10.5582	-7.8051	-0.11	2.87532
1549	15.611	14.605	-0.49	0.469393	16.541	10.314	-0.11	10.17	-0.429	-0.512507	7.399	6.67	11.1939	-0.63		-0.6747	5.48	10.0349	-13.9398	0.04	2.58614
1548	15.959	15.686	-0.476	0.00915074	17.205	10.766	-0.28	10.97	0.132	-0.629802	8.6591	7.094	11.9162	-0.18		0.0033	5.72	9.78622	-12.755	-0.06	5.18883
1547	15.871	15.727	0.259	0.461995	16.566	10.185	-0.06	11.26	-0.498	-0.0894486	7.7397	7.315	11.8224	-0.67		0.1511	5.99	9.99632	-13.097	0.05	4.36946
1546	15.261	15.226	-0.437	0.429111	15.149	10.493	-0.17	11.24	-0.816	-0.51023	7.4899	7.315	11.1879	-1.15		-0.0954	6.31	8.45994	-12.0731	0.01	2.29695
1545	14.913	14.715	-1.206	0.696407	15.998	9.94	-0.02	11.86	-1.144	-0.35991	7.9652	7.349	13.0107	0.21		0.5917	5.9	10.0426	-11.9553	-0.01	2.22465
1544	14.46	14.531	-1.556	0.0335596	16.579	9.945	-0.54	10.46	-0.995	0.255603	7.1117	7.165	12.9418	-1.68		-0.8125	5.88	10.8158	-10.9699	0.01	2.29695
1543	14.71	14.103	-1.53	0.425943	16.636	9.961	-0.06	10.61	-1.223	-1.13713	7.5543	6.665	12.4978	-0.34		-0.1416	5.81	10.2447	-14.744	-0.04	3.59829
1542	15.7	13.983	-1.696	0.314141	15.462	10.177	-0.28	10.54	-1.392	-1.15934	7.8772	6.389	12.2776	-1.69		-0.0683	6.48	9.56186	-16.6627	-0.04	2.22465
1541	14.782	14.296	0.736	0.470055	16.743	9.782	0.31	11.1	-0.826	-0.216423	7.1954	7.076	12.879	-0.53		0.5878	6.17	10.3541	-9.4271	-0.03	3.91158
1540	14.535	14.301	1.212	0.206726	16.677	9.907	0.38	10.98	0.216	-1.24816	7.0565	6.973	14.2567	-1.21		1.2251	6.3	9.99632	-13.0744	-0.13	3.3573
1539	14.915	14.154	0.444	-0.199799	16.488	10.704	0.77	11.47	-0.25	-0.647453	7.0219	7.231	13.6888	-1.21		0.6344	5.76	10.3232	-12.7867	-0.02	1.81497
1538	14.92	14.011	-0.297	0.328962	16.636	10.405	-0.12	11.45	-1.273	-0.471511	7.2071	7.16	11.9066	-0.92		0.589	5.78	10.5156	-13.1831	-0.01	2.29695
1537	15.368	14.416	-0.386	-0.0680098	15.994	9.774	-0.01	11.67	-1.148	0.322792	7.4094	7.425	12.5375	-0.7		0.5184	6.02	8.82401	-13.3349	0.03	2.70663
1536	15.14	13.629	0.309	0.280972	15.887	9.764	-0.43	10.89	-1.665	-0.0199827	6.4707	7.238	13.5874	-1.26		0.5476	5.97	10.1429	-15.5323	0.11	2.29695
1535	14.985	13.983	-3.002	0.333514	16.628	10.743	0.37	11.41	-0.995	-1.65699	8.4029	7.324	12.3206	-1.14		-0.2742	5.8	11.2236	-15.0317	-0.13	2.05596
1534	15.193	13.947	-2.867	0.355761	15.277	10.115	0.13	11.55	-0.965	-0.239199	7.913	6.72	12.2846	-1.14		-0.1486	6.02	9.83903	-14.7644	-0.08	2.77893
1533	15.681	14.365	-1.135	0.212315	15.046	10.255	0.63	12.08	-1.382	-0.0410502	7.8518	6.658	13.2696	0.59		-0.6882	5.59	8.47447	-14.0304	-0.12	2.05596
1532	15.506	13.813	-0.453	0.161864	15.907	10.053	0.07	11.98	-0.533	-2.07037	8.3552	6.49	13.0621	-0.61		0.5232	6.19	10.2802	-8.8404	-0.04	2.87532
1531	15.128	14.513	-2.44	-0.136462	16.616	9.468	0.38	10.95	-0.692	-0.480052	9.2479	6.907	12.379	0.07		0.2865	5.75	11.2725	-11.0265	-0.17	2.17645
1530	14.745	14.029	-3.012	0.116036	15.726	9.347	-0.3	10.45	-0.955	-0.743111	8.738	7.283	11.8209	-0.4		-0.1214	6.27	10.8481	-11.6495	-0.12	2.41744
1529	14.948	14.163	-6.024	0.0768936	16.731	9.16	-0.55	10.51	-0.32	-0.24774	8.1152	7.103	12.4849	-0.26		-0.647	6.25	11.5414	-13.0155	-0.08	3.23681
1528	14.813	14.862	-3.159	0.0937248	16.167	9.689	0.11	10.49	-0.672	-0.964036	8.2315	6.572	11.7357	0.7		-0.734	5.87	10.5945	-15.5006	-0.11	2.41744
1527	14.514	13.634	-1.668	-0.159815	16.426	9.275	-0.48	10.16	-0.27	-0.0245378	9.3511	6.697	12.4969	-0.78		-0.0653	6.34	11.1328	-12.5715	-0.15	2.22465
1526	14.794	13.247	-3.324	0.0546329	15.273	10.138	0.29	10.67	-0.052	0.129198	7.8018	7.224	12.1815	-0.86		0.7557	5.87	10.004	-14.6284	-0.08	3.26091
1525	15.191	13.905	-1.298	0.567447	16.014	9.795	0.02	10.95	-0.29	-0.865531	8.5132	6.959	12.8668	-1.02		0.2096	5.68	11.3144	-13.3806	0.01	2.61023
1524	14.866	14.103	-3.93	0.286628	15.051	9.506	-0.68	9.65	-1.019	-1.33471	7.6915	7.286	13.4036	-1.25		-0.1216	6.22	10.3086	-11.3255	-0.03	3.09221
1523	14.635	13.855	-2.148	0.0999784	16.175	10.72	0.12	10.91	-1.198	-0.773289	7.4158	7.568	12.0106	-1.18		-0.3709	6.18	10.8714	-9.7398	-0.06	2.48974
1522	14.794	13.845	0.37	0.353729	15.808	9.895	-0.23	10.66	-0.93	-0.945246	8.4651	6.882	11.6743	-1.72		-0.0062	5.65	10.8934	-9.0398	0.05	2.73073
1521	14.481	13.786	-0.825	0.496917	16.187	9.868	0.49	11.03	-0.082	-0.464678	7.5023	6.809	11.5644	-0.7		0.1657	6.44	11.3353	-12.6009	-0.04	1.98366
1520	14.85	13.321	-0.383	-0.22468	17.2	10.012	-0.6	10.53	-0.012	-1.24645	7.4492	7.053	12.3821	-1.27		0.1783	5.58	11.1189	-12.6394	-0.01	2.29695
1519	14.238	13.648	-0.568	-0.271862	17.39	10.401	0.76	10.66	0.256	-2.38296	7.9878	7.062	11.9873	-0.45		0.277	5.86	11.3772	-10.6935	-0.19	3.69469
1518	14.703	13.56	0.744	0.171124	17.571	10.589	0.37	10.97	-0.091	-1.79421	8.0781	6.768	11.0894	-0.82		-0.3265	5.79	11.5193	-11.7333	-0.07	2.34515
1517	15.149	14.131	0.11	0.197326	16.892	10.591	0.04	10.64	-0.345	-0.879196	9.2923	6.98	13.0106	-0.49		0.16	5.48	10.886	-13.6815	-0.09	2.99582
1516	14.841	14.094	-1.008	-0.0837739	17.439	9.465	-0.44	9.23	0.023	-0.308665	8.178	6.522	12.1943	-1.36		0.1735	5.67	11.1259	-11.4705	-0.2	2.44154
1515	15.294	13.464	-1.291	0.302117	16.307	10.495	0.99	11.11	-0.563	-0.771581	8.4621	6.8	11.9611	-0.2		-0.0151	5.67	10.3157	-11.8602	-0.11	2.12825
1514	15.006	14.425	0.057	0.0594832	16.784	9.962	0.53	9.59	0.162	-2.07777	7.1711	7.418	12.7233	-0.98		0.0336	5.71	10.5724	-14.8595	-0.12	2.34515
1513	15.126	14.559	0.54	-0.41265	15.359	10.465	0.42	11.02	0.459	-1.1787	9.0595	6.994	12.1834	-0.32		0.4275	5	9.77868	-11.3391	-0.08	2.73073
1512	15.411	15.534	0.17	-0.0198575	15.656	10.762	0.49	11.16	0.554	-0.318344	9.8451	7.365	12.8939	-1.09		0.2121	5.71	10.5369	-13.267	-0.03	2.68253
1511	14.577	15.198	0.489	-0.20444	15.771	10.338	0.78	11.2	-0.598	-1.19521	9.1566	7.156	13.5633	-0.52		0.0128	6.13	11.1398	-17.066	-0.12	3.23681
1510	15.077	14.729	1.52	-0.37167	14.828	10.055	-0.06	10.09	0.598	-1.8967	9.5913	6.611	13.6071	0.11		0.5564	6.73	10.9498	-13.9081	-0.04	2.53794
1509	15.408	15.626	-2.223	-0.361006	15.479	10.143	0.44	10.36	0.147	-1.2624	9.1913	6.312	11.9394	-1.02		0.7945	6.29	11.0125	-13.5864	0.06	2.85122
1508	15.305	14.352	-1.194	0.397563	15.907	10.362	0.65	11.3	0.315	-2.35563	9.5685	6.574	12.8006	-0.1		0.6955	6.11	10.5866	-14.2116	-0.04	3.01992
1507	14.873	15.479	2.254	0.0203122	17.365	10.399	-0.18	10.37	0.306	-3.55193	9.0669	6.809	11.4586	-0.73		0.9063	5.6	10.6951	-12.2634	0.01	2.75483
1506	14.988	15.341	1.4	-0.0704476	16.406	10.491	0.66	10.86	-0.34	-2.63919	8.7688	6.809	12.967	-0.42		0.9544	5.62	10.6103	-14.4925	0.02	2.53794
1505	15.56	15.074	0.989	-0.661621	15.252	10.545	0.91	11.38	-0.206	-2.78609	7.6744	6.485	12.8314	-1		0.5863	5.61	10.0426	-16.7216	0	2.27285
1504	15.338	15.368	0.044	-0.258373	16.369	10.714	0.54	10.55	0.023	-1.95535	7.9795	6.964	13.3926	-1		0.491	5.15	10.9007	-15.9605	-0.05	3.4055
1503	14.957	15.023	-0.905	0.0675589	15.944	9.741	0.67	10.47	0.311	-2.03279	7.5815	6.741	12.3298	-1.22		0.3697	5.33	10.7916	-15.589	0.03	4.32126
1502	14.514	16.302	-2.673	-0.340279	16.883	10.411	0.88	11.22	0.43	-1.12176	8.1633	6.647	12.9176	0.11		0.876	5.82	10.3541	-14.3951	-0.03	3.83928
1501	14.824	15.723	1.181	-0.0797489	16.327	11.056	0.06	11.21	0.499	-1.01642	8.8587	6.72	12.6825	-0.94		0.5751	5.99	10.1352	-12.653	0.03	3.79109
1500	14.705	15.718	-1.215	-0.0346253	17.126	10.852	0.01	11.15	0.023	-0.493148	8.0992	7.153	12.1055	-1.67		0.8843	5.58	10.4517	-15.0634	0.05	2.65843
1499	15.434	16.022	-1.389	0.00114461	16.154	10.468	0.48	10.8	-0.518	-1.24475	8.0056	7.064	14.5152	-1.14		0.1698	5.52	10.2731	-11.9462	0.01	2.12825
1498	15.245	15.566	0.951	-0.255586	14.565	9.967	0.32	10.81	-0.662	-0.845033	7.888	6.693	12.8842	-1.09		0.6311	5.53	9.72587	-12.4537	-0.08	3.09221
1497	15.383	14.807	1.663	-0.252054	14.606	10.347	-1.37	10.34	-2.22	-0.911082	7.9029	6.839	13.9999	-1.57		0.5008	5.4	9.84658	-12.2792	-0.1	3.14041
1496	15.137	15.801	1.166	-0.0633153	15.668	10.622	1.16	11.62	-0.687	-0.648592	7.7501	6.775	14.011	-0.74		0.6056	5.88	9.83149	-11.3799	-0.11	2.10416
1495	15.52	14.867	0.711	-0.999437	14.939	10.124	-0.27	10.47	-0.975	-0.534144	8.8084	6.225	12.34	-2.17		0.7096	5.85	9.77113	-12.7867	-0.07	2.48974
1494	16.013	16.197	-1.076	-0.256807	15.475	10.655	0.6	11.86	-0.9	-1.84432	7.7272	6.43	12.7869	-0.74		0.6148	5.82	10.1352	-12.8275	-0.02	2.53794
1493	15.78	15.92	-0.386	0.0397824	15.322	10.533	-0.3	11.01	-1.719	-1.05628	7.5199	6.41	12.7194	-0.89		0.907	5.97	10.385	-13.4369	-0.04	2.46564
1492	15.674	15.281	0.205	-0.507763	15.891	9.885	0.28	11.12	-0.831	-0.946954	8.9251	6.581	12.6964	-0.02		0.9151	5.73	10.1584	-11.8103	-0.01	2.10416
1491	15.38	15.585	0.318	-0.470577	16.373	10.394	-0.32	11.61	-0.399	-1.10012	7.2836	6.654	12.8569	-2.31		-0.4693	5.41	10.195	-14.5378	0.04	3.4778
1490	15.242	15.152	0.486	-0.202852	17.217	10.347	0.1	11.46	-0.141	-1.04204	7.8245	6.907	13.4653	-0.52		-0.0949	5.65	10.9747	-13.3372	-0.04	1.95956
1489	15.691	15.226	1.584	0.368695	16.71	10.567	-0.39	11.35	-0.3	-0.605888	8.8125	7.087	13.4759	-1.33		-0.0509	5.83	10.727	-13.9171	0.07	2.29695
1488	15.962	15.373	0.227	-0.0816727	16.677	10.295	-1.23	10.92	-0.131	-0.730585	7.7249	7.411	12.3242	-1.39		-0.6169	5.52	10.4304	-13.2964	0.08	2.05596
1487	15.282	15.548	-0.208	-0.208625	15.99	9.873	-0.85	10.28	0.569	-1.44973	8.5699	6.544	14.0524	-0.42		0.1388	5.01	10.634	-17.4058	0.01	3.62239
1486	15.235	14.655	0.13	-0.141721	15.883	9.644	-0.81	10.14	-0.047	-1.54766	7.5689	6.766	12.2661	-0.84		-0.1161	5.4	10.8562	-14.8686	-0.09	4.27307
1485	15.427	15.065	-1.876	-0.0651991	16.41	10.739	0.29	11.41	-1.66	-2.43762	7.7703	7.067	12.0477	-0.5		-0.1629	5.28	10.9664	-14.5424	-0.03	1.91136
1484	15.119	14.605	-0.329	-0.666229	16.385	9.425	0.18	10.52	0.172	-2.33001	7.4387	6.581	11.926	-0.52		-0.149	5.37	10.9331	-13.8084	0.03	1.88726
1483	15.275	14.894	-2.558	-0.0402959	15.195	9.385	-0.01	9.85	-0.161	-2.09542	6.4784	6.943	12.2905	-2.01		-0.651	5.18	10.195	-12.2136	0	1.71857
1482	16.081	14.554	1.289	0.00186379	16.327	9.623	-0.51	10.45	-0.786	-2.1962	8.1098	7.076	12.7028	-0.41		-1.2161	5.47	10.7431	-12.8365	-0.12	2.51384
1481	15.796	15.539	-5.392	-0.451012	15.331	9.751	-0.67	11.29	-0.245	-2.23037	7.4946	6.419	13.3198	-1.54		-0.9766	5.59	9.7485	-12.4174	-0.06	2.77893
1480	15.754	15.506	2.389	-0.42309	15.615	9.828	-0.22	10.68	-0.161	-2.49001	7.6967	6.2	11.9785	-0.53		-0.9288	5.73	9.64195	-11.9077	0.05	2.32105
1479	15.726	15.382	1.681	-0.17276	14.26	9.813	-0.23	10.81	-0.791	-1.85115	7.9281	6.403	13.5299	-0.94		-0.5778	5.31	9.66551	-12.4718	-0.03	2.08006
1478	15.532	15.143	1.719	-0.364891	15.874	9.237	-0.73	9.5	-0.92	-1.97186	7.7446	6.743	14.5417	-0.72		-1.1183	5.36	10.0735	-9.4996	-0.02	2.27285
1477	15.315	14.871	-3.26	-0.142404	16.187	9.38	-0.02	10.06	-0.89	-2.54012	7.4785	6.262	12.8189	-0.79		-1.5311	5.39	10.2589	-11.9915	-0.04	2.75483
1476	14.764	15.336	2.684	-0.515182	16.002	9.311	0.24	9.75	-0.364	-2.24802	7.1218	6.408	14.3091	-0.41		-0.2674	5.17	10.3309	-14.4019	0.06	2.56204
1475	14.287	14.154	0.255	-0.457066	16.34	9.235	-0.16	10.54	-1.173	-1.62339	6.9661	6.403	12.9257	-0.79		0.0346	5.13	10.2589	-10.9948	0.01	3.3814
1474	14.836	14.425	1.729	-0.328233	15.561	9.637	-0.04	10.34	-0.786	-2.71947	7.1415	6.335	10.308	-1.72		-1.0663	5.65	10.4004	-13.2035	0.11	2.15235
1473	14.89	14.315	2.483	-0.499958	15.129	9.094	-0.62	9.69	-1.139	-1.35749	7.0031	6.882	10.9016	-0.37		0.2457	5.25	10.3927	-13.4731	-0.08	3.5501
1472	15.03	14.816	0.083	-0.366622	14.927	9.406	-0.31	9.9	-1.6	-1.64104	5.3641	6.373	10.8638	-2.18		-0.8225	5.42	9.89939	-13.2103	-0.07	3.79109
1471	15.133	14.605	-1.005	-0.506245	14.639	10.191	-0.48	10.39	-1.784	-1.31137	7.5856	6.469	11.8235	-0.25		-0.2476	5.14	9.99632	-14.6352	-0.08	2.34515
1470	15.436	14.209	-0.339	-0.607775	14.976	10.446	-1.07	11.64	-2.081	-1.06425	7.7012	6.613	9.65125	-0.59		-0.4836	5.37	9.74096	-13.5048	-0.04	3.21271
1469	15.006	14.867	-1.346	-0.217268	14.688	9.877	-0.71	10.71	-2.518	-0.605888	7.7026	6.303	9.85469	-0.84		-1.2221	5.32	10.2518	-11.2304	-0.07	2.41744
1468	15.383	14.559	-1.223	-0.583511	15.018	9.976	-0.83	10.95	-1.997	-0.802328	6.7627	6.638	9.87583	-1.82		-0.8791	5.29	10.0118	-10.0614	0.01	7.09265
1467	15.154	14.154	-3.063	-0.654096	14.659	9.756	-0.65	10.26	-1.843	-1.95933	7.7876	6.843	9.62127	-1.28		-0.7742	5.34	10.0889	-14.0802	-0.03	4.41766
1466	14.953	15.097	-4.041	-0.393095	14.635	9.725	-0.25	9.8	-2.384	-1.59265	7.4241	6.061	12.0924	-1.29		-0.0251	5.5	9.6806	-15.5663	-0.01	4.65865
1465	14.757	14.595	2.599	-0.50128	14.985	9.701	-0.38	10.27	-2.042	-1.62168	7.2566	6.672	9.22553	-1.23		-0.2816	5.66	10.0658	-16.486	-0.07	4.03208
1464	14.876	14.743	-0.834	0.00946556	14.598	9.512	-1.09	9.97	-1.511	-2.96602	6.9217	6.807	10.7396	-1.34		-0.1355	5.54	9.8164	-12.9883	0.04	3.95978
1463	15.058	13.873	-0.413	-0.226698	14.762	9.439	-0.87	9.47	-1.545	-1.21742	7.2736	6.524	10.8349	-0.92		0.1362	5.52	9.41545	-12.2271	0	4.08027
1462	14.705	14.66	-1.167	0.0163415	14.519	9.856	-0.51	9.8	-1.416	-1.89499	7.642	7.039	10.9316	-0.72		0.2852	5.11	9.96384	-11.6155	0.04	2.08006
1461	14.978	14.016	-0.196	-0.186197	15.833	9.429	-1.5	9.36	-0.573	-2.26681	6.544	7.358	12.541	-1.69		0.0675	4.97	9.96384	-9.8485	0.07	2.32105
1460	14.866	14.563	-3.412	-0.144038	14.985	9.363	-0.37	9.74	-0.851	-1.95307	7.2165	7.466	12.3056	-0.39		-0.735	5.41	9.94756	-9.7262	0.09	2.85122
1459	14.593	14.775	-3.625	-0.299481	14.458	9.588	-0.44	9.06	-1.506	-1.82154	6.4111	7.078	12.6738	-1.68		-0.7693	5.67	9.01386	-11.7763	0.07	3.3332
1458	14.194	14.034	-2.744	-0.135783	15.623	9.978	-0.56	9.43	-1.481	-0.563183	5.2409	6.941	12.4958	-0.56		-0.5167	5.99	9.51381	-14.4336	0.16	2.61023
1457	14.834	13.629	-0.121	-0.696881	15.549	9.134	-0.93	9.27	-1.63	-1.23962	6.6083	6.401	12.1685	-0.96		-0.3024	5.62	10.3232	-12.064	0.07	1.76677
1456	15.046	14.411	-5.252	-0.545049	15.911	9.55	-0.93	9.8	-1.61	-0.98795	6.8103	6.223	13.1618	-0.49		-0.5985	4.68	10.4004	-12.2249	0.04	4.63455
1455	15.109	14.264	-2.904	-0.594909	15.998	9.757	-1.19	9.84	-1.59	-1.0745	7.3805	6.321	11.7089	-0.68		-0.9686	5.36	10.385	-13.0835	0.03	6.85166
1454	15.392	14.453	-1.138	-0.461124	14.729	9.806	-0.47	9.64	-1.496	-1.7498	7.2583	6.17	12.1667	-0.28		-0.367	5.88	9.5058	-18.8602	0.11	2.20055
1453	15.34	14.172	-6.023	-0.90368	15.364	9.393	-1.62	8.67	-1.029	-1.85343	7.2046	6.695	11.5795	-0.38		-0.5945	5.41	9.84658	-14.2207	0.07	3.26091
1452	14.717	14.927	-2.502	-0.0418043	16.591	10.434	-0.35	10.56	-0.885	-1.81756	7.2973	6.741	13.5307	-0.64		-0.2056	5.49	10.4659	-13.2194	-0.06	2.36924
1451	14.509	14.434	-2.626	0.0493337	16.2	10.426	0.47	11.15	-1.104	-1.21628	7.0535	6.538	11.7522	-1.24		-0.3792	5.76	10.1352	-9.844	0.06	2.77893
1450	14.523	14.641	-3.409	-0.369249	13.939	11.16	-0.06	12.08	-0.498	-0.384394	6.6326	6.332	12.7478	-0.35		0.1755	5.26	9.9557	-11.0537	0.07	3.06812
1449	14.616	15.879	-2.054	-0.372826	16.459	10.151	0.14	11.1	-0.697	-1.2345	7.6788	6.772	14.2872	-1.09		-0.4012	4.61	10.7431	-12.3495	0.07	2.61023
1448	15.189	14.582	-2.005	-0.00424353	15.953	10.043	-0.52	11.37	-0.349	-1.56645	6.7555	6.433	14.1373	-0.92		-1.1504	5.43	9.9557	-12.6213	0.03	3.09221
1447	15.562	15.18	-0.122	-0.278469	15.973	10.132	-0.49	10.98	-0.23	-1.34097	8.3242	6.836	13.4569	-0.41		-0.7148	5.74	11.5854	-12.3359	0.16	4.99604
1446	16.032	14.963	-1.554	0.261045	15.219	10.343	-0.18	11.08	-0.642	-1.2698	9.0308	6.877	11.1794	0.11		-0.3395	5.52	10.4081	-12.0504	0.08	1.95956
1445	16.001	14.655	2.561	0.333086	15.998	10.43	-0.23	11.55	0.261	-1.78168	7.9371	6.478	12.6685	-1.84		-0.9229	5.68	10.8714	-12.2186	0.1	2.77893
1444	15.548	15.575	1.268	0.13739	15.598	10.098	-0.05	10.82	0.102	-2.56346	8.9281	6.296	11.4734	-0.05		-0.5652	5.85	10.6807	-12.5579	0	3.14041
1443	14.936	15.276	2.616	0.334983	16.406	10.103	-0.22	10.98	-0.002	-1.62966	8.0448	6.649	13.5761	-0.35		-1.3507	5.82	10.7512	-13.0321	-0.12	2.20055
1442	14.682	14.738	0.924	0.351352	16.117	10.547	0.14	10.81	0.306	-1.55051	8.2008	6.59	13.8867	-1.2		-1.1347	5.73	9.79377	-13.6498	-0.03	2.22465
1441	15.135	15.428	-2.452	-0.00777263	15.244	10.64	0.25	11.09	-0.568	-1.23336	7.8366	6.503	13.6402	-0.46		-1.9455	5.44	10.3927	-14.4351	-0.05	2.51384
1440	14.67	15.244	-0.664	0.33499	15.932	10.633	-0.23	10.73	-0.032	-0.671368	7.9995	6.524	13.1177	0.35		-0.9978	5.48	10.5795	-12.4106	-0.07	3.09221
1439	14.841	15.424	0.784	0.223591	16.241	10.227	-0.26	10.86	-0.245	-0.676493	8.4048	7.233	13.1211	0.44		-1.5019	5.73	10.5653	-12.2815	-0.12	1.98366
1438	15.42	15.47	0.447	0.349169	16.653	10.829	-0.36	10.74	-0.846	0.197525	7.2777	7.372	13.318	-1.44		-1.4868	5.6	10.0349	-10.3499	-0.08	2.80303
1437	15.597	15.962	1.482	0.0746455	14.614	10.606	0.13	11.19	-0.717	-0.867239	8.8739	6.978	12.8991	0.33		-0.7461	5.77	9.72587	-13.1514	-0.18	2.03186
1436	16.331	15.884	1.429	-0.0989929	16.093	10.723	0.32	11.03	-0.608	-0.173149	8.7685	7.14	12.5509	0.72		-1.0571	5.33	8.80941	-15.3466	0	2.03186
1435	16.027	15.41	-1.768	-0.309688	17.073	10.672	0.22	11.46	-0.583	-0.962897	8.027	6.756	13.8685	-1.2		-0.4993	5.33	10.1429	-12.9944	-0.02	2.89942
1434	15.137	15.161	1.737	0.269606	16.253	10.747	0.46	12.3	0.033	-1.7424	8.3965	6.766	13.2589	1.61		-0.0954	5.78	10.6103	-11.9553	-0.07	2.51384
1433	15.277	14.95	-2.569	-0.0718877	16.562	10.443	0.06	11.38	0.211	-0.700976	9.2834	6.572	12.1112	1.18		-0.6556	5.2	10.3232	-11.4796	0.04	3.69469
1432	15.046	14.545	0.876	0.518412	16.385	10.256	0.35	11.2	-0.201	-1.42581	9.0385	7.441	13.4625	-0.11		-0.8347	5.28	10.6807	-12.4152	-0.19	2.87532
1431	15.086	14.08	1.745	0.224958	17.649	10.018	0.62	11	0.266	-1.29087	8.5397	7.096	12.4712	0.07		-1.1934	5.35	11.034	-10.3061	-0.17	2.80303
1430	15.567	14.904	-0.254	0.0778918	16.286	10.023	-0.1	10.37	-1.005	-0.7824	8.5528	7.026	12.8028	0.6		-0.2779	5.6	10.4943	-9.5337	-0.02	2.05596
1429	15.446	15.157	-0.695	0.0372566	16.801	9.85	0.28	11.56	-0.096	-0.824535	7.8598	7.064	11.107	-0.16		-0.3427	5.35	11.1468	-9.0352	0.04	2.56204
1428	15.576	14.586	1.639	0.0603412	16.739	10.303	-0.22	11.04	-0.325	-1.48218	8.7561	7.429	11.5203	0.23		-0.8187	5.34	11.084	-8.7158	-0.07	2.73073
1427	15.34	14.425	1.189	0.300018	15.924	10.074	0.45	10.75	0.018	-2.04531	7.9027	7.438	11.869	-0.25		-0.0341	5.82	10.9498	-8.4692	-0.11	2.22465
1426	15.063	14.614	1.158	0.156973	17.299	10.327	-0.26	10.81	-0.106	-2.12047	8.5911	7.187	12.2128	0.46		-0.459	4.83	10.7997	-8.3534	-0.09	1.76677
1425	14.808	13.896	1.154	0.172485	17.192	11.106	0.16	11.87	0.067	-0.679909	7.4007	6.677	14.0709	-0.76		-0.746	5.34	11.1328	-10.3152	-0.05	1.91136
1424	15.013	13.344	-0.141	0.182759	16.817	10.815	0.12	12.02	1.065	-1.07336	8.4231	7.06	11.272	0.37		-0.4898	5.45	11.1678	-10.4307	-0.01	1.98366
1423	15.572	14.48	-1.325	-0.476932	16.521	9.917	-1.01	10.62	0.395	-0.685603	8.1232	6.661	12.8256	-1.12		-0.7206	5.37	10.727	-13.0291	-0.16	3.95978
1422	15.987	13.707	-2.327	0.570611	17.102	10.336	0.02	10.52	0.301	-1.88759	8.4506	6.715	12.3047	-0.14		0.0043	5.21	11.1957	-13.9579	0.07	5.52621
1421	15.567	14.434	-1.353	0.0523952	17.312	10.695	-1.04	11.4	0.916	-0.498842	8.4192	6.964	11.8033	-0.13		-0.8174	5.25	11.6958	-10.1294	-0.17	2.15235
1420	15.385	14.568	-2.568	0.434257	17.213	11.198	0.35	10.89	-0.469	-1.6735	7.4811	6.909	10.9062	-1.12		0.1721	5.37	11.4907	-8.4621	0.03	1.93546
1419	15.548	14.701	0.534	-0.0510751	15.722	11.473	-0.57	10.87	-0.042	-0.975424	8.8981	7.13	11.7758	-0.45		-0.157	5.27	10.9248	-10.6187	0	2.41744
1418	15.469	14.609	1.094	0.43696	17.06	10.738	0.7	10.99	0.355	-1.19065	8.5166	6.544	11.4725	1.22		0.3202	5.37	11.2655	-10.9631	-0.22	2.15235
1417	15.378	14.559	0.375	0.387578	15.977	11.291	0.02	11.45	-0.25	-1.56702	6.8306	6.478	11.0048	-0.19		0.4288	5.64	11.0197	-11.8919	-0.19	3.01992
1416	15.315	13.891	0.276	0.276292	15.804	10.659	0.07	11.1	-0.483	-0.81941	8.5504	6.772	11.2623	-0.94	-0.69	0.5047	5.23	10.7027	-13.4958	-0.11	2.15235
1415	15.492	13.901	0.156	0.40486	16.084	10.539	0.03	11.19	0.102	-1.18496	8.2106	6.275	12.5717	-0.08	0.66	0.5582	5.32	10.8934	-10.6142	0.03	2.53794
1414	14.992	13.965	-3.339	0.312677	17.336	10.621	-0.37	11.17	-0.181	-1.32788	7.831	6.351	11.9709	-0.72	0.11	0.2418	5.54	10.8481	-12.0233	-0.14	4.29716
1413	14.953	15.778	-0.013	0.727735	16.117	11.082	0.32	11.53	0.951	-1.41727	8.5482	6.257	12.3491	-0.85	0.19	0.6345	5.73	10.3927	-13.6906	0.05	2.41744
1412	14.479	14.043	-2.48	0.248357	17.48	10.883	-0.44	10.84	0.231	-1.96446	8.3762	6.631	11.3914	-0.33	-0.15	0.4212	5.57	10.6951	-9.7669	-0.14	2.00776
1411	15.081	14.678	-0.623	0.441372	15.265	11.722	0.52	12.25	0.003	-0.370159	8.2426	6.656	13.0497	-0.23	-0.46	0.2365	5.6	9.68815	-11.031	-0.19	2.97172
1410	15.245	14.591	0.096	0.325266	16.48	11.152	0.63	10.91	0.097	0.247632	8.7255	6.727	10.2815	0.66	-0.78	0.449	5.46	10.0966	-14.2886	-0.13	2.36924
1409	15.674	14.614	-1.021	0.366686	17.065	11.51	0.87	11.74	0.489	0.0232912	8.1184	6.526	12.0231	-0.56	0.89	0.3886	5.9	10.7674	-15.2582	-0.02	1.93546
1408	15.714	13.919	-2.285	0.0637181	17.246	11.053	0.33	11.23	0.157	0.0386648	7.7446	6.82	12.1502	0.77	-0.21	-0.5489	5.2	10.7835	-10.9404	0.04	2.08006
1407	15.242	14.029	1.816	-0.189109	17.159	10.843	0	11.11	0.072	0.0546078	8.504	6.41	11.7504	-0.82	0.29	0.3095	5.45	10.5945	-13.1514	0.14	2.44154
1406	15.45	13.937	1.408	-0.0396387	16.805	10.748	0.42	11.82	-0.831	0.60578	8.7869	6.647	12.4055	0.08	-0.07	0.3436	5.54	10.1661	-13.7721	0.11	2.12825
1405	15.193	15.424	-0.656	0.0544084	16.163	10.76	-0.21	11.11	0.44	-0.65998	7.7487	6.398	12.1389	0.01	-1.94	-0.3749	5.61	10.1661	-13.7087	0.12	2.12825
1404	14.168	15.166	0.24	0.214172	16.027	10.134	-0.02	11.34	0.415	-1.50951	8.8545	6.259	12.3	0.03	-1.06	-0.0524	5.7	9.63394	-12.7776	-0.03	2.48974
1403	14.551	14.6	-0.24	-0.650228	17.443	9.83	0.31	10.52	1.085	-0.520479	8.232	6.127	11.9305	0.95	-0.38	-0.4421	5.13	10.1879	-15.5165	0.06	3.06812
1402	14.808	14.876	-4.262	0.0549861	15.59	9.531	0.62	10.59	0.38	-0.156068	8.6224	6.444	12.7725	0.75	0.01	-0.8794	5.48	7.91462	-14.2252	-0.02	2.36924
1401	14.768	14.729	-2.917	-0.533978	15.829	9.102	0.38	10.01	0.112	-1.04375	8.8608	6.296	12.3979	0	-0.38	-0.7989	5.4	9.94756	-13.4006	-0.06	1.98366
1400	14.88	14.361	-0.122	-0.140201	16.834	9.061	0.09	9.24	-0.335	-0.73514	8.2708	6.047	12.8315	-0.46	1.01	-0.1772	5.63	10.8714	-12.875	-0.09	2.97172
1399	15.168	15.589	-2.496	-0.143368	16.257	9.797	-0.02	10.34	-0.553	-0.595069	7.1734	6.303	13.7479	0.16	0.26	-0.9204	5.46	10.1584	-12.8886	-0.05	2.15235
1398	15.959	16.206	-1.879	0.044948	15.792	9.548	0.01	9.85	-0.622	-1.17927	9.3258	6.396	13.3668	0.68	0.14	-0.7755	5.25	10.2802	-14.2524	-0.02	1.86317
1397	15.733	15.525	-1.145	-0.0257902	15.38	9.634	0.34	9.82	-0.399	-2.51563	8.6931	6.597	12.9365	-0.39	-0.58	-0.6387	5.52	9.98013	-13.2556	-0.11	1.81497
1396	16.034	16.532	-1.358	0.2169	15.714	10.406	0.35	10.96	-0.826	-1.86709	8.5491	6.743	12.6394	-0.17	-0.69	-0.8225	5.43	10.195	-14.8731	-0.17	3.67059
1395	15.429	16.505	-0.067	0.0697282	14.194	9.46	0.16	10.05	-0.766	-1.87108	8.9534	6.528	12.3738	-0.1	-1.23	-0.6562	5.69	8.49625	-9.9663	-0.06	2.92352
1394	15.665	15.925	-0.966	0.32791	15.648	9.62	-0.35	9.67	-0.444	-1.21058	8.9425	7.482	11.1055	0.57	-0.56	-1.3639	6.01	10.4375	-12.798	0	2.99582
1393	15.523	14.761	-0.849	0.0187762	15.343	9.642	-0.1	10.14	-0.042	-0.709517	8.2518	7.644	10.7807	-0.55	0.94	-0.1217	5.97	10.0272	-13.976	-0.03	3.62239
1392	14.864	14.632	-4.268	-0.0326102	16.698	9.453	-0.45	10.33	-1.342	-1.24418	8.8568	7.283	11.2229	0.4	-0.18	-0.702	5.52	10.2305	-13.9307	0.04	2.70663
1391	14.948	13.845	-0.992	-0.0152835	17.019	10.096	0.13	10.72	-0.082	-1.31307	9.2813	7.685	11.5459	0.41	-2.24	-0.6965	5.35	10.3772	-12.8886	-0.07	2.75483
1390	15.616	14.168	-1.301	0.0650912	16.962	9.644	1.17	10.01	-0.389	-1.97869	8.7536	7.146	11.0603	-0.11	-0.06	-0.11	5.46	10.0658	-12.8161	-0.03	2.92352
1389	15.698	14.264	-1.972	0.156917	16.599	9.034	-0.38	9.59	-0.067	0.104145	8.5793	6.886	11.5102	-0.67	-0.25	-0.9855	5.45	10.0195	-10.5372	-0.03	2.65843
1388	15.273	13.937	-0.317	0.310814	15.804	9.502	0.09	9.9	-0.196	0.159945	8.5244	6.731	11.3893	-0.36	-0.83	-0.233	5.2	9.2037	-11.1669	-0.09	3.09221
1387	15.418	14.71	-4.035	0.159477	17.135	10.028	-0.23	10.93	0.296	-0.586528	8.855	7.815	11.2854	0.34	-0.53	-1.0057	5.32	10.4375	-16.8304	-0.14	2.53794
1386	15.156	14.283	-1.628	-0.183128	16.64	9.986	0.55	10.47	1.154	-0.806883	8.405	8.239	10.2679	-0.37	0.09	-0.5002	5.29	10.8562	-15.7113	-0.11	1.91136
1385	15.289	14.858	1.292	-0.661291	16.797	9.432	-0.2	9.55	0.757	-0.927025	8.3109	7.951	11.985	0.2	-0.19	0.446	5.61	10.5085	-13.7404	-0.07	3.16451
1384	15.091	14.195	0.109	-0.0936462	16.933	9.958	0.71	10.24	0.688	-0.596778	8.73	7.589	10.8686	-0.05	0.2	-0.0799	5.3	11.2864	-10.3967	-0.11	2.63433
1383	14.953	14.467	-5.979	-0.0818722	16.113	10.316	1.18	11.06	-0.543	-0.35991	7.8469	7.543	11.9639	-0.61	-0.04	0.2588	5.54	10.1737	-11.7741	-0.07	2.17645
1382	14.747	14.388	-0.288	-0.312846	16.249	9.932	-0.02	10.57	-1.064	-1.03578	8.0211	8.147	11.6257	0.15	0.65	-0.5181	5.56	9.53783	-12.3087	-0.04	2.41744
1381	14.18	13.947	-2.107	0.0637821	15.71	10.799	0.2	11.04	-0.161	-0.946954	8.427	7.789	11.7717	0.37	0.64	0.0982	5.63	8.62696	-13.9941	-0.16	2.05596
1380	14.184	14.034	-4.373	0.01747	15.751	10.372	0.27	11.05	-0.479	-1.23848	7.7478	7.404	12.1717	-1.1	-0.24	0.6157	5.46	11.0769	-13.2284	-0.07	1.74267
1379	14.455	14.871	-4.028	-0.338476	16.533	10.065	0.78	10.94	-0.776	-1.69058	7.8578	7.482	11.1612	0.3	-1.21	0.5834	5.07	11.2585	-13.1327	-0.06	1.93546
1378	14.715	14.448	0.81	-0.186676	15.767	9.748	0.47	10.36	-1.228	-1.50439	7.4937	7.114	11.9779	-1.32	-0.81	0.5222	4.85	10.9498	-13.0902	0.1	1.95956
1377	14.467	15.079	-1.387	-0.384519	16.603	9.517	-0.48	9.97	-1.387	-2.04133	8.6936	6.478	12.6869	-0.27	-0.47	0.7826	5.22	10.4588	-13.0155	0.09	1.67037
1376	14.936	15.552	0.619	-0.712045	15.796	9.264	-0.17	10.55	-1.019	-2.2167	7.5839	7.046	11.2463	-0.24	0.81	0.657	5.31	11.1119	-12.6547	0.09	1.81497
1375	15.653	14.563	-0.133	-0.362344	15.813	9.9	-0.35	10.31	-0.98	-1.84887	7.5734	6.941	12.776	-0.44	-0.51	1.0474	5.38	10.5156	-12.0158	-0.04	1.86317
1374	15.35	14.232	-1.085	-0.145795	16.121	10.694	0.38	11.89	-0.99	-1.2288	8.2066	7.055	12.4361	-0.26	1.45	-0.0842	5.65	10.9982	-11.4067	-0.09	2.29695
1373	15.656	14.48	-0.533	-0.208402	16.035	10.544	-0.65	10.74	-0.394	-1.32959	7.3001	6.718	9.64248	-0.19	1.11	0.0445	4.82	10.195	-11.1352	-0.04	2.89942
1372	15.277	14.49	-6.154	-0.0113663	15.998	10.776	0.08	11.72	-0.359	-1.99122	8.7946	7.023	10.4058	-0.18	-0.75	0.5856	5.29	9.89939	-11.5611	-0.11	2.51384
1371	15.308	14.881	-1.94	-0.245143	16.233	10.187	0.63	11.03	-0.29	-1.82382	8.0458	6.859	12.9537	-0.37	0.12	0.7296	4.89	8.13118	-12.576	-0.12	4.32126
1370	14.883	13.638	-0.611	0.225171	14.952	9.652	-0.31	9.99	-0.697	-1.47136	7.8924	7.657	11.785	-0.16	-0.19	-0.0164	5.25	9.54584	-11.543	-0.13	5.67081
1369	14.722	14.439	1.044	-0.49753	15.149	9.954	0.12	10.34	-0.98	-2.29129	7.506	6.599	11.0778	1.27	-0.9	0.2117	5.77	10.266	-9.989	-0.12	2.51384
1368	15.319	14.08	0.4	-0.167572	16.228	10.462	0.89	11.09	-0.493	-1.77656	8.0902	7.91	12.2491	-0.56	-0.31	0.2284	4.97	10.6182	-10.3701	-0.16	2.05596
1367	15.485	13.5	1.247	-0.241079	15.734	10.981	-0.09	10.18	0.023	-1.99805	7.3335	7.701	12.0736	-0.77	-0.63	-0.7807	5.67	9.78622	-10.9676	-0.01	2.94762
1366	15.448	13.381	-1.318	-0.223852	15.759	11.083	0.23	11.16	-0.801	-2.35108	7.2612	7.187	12.33	0.04	-0.04	-0.3929	5.36	10.2305	-11.4571	0.14	2.34515
1365	15.217	14.936	0.496	-0.367711	16.731	10.239	0.26	11.01	0.564	-2.65741	8.1486	7.153	12.7333	0.72	-0.13	-0.0905	5.05	10.0118	-11.9128	0.14	3.23681
1364	15.081	14.025	1.305	-0.540975	15.854	9.397	0.45	10.83	-0.002	-2.68019	7.4552	7.281	12.7963	-0.31	0.35	-0.3306	4.97	9.58589	-12.1139	-0.1	2.22465
1363	14.754	15.355	-0.69	0.0879784	16.294	9.429	-0.43	9.39	0.092	-2.47293	7.7256	6.633	13.0266	-0.33	0.45	-0.6843	5.23	10.5724	-12.0509	-0.2	2.08006
1362	14.78	14.729	1.417	0.0127049	16.134	9.687	0.18	11.03	-0.717	-3.21541	7.9095	6.688	14.3797	0.14	1.45	-0.6303	5.07	10.0889	-11.8898	-0.13	1.86317
1361	14.834	15.042	-1.896	0.129438	15.792	9.951	-0.1	10.52	0.137	-3.41755	7.5805	6.601	12.5032	0	-0.13	-0.553	5.12	10.0349	-11.6719	-0.13	4.63455
1360	15.401	14.319	-0.468	-0.266189	15.121	9.764	0.15	10.13	-0.816	-2.1609	7.3242	7.162	12.5139	-0.22	-0.5	-0.7705	4.92	10.5866	-11.4388	-0.21	4.36946
1359	15.539	14.931	-1.841	0.439071	16.204	9.823	0.2	10.53	-0.166	-1.9804	7.0095	7.067	13.0124	-0.75	0.17	-0.4844	5.03	11.1259	-11.1443	-0.17	1.98366
1358	15.506	15.042	0.27	-0.329193	15.969	9.829	-0.02	9.97	-0.707	-2.72631	7.7931	7.203	12.8359	-0.79	-1.33	-0.2498	5.44	9.99632	-12.3359	-0.17	2.70663
1357	15.66	15.267	0.012	0.00481919	16.294	9.652	-0.48	10.9	-0.811	-2.25542	6.715	6.864	12.4944	-1.48	-1.74	-0.2013	5.67	9.93128	-13.097	-0.1	2.80303
1356	15.695	14.816	0.171	-0.0545545	16.504	10.295	0.08	11.6	-1.198	-2.69499	8.6358	7.431	13.474	-0.51	-0.36	0.4389	5.38	10.5795	-13.5174	-0.16	3.4778
1355	15.63	14.522	0.969	-0.219265	16.105	9.889	-0.21	10.63	-1.67	-2.46496	7.857	7.165	13.2031	-1	0.14	0.5006	5.19	10.727	-13.7087	-0.09	2.85122
1354	15.77	15.598	-3.978	-0.0232748	16.492	9.704	0.9	11.06	-0.583	-3.2399	7.6189	7.723	13.7248	0.79	1.01	0.7748	4.69	10.9911	-13.5093	-0.09	3.06812
1353	15.31	14.729	0.119	-0.0667095	15.796	9.434	0.47	10.24	-1.352	-3.18353	7.1961	7.438	13.0721	-0.22	-1.01	0.4843	5.19	10.8077	-13.2466	0.02	4.15257
1352	14.642	14.241	-1.477	0.0747241	15.94	9.902	-0.28	11.23	-0.88	-2.59592	7.9903	7.498	12.0641	0.43	-0.29	-0.3363	5.54	10.544	-12.0504	0.13	3.69469
1351	15.207	14.798	0.074	0.0151615	16.196	9.429	0.28	11.56	-1.387	-2.52133	7.0559	6.709	11.8022	-0.07	-0.8	-0.6784	5.8	10.9331	-12.2317	0.14	4.48996
1350	15.084	14.812	-1.131	0.314489	15.586	9.137	-0.1	10.36	-1.541	-2.71435	6.6792	6.608	12.4353	-0.89	-0.99	-0.8114	5.15	10.9498	-12.1842	0.2	3.4296
1349	15.037	15.009	-1.401	-0.0899505	14.828	8.91	-0.71	9.59	-1.694	-2.9683	6.9264	7.368	12.2497	-0.54	-1.13	-1.3386	5.34	10.9007	-12.0799	-0.19	2.53794
1348	15.039	15.879	-0.756	-0.00106868	15.928	8.594	-1.37	9.12	-2.464	-2.87435	7.0998	6.383	11.8694	-0.41	-0.76	-1.3427	5.02	9.98827	-11.9755	-0.1	2.44154
1347	14.859	15.516	-6.495	0.250118	16.933	9.654	-0.1	10.28	-1.982	-2.2241	6.921	6.791	13.1326	-0.3	-0.13	-1.1523	5.09	10.6951	-11.9281	-0.18	4.53815
1346	15.254	15.506	-1.495	0.271971	15.8	9.082	-0.96	9.14	-1.888	-2.35905	7.5485	7.187	12.6881	0.15	0.18	-0.6864	4.74	9.51381	-12.0107	-0.13	1.98366
1345	15.523	15.419	-0.571	0.10082	16.801	9.441	0.06	9.54	-1.392	-2.14097	6.7545	6.85	12.888	-2.39	0.7	0.1193	4.93	11.1957	-12.2171	-0.03	2.08006
1344	15.305	15.29	0.429	-0.636377	16.142	9.4	-0.33	9.48	-1.496	-2.33001	7.0454	6.469	12.8846	-0.07	0.99	0.1873	5.23	10.0118	-12.4854	-0.01	2.99582
1343	15.009	15.442	-1.885	-0.297873	16.224	10.069	0	10.38	-1.01	-1.93542	6.4246	6.902	12.3623	-1	0.94	0.1447	5.33	10.4004	-12.7537	0.07	4.39356
1342	15.378	15.874	-6.547	-0.321357	15.656	9.903	0.12	10.07	-1.268	-1.8409	6.141	7.459	12.2977	-3.18	-0.43	0.036	5.33	10.9331	-12.9601	0.25	4.82734
1341	15.359	14.66	-0.144	-0.189519	15.71	10.466	-0.53	10.56	-0.786	-1.56702	6.7728	7.135	11.6323	-0.46	-0.87	-0.7076	5.46	10.7997	-13.0427	0.16	2.89942
1340	15.721	15.631	-0.625	0.0920885	15.516	10.161	-0.19	10.64	-0.662	-1.99862	7.5068	6.994	12.3067	0.1	-0.52	-0.6634	4.77	10.4233	-10.5598	0.28	3.69469
1339	15.553	15.175	-1.153	0.151425	15.866	10.834	-0.82	10.89	-1.014	-2.48033	6.9377	7.466	12.6907	-1.51	0.6	-0.7964	5.6	10.6576	-11.1171	0.2	3.01992
1338	15.462	14.687	-1.89	0.199725	14.511	9.791	0.38	9.71	-1.729	-2.21613	7.3274	7.689	12.8311	0.2	-2.22	0.2313	5.17	10.3157	-12.277	-0.15	3.11631
1337	15.733	14.623	-1.249	-0.133383	14.832	10.356	-0.23	10.48	-0.776	-2.74282	6.7062	7.972	13.0254	-0.03	1.04	-0.6299	4.97	10.6103	-10.886	-0.19	4.32126
1336	15.868	15.663	-2.655	-0.0441118	13.333	10.214	-0.04	10.62	-1.144	-2.57143	7.0121	7.799	14.0849	-0.63	0.26	-0.459	5.27	9.52982	-12.0084	0.2	2.51384
1335	15.581	14.789	-0.41	-0.246268	15.269	10.07	-0.33	10.43	-0.399	-2.70296	6.3877	7.377	12.968	-2.24	0.04	-0.5349	5.37	11.0125	-13.2964	0.14	3.526
1334	15.123	14.752	-3.067	0.185615	15.644	9.866	0.61	11.41	0.172	-2.39378	7.3793	7.628	12.8466	0.42	0.18	-0.745	5.54	9.64996	-13.5846	0.12	3.4296
1333	15.158	14.352	-2.826	0.136019	15.549	9.151	-0.24	9.37	-0.245	-2.9962	7.7116	7.352	11.5778	-1.05	-1.18	-0.5598	5.43	10.3464	-13.7728	0	2.39334
1332	15.21	13.845	-2.621	-0.0544254	17.011	9.222	-0.41	10.18	-0.201	-2.96147	6.6349	7.892	10.7803	-0.17	-1.04	-0.6652	5.84	10.6103	-13.8401	0.09	3.98388
1331	15.791	15.092	-1.963	-0.0461749	16.097	9.981	0.9	11.01	-2.483	-2.00602	7.8414	7.837	11.5139	-0.04	-0.16	-0.2039	5.69	9.94756	-13.5931	*	3.91158
1330	15.366	14.71	-4.325	-0.0587245	15.705	9.266	-0.15	9.56	-1.049	-1.97528	5.2801	7.561	10.7665	-2.02	-0.21	-1.0697	5.44	9.48978	-12.9756	0.16	3.04402
1329	15.158	15.134	-1.738	-0.470698	16.904	9.502	-0.34	10.23	-0.136	-2.46439	8.6596	7.286	12.151	0.19	1.13	-0.7119	5.26	10.004	-12.1728	0.16	3.26091
1328	15.056	14.522	-2.79	0.230605	16.97	9.435	0.12	9	0.683	-2.67677	8.8579	7.605	13.324	-0.61	-1.9	-0.6769	5.51	10.8641	-11.37	0.01	3.5742
1327	15.217	14.209	1.325	0.374062	15.92	9.834	-0.74	10.72	-0.052	-1.7088	9.0634	7.187	12.208	-0.35	-0.81	-0.4095	5.3	10.6418	-10.7525	0.1	2.56204
1326	15.023	14.462	-0.135	-0.0575279	16.224	9.575	0.18	10.18	-0.429	-2.35051	7.9675	7.368	11.1791	-0.76	-0.37	-0.2271	5.23	10.6418	-10.5055	-0.01	2.58614
1325	14.708	13.675	1.15	0.34478	16.191	9.809	-0.59	10.28	-0.136	-2.04702	8.007	7.374	11.865	-1.63	-1.38	-1.1493	5.7	10.8077	-10.7838	-0.05	3.11631
1324	14.932	13.873	-1.322	0.17448	15.878	9.69	-0.01	10.31	-0.469	-2.22296	8.072	7.146	12.3554	-0.62	-0.36	-0.6937	5.73	10.2021	-11.3009	-0.1	2.61023
1323	14.439	14.812	-4.125	0.00123967	15.911	10.086	-0.51	10.21	-0.057	-2.22638	8.4381	7.593	11.2711	-0.68	0.44	-1.1915	5.89	10.8481	-11.5792	-0.01	5.16473
1322	13.909	14.651	-0.382	0.274194	15.059	10.107	-0.21	9.93	-0.414	-1.93542	8.4329	7.954	14.4365	-1.1	0.7	-0.7203	6.06	9.90693	-11.4932	-0.05	2.41744
1321	14.049	14.871	-0.407	0.223219	15.508	10.551	0.63	9.96	0.052	-1.94738	6.8724	7.862	12.3599	-2.28	-0.71	0.0521	5.64	10.9747	-10.433	-0.09	2.61023
1320	14.196	14.959	-1.729	0.356704	15.24	9.372	0.24	10.16	-0.364	-2.43193	8.4948	8.113	13.5764	-0.13	-0.15	-0.0092	5.82	10.6497	-11.6653	-0.1	1.98366
1319	14.383	14.549	-0.859	-0.315799	14.33	10.144	-0.45	10.5	-0.861	-2.05841	8.4142	7.892	12.3565	-0.6	-0.27	-0.5985	5.71	9.93128	-12.8977	0.04	1.88726
1318	14.962	14.117	-1.836	0.2319	15.491	10.099	0.47	11.24	-0.384	-2.79179	8.0316	8.421	13.5515	-2.29	-0.65	0.1037	5.12	10.2731	-12.8705	-0.06	2.32105
1317	15.354	14.54	-0.762	-0.666766	16.282	9.549	-0.58	10.49	-0.449	-1.46966	8.8235	8.033	13.1101	-0.47	0.82	-0.6607	5.68	9.86921	-12.7834	0	2.46564
1316	15.579	14.379	-0.859	-0.0634197	15.462	10.226	0.2	11.49	-1.223	-0.530159	10.098	7.447	12.7585	-0.87	-0.06	0.5142	5.32	9.56186	-12.632	0.25	2.03186
1315	15.231	15.097	-1.057	-0.341206	15.364	10.02	-0.5	11.59	-1.347	-1.42297	9.3587	7.121	14.3137	-0.12	0.01	0.6143	5.52	10.9747	-12.4643	-0.16	2.22465
1314	15.147	14.503	0.556	0.0262958	15.557	8.976	-1.23	9.42	-0.186	-1.25784	9.0231	7.137	13.0651	-0.69	-0.03	0.5391	5.47	11.2585	-12.3284	0.09	5.67081
1313	15.305	15.125	1.199	0.0292142	16.093	8.796	-0.97	9.51	0.003	-1.41499	9.2098	7.292	13.3025	-0.67	0.53	0.3017	5.33	11.0412	-12.2725	-0.04	2.63433
1312	15.667	14.333	-3.972	0.347747	16.801	9.671	-0.31	10.12	-0.201	-1.40588	8.1882	6.793	12.5609	-0.36	0.69	1.2585	5.6	10.7835	-12.2838	0	4.92374
1311	15.917	13.418	2.277	0.196135	16.447	10.458	0.08	10.79	-0.384	-1.21172	9.2254	7.121	13.052	-1.55	-0.65	0.6413	5.5	11.091	-12.316	0.08	2.85122
1310	15.693	13.459	1.789	0.110783	16.789	10.28	-0.61	11.12	-1.684	-0.907097	8.7662	7.386	12.9714	-0.13	-0.73	1.5458	5.17	10.7674	-12.3664	0.22	3.21271
1309	15.985	14.08	1.398	0.0232576	16.784	10.827	-0.64	10.4	-0.523	-1.08589	8.7838	7.564	10.7575	0.65	-0.94	0.8171	5.3	10.8239	-12.4323	0.05	4.32126
1308	15.667	14.789	-0.124	-0.166549	16.776	11.378	0.07	11.38	-0.9	-2.7952	8.5519	6.884	13.7913	0.36	0.12	0.9667	5.45	10.9164	-12.5111	0.1	2.39334
1307	16.09	13.836	1.444	0.246227	16.241	11.247	0.32	11.18	-1.898	-2.42908	8.0822	8.116	12.9056	-0.2	0.38	1.6476	5.03	10.0272	-12.6001	0.2	2.17645
1306	15.684	13.933	-1.253	-0.164283	15.817	12.058	0.7	11.74	-1.089	-2.08175	8.4453	7.244	12.577	-0.19	0.8	0.781	5.6	10.8934	-12.6966	0.08	1.86317
1305	15.432	13.496	-0.016	-0.320608	15.417	10.942	0.18	10.92	-1.278	-1.56759	7.3971	7.219	13.2815	-0.24	-0.48	0.9249	5.02	11.2515	-12.798	0.08	1.91136
1304	15.651	14.756	-1.139	-0.185592	15.907	10.452	0.24	10.66	-1.56	-2.18709	8.0023	6.736	12.5262	-0.99	-0.45	1.1344	5.37	10.6261	-12.9638	0.09	3.16451
1303	14.752	14.72	-0.704	0.12703	15.825	10.429	-0.07	10.19	-1.853	-0.765887	8.082	6.451	11.2191	-1.17	1.79	1.1041	5.89	10.2802	-13.2196	0.19	2.08006
1302	14.483	14.333	-3.561	-0.20381	16.13	10.552	0.28	10.37	-1.228	-1.34382	7.5909	6.18	11.5719	-0.35	-0.1	-0.0339	5.1	10.1352	-13.5118	0.05	4.77914
1301	14.822	14.821	-1.949	0.189448	16.764	10.667	-0.2	10.06	-1.292	-1.30339	8.0157	6.902	12.2205	-0.26	-0.35	0.8909	5.19	9.52982	-13.7868	0.08	2.85122
1300	14.593	14.77	-5.307	-0.15321	16.068	10.478	0.54	10.05	-1.377	-2.54752	7.5198	6.832	11.8411	-1.45	0.18	0.4935	5.02	9.83149	-13.9911	-0.17	6.61067
1299	14.82	13.919	-2.851	-0.306495	15.504	10.263	-0.34	9.89	-0.97	-1.71905	7.6378	6.959	11.2417	0.57	-0.03	0.3744	5.19	9.67306	-14.0712	0.03	2.89942
1298	15.086	15.695	-2.167	-0.564934	16.076	10.56	-0.08	10.8	-0.588	-1.10069	7.5702	7.381	11.6157	-1.43	-1.95	0.3113	4.88	9.55385	-14.0556	*	4.44176
1297	14.649	14.761	-1.943	-0.169743	15.845	9.496	-0.74	10.02	-0.002	-0.63151	7.7247	7.372	11.5007	-0.49	-0.98	-0.3838	5.33	9.37894	-14.0032	*	3.4778
1296	15.133	15.088	0.309	-0.487262	15.928	10.042	-0.68	9.56	-0.652	-1.43435	7.441	7.942	12.1548	-0.49	-0.01	-0.887	5.22	10.8158	-12.7844	0.03	2.77893
1295	14.679	14.398	-2.101	-0.449135	16.694	10.014	0.04	11.11	-0.617	-1.21058	8.3648	7.564	11.7457	0.12	-0.04	-0.5716	4.79	10.9164	-11.5974	0.11	2.41744
1294	14.892	13.763	-3.507	-0.537851	15.491	9.984	-0.55	9.85	-1.665	-1.79478	7.5612	7.607	11.3863	-0.7	0.4	-0.8642	5.09	9.89184	-9.842	0.17	3.4778
1293	14.574	14.876	-3.451	-0.622067	15.751	9.74	-0.06	10.4	-1.759	-1.91037	7.4885	7.199	10.219	-0.48	0.19	-0.3492	4.96	8.86782	-8.7294	-0.19	4.61045
1292	14.621	14.421	0.695	-0.210812	16.023	10.066	-0.76	10.11	-0.975	-1.34895	7.8989	7.306	11.2202	-1.12	-0.61	-0.163	4.7	9.29862	-10.1022	-0.19	3.18861
1291	14.56	15.447	-1.915	-0.251439	14.865	9.934	-0.59	10.08	-1.759	-1.30795	7.4199	7.368	11.6261	-1.66	0.45	0.3817	5.27	10.0966	-10.1747	-0.05	3.30911
1290	14.691	15.861	-2.935	-0.525065	16.587	10.133	-0.74	10.33	-1.555	-1.04432	7.0702	7.222	11.3589	-1.94	-0.2	0.2388	4.71	10.5085	-9.3818	-0.03	3.98388
1289	14.759	15.019	-1.75	-0.299562	15.747	10.351	-0.74	11.01	-0.851	-2.00659	7.3624	6.925	11.8638	-1.15	0.67	0.3163	4.66	9.6806	-9.4543	-0.17	4.44176
1288	14.507	15.207	1.528	-0.290166	16.109	10.368	0.16	10.46	-1.541	-0.897986	7.1086	6.839	12.3222	-1.54	1.22	0.862	5.09	9.05767	-11.16	-0.15	3.23681
1287	14.901	15.424	0.063	-0.331954	15.858	10.166	0.26	11.08	-2.245	-0.871225	7.3055	7.14	13.9617	-2.05	0.04	0.945	4.98	8.98465	-12.8025	-0.17	3.3332
1286	15.035	15.709	-3.326	-0.565182	15.998	10.713	-0.01	11.19	-0.831	-0.979979	8.0611	7.192	13.032	-1.19	-1.08	-0.209	4.85	9.24751	-12.8019	-0.04	3.69469
1285	14.831	13.832	-1.739	-0.780156	16.509	10.221	0.4	11.35	-0.856	-1.70254	7.9822	7.673	13.3979	-0.96	-0.03	1.7661	4.75	9.93128	-12.7998	-0.1	5.16473
1284	14.661	14.333	0.124	-0.464162	15.92	9.716	0.22	10.57	-1.317	-2.23093	7.7195	7.199	12.2322	-0.52	0.95	2.0586	5.22	10.2021	-12.7961	-0.07	2.63433
1283	14.493	14.287	-0.138	-0.219443	15.45	10.403	-0.43	11.34	-2.22	-0.934427	7.88	7.327	11.3101	-0.19	-0.85	1.1014	5.06	9.76359	-12.7909	-0.02	2.56204
1282	14.353	15.106	-0.976	-0.0998944	15.907	9.564	-0.75	9.97	-1.536	-1.40702	8.0111	7.47	12.4603	-1.43	-3.37	1.4377	4.97	9.482	-12.7839	-0.07	2.41744
1281	14.722	13.689	-0.499	-0.791128	16.492	9.384	-1.04	10.26	-1.228	-0.931011	7.5626	7.527	13.0969	-0.64	-0.61	1.1439	5	10.3387	-12.7751	-0.08	3.76699
1280	15.191	14.733	-1.231	-0.337686	16.018	9.611	-0.95	10.54	-1.044	-1.28574	7.8766	6.658	11.9183	-1.12	0.17	0.9972	4.86	9.6806	-12.7644	-0.04	2.29695
1279	14.574	14.595	-0.483	-0.30662	16.241	9.625	-1.09	10.57	-0.826	-1.24247	8.7144	6.668	12.8718	-0.33	0.96	0.5054	4.76	9.01386	-12.7517	0.02	4.70685
1278	14.32	15.088	-4.85	-0.461518	16.163	10.233	-0.65	10.5	-2.201	-0.785816	7.5455	6.795	12.7394	-1.62	0.6	-0.359	4.84	9.30592	-12.7369	0.08	3.11631
1277	14.677	14.692	-1.064	-0.174361	15.821	9.886	-1.41	10.09	-1.183	-0.478913	8.2889	7.502	11.4687	0.07	-0.37	-0.8042	4.85	9.55385	-12.7199	-0.09	2.24875
1276	15.569	14.692	0.287	-0.337648	15.883	10.328	-0.76	10.61	-1.188	-1.24759	8.4669	7.785	13.0315	-0.9	0.02	0.0424	4.87	9.76359	-12.7006	0.06	2.99582
1275	15.446	15.603	0.403	-0.0765989	15.059	10.665	-0.81	11.38	-0.627	-0.661119	7.7909	7.723	11.4461	-1.48	-0.49	-0.024	5.18	9.10878	-12.6788	-0.23	2.17645
1274	15.361	15.534	-0.085	-0.0223312	15.417	10.044	-1.25	10.61	0.385	0.113255	9.2012	7.272	11.3446	0.69	-0.66	-0.4261	5.47	8.30745	-12.6547	-0.15	2.29695
1273	15.13	14.931	0.297	-0.412469	15.413	10.236	-0.82	11.47	0.003	-1.02496	8.6794	8.284	12.9799	-1.13	0.71	-0.4922	5.16	9.38624	-12.6279	-0.08	2.05596
1272	14.894	14.798	-0.252	-0.248463	14.997	10.427	-0.53	11.48	-0.091	-1.03122	8.3673	7.229	14.1118	-1.45	-0.03	-0.6351	5.09	8.5253	-12.5984	-0.08	3.83928
1271	15.27	14.729	-0.907	-0.62253	16.307	9.996	0.02	11.32	-0.191	-1.1935	9.9561	7.429	12.9209	0.42	0.92	0.3145	4.89	9.35704	-12.5662	-0.24	3.69469
1270	14.911	14.485	-3.496	-0.119341	16.822	10.219	-0.37	11.27	-0.156	-2.38353	8.9367	7.441	13.3871	-1.36	0.3	0.4049	4.88	9.44466	-12.5311	-0.14	3.01992
1269	15.121	15.037	1.651	-0.110973	16.249	9.883	-0.2	11.95	-0.325	-2.34595	8.5213	7.97	12.2456	-0.98	-0.08	0.7591	5.42	10.1044	-12.493	-0.14	2.94762
1268	14.897	14.72	1.811	-0.362786	16.579	9.862	-1.5	10.89	-0.776	-2.31464	9.4301	7.238	12.3609	-0.86	-1.48	-0.053	5.37	9.9557	-12.4518	0.07	3.3573
1267	15.004	15.032	-0.169	-0.1286	16.315	9.608	-0.72	10.89	-1.039	-2.80147	9.5362	6.759	12.0753	-0.34	-0.01	-0.7746	5.17	10.266	-12.4075	0	4.27307
1266	15.154	14.844	0.483	-0.048849	15.915	9.782	-0.92	11.31	-0.459	-2.22581	8.9202	7.598	13.8612	-0.03	0.96	-0.4122	4.7	9.83149	-12.3599	0.09	3.26091
1265	15.14	14.977	-0.284	-0.468716	16.517	9.895	-0.31	10.83	-0.751	-3.32759	8.7883	7.548	12.6859	-0.44	0.12	-0.4401	4.76	10.7835	-12.309	0.01	3.04402
1264	15.383	14.651	0.106	-0.0127242	15.722	9.621	-1.06	10.38	-1	-1.37514	8.4901	7.397	11.1352	-0.96	-0.86	-1.4663	5.23	10.6807	-12.2546	-0.04	3.04402
1263	15.289	14.204	-1.713	0.119777	15.594	8.917	-0.08	9.78	0.018	-2.44275	8.5455	6.855	12.9958	-0.95	-2.1	-0.3613	4.78	10.9414	-12.1967	-0.17	3.86338
1262	15.282	14.052	0.844	-0.146463	14.779	9.314	-0.44	9.95	0.092	-3.25527	8.3189	6.232	12.5796	-0.76	0.14	-0.9316	4.89	10.1661	-12.1351	0.2	4.17667
1261	15.116	14.375	-0.002	-0.0555364	14.004	9.625	-0.24	10.08	-0.915	-1.74695	8.7399	6.67	12.0671	-0.95	-0.68	-1.7206	5.15	9.26941	-12.0698	0.09	3.71879
1260	15.081	15.138	-1.112	-0.342738	13.963	9.496	-0.02	9.96	0.112	-2.76218	8.7398	7.575	11.8906	-0.9	-0.88	-0.4709	5.1	10.3927	-12.0006	-0.09	5.57441
1259	15.009	15.332	-4.249	-0.301521	14.198	9.488	-0.3	9.69	-0.3	-3.25983	8.9166	7.787	11.365	-0.68	0.34	-0.4769	5.77	10.2376	-11.6803	-0.1	3.69469
1258	14.985	14.651	0.404	-0.49788	15.454	10.387	-0.55	10.57	-0.831	-2.36133	7.6093	8.022	14.1033	-2.64	-1	-1.0387	5.04	9.32053	-11.068	0.18	2.68253
1257	14.729	14.485	1.258	-0.232872	16.381	11.013	0.68	12.1	0.077	-1.83691	8.9444	8.389	12.3039	-1.25	0.09	-0.9042	6.05	9.80886	-10.4734	0.06	3.01992
1256	14.787	14.761	0.022	-0.237548	16.55	10.357	0.22	10.51	-0.836	-2.58851	7.7927	7.167	13.4329	-1.23	0.55	-1.5025	5.73	10.3772	-10.2064	0.02	5.45392
1255	15.326	14.89	0.636	-0.252541	16.747	10.602	0.15	10.83	0.107	-2.21898	8.2769	7.917	14.0388	-0.48	0.67	-1.3041	5.92	10.5511	-11.3301	0.03	4.12847
1254	15.941	15.355	-1.174	-0.0975809	16.76	10.517	-0.18	10.63	-1.273	-2.47919	7.8473	7.242	13.0109	-1.4	-1.33	-0.8828	5.51	10.2518	-11.7197	0.04	4.05617
1253	15.658	15.447	-0.162	0.0436425	16.529	11.092	0.62	11.53	-0.449	-1.72019	8.3276	6.836	15.3558	-0.85	0.11	-0.907	6.1	10.6261	-11.3301	0.12	5.21293
1252	15.499	15.92	-0.96	-0.132747	17.291	9.56	-0.31	10.32	-0.667	-2.933	8.3903	6.487	14.7693	-0.43	-0.08	-0.8547	6.08	10.4233	-10.9404	0.12	6.12869
1251	15.175	15.102	1.284	-0.0319824	16.101	10.233	0.36	10.69	-0.816	-2.69043	8.396	6.316	14.1046	-1.12	0.8	-0.3496	6.21	10.3618	-10.9699	0.03	5.8154
1250	14.971	14.582	1.875	-0.0818541	16.418	10.713	0.57	11.34	-0.707	-2.19506	8.4018	6.845	14.4051	-1.61	-0.23	-0.8343	5.46	10.735	-10.9993	0	2.44154
1249	15.217	15.35	1.967	0.163817	17.13	9.967	0.25	10.79	-0.414	-2.05215	7.488	6.941	13.5046	-1.58	-0.82	-1.1486	5.39	10.1584	-10.8271	0.05	2.85122
1248	15.745	16.749	0.088	-0.115077	16.228	9.888	-0.01	10.38	-0.364	-4.16061	8.0513	7.587	12.7308	-1.26	-0.64	-0.9066	5.53	10.832	-11.2213	0.03	4.68275
1247	15.439	15.64	-0.29	0.152787	16.34	9.256	-0.11	9.79	0.112	-0.646315	7.7032	7.299	14.9405	-0.6	-0.7	-0.6245	5.89	9.93128	-11.6155	0.11	2.56204
1246	15.364	15.525	-1.142	0.0247477	16.369	9.776	-0.39	10.08	0.211	-0.701546	8.0039	7.042	13.8446	-0.09	-1.39	-0.4063	5.52	10.6497	-9.9799	0.16	4.32126
1245	15.357	16.56	-0.414	0.080591	15.281	9.563	-0.11	10.42	-0.216	-1.28347	7.2833	7.028	14.2038	-0.4	-0.53	-0.5893	6.39	9.24021	-11.2508	-0.05	3.23681
1244	15.074	16.123	-1.278	-0.21834	16.018	9.808	0.12	9.42	-0.211	-1.97755	7.3921	7.315	13.9844	-0.98	-1.23	-1.0716		8.85322	-12.5216	0.12	3.30911
1243	14.862	15.258	-0.279	-0.0231333	15.948	9.176	-0.13	9.71	0.132	-1.32389	7.7671	7.149	15.4722	-0.71	1.27	-0.6047		9.33513	-11.808	0.06	2.68253
1242	15.018	15.552	0.352	-0.413717	15.137	9.354	-0.1	9.91	-0.528	-1.16959	7.8632	6.975	14.0325	-0.23	-0.21	-0.0978		9.482	-10.5372	0.05	2.97172
1241	15.861	15.152	0.883	0.433043	16.331	9.36	0.09	9.69	0.335	-3.19378	8.1542	6.465	13.5338	-0.34	-0.17	-0.3828		9.34243	-8.9877	0.1	1.91136
1240	15.331	15.58	1.035	0.135193	15.899	9.17	0.04	9.55	0.201	-1.97812	8.0384	6.959	12.3114	-0.78	0.28	-0.6647		9.48978	-7.9954	0.12	2.27285
1239	15.093	14.563	-1.104	0.235009	15.487	9.676	-0.62	10.11	0.693	-1.14567	7.6723	7.607	12.1908	-1.51	-0.11	-0.7667		9.71078	-9.3003	0.2	3.95978
1238	15.21	14.085	-1.428	0.0784673	14.589	9.289	-0.8	8.93	0.628	-0.91336	7.7462	7.213	11.799	-1.57	0.67	-1.6025		9.92314	-10.6051	0.07	3.74289
1237	15.151	15.87	0.52	-0.0307708	16.525	10.062	-0.98	11.1	-0.831	-0.985673	7.7072	7.149	13.5033	-0.82	1.05	-0.2479		10.3695	-10.4784	0.12	3.11631
1236	14.925	15.663	-2.504	-0.256236	15.351	9.793	0.02	10.09	-1.292	-0.794357	7.5645	6.481	13.3632	-1.59	-1.34	-1.073		10.0889	-10.1996	0.04	2.68253
1235	14.404	15.175	-1.076	-0.0864791	14.997	10.054	0.18	10.14	-0.866	-1.34951	7.8253	6.567	12.1112	-1.34	-0.13	-0.6973		9.82394	-9.9209	0.02	3.59829
1234	14.799	15.046	-1.896	-0.0359841	16.43	9.478	-0.23	10.55	-1.153	-0.757916	7.2529	6.022	13.118	-1.38	-0.76	-0.5613		10.7835	-9.7941	0.05	3.79109
1233	15.305	15.341	-1.803	-0.221002	15.994	9.497	-0.22	10.31	-0.88	-0.985103	7.1915	6.592	11.5081	-1.25	-0.84	-1.3394		10.5085	-9.8826	0.09	4.56225
1232	15.172	14.963	0.019	-0.197663	16.113	9.124	-0.69	8.96	-0.498	-0.817702	6.9629	6.857	12.0115	-0.6	-1.16	-2.6979		10.3772	-10.0773	0.04	2.61023
1231	15.044	15.396	0.165	-0.285198	16.756	9.322	-0.16	9.65	-0.568	-1.35122	7.3696	7.338	11.7112	-0.96	-0.76	-1.5822		10.2447	-10.272	0.15	2.46564
1230	15.14	14.402	0.101	0.108459	15.219	9.789	-0.64	8.86	0.365	-1.5972	5.9954	7.078	11.7138	-1.48	-1.35	-1.0986		7.16035	-10.3605	0.09	4.36946
1229	14.85	14.48	3.059	-0.334073	15.705	9.148	-0.47	9.69	0.281	-2.10908	6.465	7.256	13.4227	-0.63	-1.13	-1.259		9.45196	-9.4453	0.08	2.34515
1228	15.212	15.93	0.17	0.00602061	16.434	10.223	0.04	9.46	-0.111	-2.69955	7.1006	6.941	14.7361	-0.51	1.13	-1.8905		8.97735	-9.4634	0.16	2.53794
1227	14.593	15.405	-0.58	-0.120808	16.459	10.59	0.94	12.15	-0.543	-1.83407	7.1271	6.688	14.2243	-0.66	0.71	-2.3892		9.08687	-9.5139	0.19	5.71901
1226	15.02	14.591	-0.062	-0.348809	16.101	9.933	-0.3	9.78	0.266	-1.95022	7.5455	7.536	12.7286	-0.28	0.14	-1.1561		10.3618	-9.5905	0.07	3.21271
1225	14.983	15.585	0.977	-0.457251	16.109	10.945	-0.36	10.9	0.052	-1.94965	7.4047	6.982	13.361	-0.88	0.17	-1.3528		9.83149	-9.6872	0.01	3.59829
1224	14.736	15.566	0.93	-0.305569	15.075	10.607	0.32	11.15	-0.523	-1.813	8.0801	7.229	13.4497	0.38	1.61	-0.6697		10.544	-9.7979	-0.09	6.08049
1223	14.978	16.045	0.802	-0.0204374	14.943	10.196	-0.33	10.85	-0.682	-2.09599	6.1768	7.219	13.5838	-1.87	1.11	-1.2715		10.2305	-9.9165	-0.13	3.91158
1222	15.217	15.47	-1.347	-0.0557527	15.607	9.92	0.05	10.57	0.246	-2.47976	6.6789	7.199	12.4921	-1.15	1.24	-0.3003		10.4517	-10.1194	0.2	4.65865
1221	15.086	15.833	-2.948	-0.232317	15.829	10.57	0.4	11.98	-0.007	-1.73955	6.8314	7.596	11.043	-0.74	2.76	-0.6441		10.6103	-10.429	0.18	3.526
1220	14.899	15.157	-2.341	-0.479074	15.64	9.973	0.11	10.57	-0.201	-2.02538	7.1604	7.789	12.4453	-0.75	1.35	-1.0602		10.3927	-10.7582	0.08	4.03208
1219	14.983	15.511	-0.813	-0.049049	15.714	10.068	0.25	10.88	-0.22	-1.63023	7.3455	7.281	12.3817	-0.75	-0.83	-1.1413		10.0503	-11.0196	0.14	5.45392
1218	15.179	14.108	-1.901	-0.305814	16.406	10.454	0.18	11.29	-1.049	-1.79535	7.2667	7.144	14.0901	-0.48	-2.74	-0.2431		11.2166	-11.1262	-0.09	3.95978
1217	14.757	15.037	-1.245	-0.258648	15.495	10.52	0.67	11.86	-0.836	-2.4678	7.245	6.871	14.1771	-1.33	-1.32	-0.0735		10.8481	-11.0775	-0.14	6.10459
1216	14.514	14.908	-0.603	-0.107846	14.803	10.081	0.56	10.85	-0.657	-1.27435	6.6995	7.153	12.5737	-1.15	-0.74	-0.868		10.9911	-10.9495	0.05	3.69469
1215	14.476	15.428	-0.959	-0.5722	14.993	9.171	0.21	10.1	-0.439	-1.72019	7.4416	6.688	11.7452	-0.55	0.73	-1.8996		11.2027	-10.1237	0.2	5.14063
1214	14.191	15.566	-1.629	-0.222416	15.656	9.801	0.54	11.01	0.236	-2.00602	7.1505	6.72	14.9911	-0.92	-0.24	-0.7684		11.4764	-9.3773	0.06	3.28501
1213	14.437	14.835	-3.721	-0.290021	15.874	9.536	1.05	10.72	-0.146	-2.32204	8.2274	6.823	12.6423	0.01	0.11	-0.5847		10.9664	-9.9448	-0.08	2.08006
1212	14.724	15.175	0.087	-0.116389	15.668	10.257	0.51	10.98	0.072	-2.19222	6.6866	5.956	12.5077	-1.06	0.22	-0.39		11.6222	-11.1497	-0.01	3.67059
1211	14.918	14.996	0.1	-0.108336	16.023	9.708	0.68	10.33	-0.126	-1.35863	8.6116	6.77	13.0745	0.04	-1	-0.4472		10.7997	-12.2453	0.02	4.00798
1210	15.039	14.715	-1.658	-0.0972105	15.479	8.744	0.23	9.92	0.052	-0.749944	7.3747	6.98	12.8292	-0.2	-1.07	-1.1082		10.9248	-12.9535	0.04	3.4055
1209	15.1	15.235	-1.015	-0.0680804	14.972	9.293	0.23	10.66	-0.747	-2.02197	6.9494	7.042	13.8108	-0.46	-1.62	-0.6074		10.2021	-13.6226	0.02	3.5742
1208	15.114	14.522	-1.089	0.061264	14.585	9.069	-0.28	9.82	-0.598	-1.14226	8.0359	7.6	12.9963	-0.65	-0.63	-0.6534		11.2655	-14.5418	0.06	2.89942
1207	15.91	14.885	-3.923	-0.716146	16.196	8.977	-0.04	9.8	-0.91	-1.57158	6.9382	7.153	14.2591	-0.98	-1.6	-0.9577		10.4081	-15.1042	0.09	4.65865
1206	15.623	14.724	-2.639	-0.593033	15.817	9.523	0.61	10.17	0.464	-1.1787	7.7353	6.925	15.1595	-0.89	0.29	-0.5925		10.8158	-15.0891	0.01	2.80303
1205	15.086	14.066	-1.457	0.320328	14.614	9.607	0.44	10.33	0.504	-2.20133	8.173	6.784	13.4844	-0.72	0.39	-0.4158		10.5156	-15.0453	-0.02	2.77893
1204	14.754	13.671	0.356	-0.165216	14.841	9.874	0.68	11.02	-0.935	-1.30966	7.6594	6.845	12.6909	-0.71	-0.06	-0.2385		9.84658	-14.9746	-0.01	2.20055
1203	15.747	15.299	1.719	-0.166861	15.273	9.586	0.31	10.18	-0.196	-1.60062	7.3624	6.362	13.4178	-0.55	-0.42	-0.5934		9.9557	-14.8791	0.08	4.61045
1202	14.967	14.899	0.277	0.0740312	15.063	9.286	-0.06	9.41	-0.766	-1.49243	7.858	7.201	13.7497	-0.21	-0.83	-1.9436		9.78622	-14.7608	-0.07	3.4537
1201	14.708	14.729	-0.469	-0.160984	15.635	9.359	0.26	9.71	-0.687	-1.34154	7.0662	7.349	14.1817	-1.93	-0.31	-0.7601		9.45926	-14.6217	0.08	4.89964
1200	15.098	14.02	0.139	-0.460392	14.223	9.308	0.26	10.28	-0.98	-0.632649	5.91	7.308	14.0164	-1.19	-0.87	-0.6862		10.1584	-14.4636	0.14	2.89942
1199	15.289	14.453	1.319	-0.126872	15.413	9.621	0.25	11.11	-1.049	-0.513077	7.9163	7.028	12.1778	-1.1	0.67			10.3927	-14.2887	0.1	2.34515
1198	14.834	15.088	-1.398	-0.244861	16.138	8.797	0.7	10.28	-0.871	-1.42923	7.7827	6.77	14.1596	-0.79	-1.58			9.77868	-14.099	0.05	1.98366
1197	14.757	14.563	-0.158	-0.462197	14.709	9.738	0.03	9.58	-1.357	-1.49927	7.6107	7.331	13.0661	-0.88	1.45			9.75605	-13.8963	-0.03	2.03186
1196	15.035	15.746	-0.826	-0.112342	14.857	9.835	0.1	10.3	-0.895	-0.863253	7.8621	6.768	14.4354	-0.59	0.31			10.0118	-13.6826	0.21	2.34515
1195	15.385	14.715	-0.206	-0.0563341	15.701	9.775	0.47	10.27	-0.027	-1.56076	7.2581	6.991	13.2916	-0.7	-0.39			10.4004	-13.4601	0.28	2.34515
1194	15.728	14.43	0.482	-0.282759	15.014	9.826	0.01	9.06	-0.533	-2.58225	7.6726	7.452	13.1804	-0.17	-0.74			9.64996	-13.2306	0.12	2.77893
1193	15.31	15.382	-0.306	-0.0433162	15.759	10.072	-0.15	10.98	-0.89	-1.79307	7.8062	6.957	12.7902	-0.68	-0.02			9.43005	-12.9961	-0.21	2.82713
1192	14.74	14.913	0.496	-0.0472413	15.689	10.272	-0.2	9.86	-0.742	-2.00546	7.3084	7.055	13.8766	-0.79	1.29			9.29132	-12.7587	0.09	2.53794
1191	14.857	14.503	0.364	-0.375863	14.923	9.905	0.12	10.26	-1.173	-1.58183	8.3416	6.227	14.895	-0.31	-1.55			11.5928	-12.5202	-0.17	2.24875
1190	15.467	15.12	-0.078	0.0435189	14.486	9.664	0.07	10.01	-0.905	-1.29258	8.1217	6.193	14.3341	0	-0.46			10.3618	-12.2828	0.1	3.04402
1189	15.06	14.996	1.306	-0.0381678	15.207	9.56	-0.07	9.62	-0.434	-1.15023	7.2536	6.538	14.6422	0	-1.25			6.77556	-12.0483	0.01	3.3814
1188	15.801	15.575	2.432	0.0956392	15.602	10.215	0.08	10.98	-0.722	-2.10624	7.1997	6.978	13.1944	-1.69	-1.36			10.7835	-11.8188	-0.07	4.53815
1187	15.28	14.591	0.135	0.17762	15.376	9.7	0.04	10.81	-0.727	-1.26638	7.7554	7.213	14.1439	-0.14	-0.94			10.6103	-11.5962	-0.07	3.09221
1186	14.836	15.267	0.212	0.209225	15.071	9.611	-0.19	10.41	0.395	-1.12517	9.0565	7.003	16.5788	-0.3	0.65			11.2795	-11.3826	0.29	2.12825
1185	14.201	14.338	0.363	0.158537	15.944	9.888	-0.16	11.36	0.033	-0.846172	7.9521	7.242	12.9083	-0.34	1.08			10.634	-11.1799	0.29	4.08027
1184	14.425	14.623	-0.047	0.356724	14.902	10.195	0.26	11.26	-0.414	-1.86083	8.656	6.718	13.6195	-0.77	0.35			10.4304	-10.9901	0.16	2.10416
1183	14.616	14.931	-1.983	-0.0251545	15.87	10.163	-0.03	10.76	-0.568	-1.77713	8.4034	6.889	12.5401	-0.17	-0.83			10.9248	-10.8152	0.16	1.69447
1182	14.654	14.72	-0.944	-0.13714	15.837	9.394	-0.29	9.87	-0.34	-1.55791	8.1746	6.515	12.9525	-1.11	0.6			10.2802	-10.6572	0.07	1.79087
1181	15.198	14.048	0.413	-0.133954	15.269	10.052	-0.5	10.93	-0.483	-2.1478	8.0427	7.509	11.4505	-0.23	0.29			9.96384	-10.5181	0.03	2.51384
1180	16.093	14.885	-4.615	-0.0836713	14.915	10.429	-0.02	11.63	-0.603	-3.0167	8.18	6.745	15.2918	-0.22	0			11.034	-10.3998	-0.09	3.4296
1179	15.66	14.526	-0.796	0.0716381	15.306	9.848	-0.1	10.51	-0.622	-1.4725	8.2323	7.47	12.6884	-1.09	0.22			10.1429	-10.3043	-0.03	2.39334
1178	15.249	14.163	-3.058	-0.0597735	14.902	10.282	0.2	11.02	-0.707	-1.55905	8.5168	7.317	12.6794	0.58	-0.38			9.38624	-10.2336	0.01	2.10416
1177	15.56	15.355	-1.497	0.00617444	14.511	9.956	0.25	10.5	-0.012	-1.47535	7.7657	6.813	14.2338	-0.88	0.03				-10.1898	0.05	2.20055
1176	15.186	14.747	-0.502	-0.229416	15.318	10.53	-0.66	11.01	0.082	-1.24759	8.1329	6.367	13.4425	-0.61	-0.27				-10.1747	-0.06	2.63433
1175	15.287	15.672	1.018	0.186488	15.524	11.248	-0.04	11.84	-0.98	-1.0671	8.6167	6.544	14.8722	0.18	-1.05				-10.2307	0.14	2.32105
1174	15.319	15.111	-0.898	0.0217929	16.055	10.321	-0.35	11.54	-1.59	-0.817133	8.2322	6.558	14.0771	-0.17	-0.92				-10.3806	0.08	1.98366
1173	15.256	15.373	-0.368	-0.031404	15.738	11.198	-0.38	11.62	-0.24	-1.57044	8.4192	6.159	13.216	0.18	-0.36				-10.5976	0.21	3.01992
1172	15.228	15.069	-4.139	-0.253586	15.948	10.584	-0.22	11.76	-0.861	-1.9041	7.7823	6.622	14.9567	-0.97	0.34				-10.8549	0.11	3.4537
1171	15.46	15.529	-1.684	-0.337904	15.854	10.513	-0.42	11.02	-0.841	-1.76973	9.0762	7.267	13.2817	0.49	-0.57				-11.1256	-0.01	2.34515
1170	14.957	15.437	-5.854	-0.382391	16.076	10.627	0.02	11.94	0.861	-1.79364	8.3825	6.761	16.0316	-0.17	0.05				-11.3829	0.02	2.48974
1169	15.177	14.812	0.699	0.218124	16.611	10.827	-0.2	11.31	-0.032	-1.08019	8.4471	6.378	15.8596	-0.29	0.81				-11.5999	0.11	1.98366
1168	15.093	14.71	0.897	-0.23049	16.266	10.827	0.45	12.41	-0.086	-1.35065	8.7403	7.181	16.5436	-0.56	-1.35				-11.7498	-0.01	1.98366
1167	15.198	15.157	-1.302	0.0274445	14.783	10.311	-0.13	11.78	0.062	-1.6103	7.8759	7.767	14.899	0.26	1.44				-11.8058	-0.03	2.48974
1166	15.422	14.715	-2.47	-0.0884364	15.804	10.467	0.03	11.7	-0.26	-0.565461	7.7307	7.425	14.686	-0.09	0.48				-11.5212	0	2.61023
1165	15.962	14.835	-1.837	-0.162476	16.644	10.981	-0.11	11.59	0.226	-1.57442	8.1374	7.276	14.8702	-0.08	0.82				-10.8409	0.01	3.30911
1164	15.614	15.134	-0.226	-0.0484173	16.175	10.762	0.52	11.79	0.072	-2.45129	8.0323	7.185	13.4931	-0.42	-1.03				-10.0245	-0.02	3.26091
1163	15.434	15.019	-0.225	-0.0528847	16.48	10.521	-0.3	11.72	0.514	-1.67521	7.6585	7.516	15.7445	-0.35	0.4				-9.332	-0.08	3.01992
1162	15.625	15.24	-1.604	-0.603368	16.55	10.361	0.43	12.03	0.817	-1.23165	7.9816	7.201	15.4832	0.08	-0.15				-8.8554	-0.05	2.10416
1161	15.943	15.562	-1.508	0.115104	15.932	10.345	0.5	12.34	1.869	-1.95193	7.5694	7.548	14.0435	-0.99	-2.15				-8.3398	0.02	2.48974
1160	16.118	15.649	-1.253	-0.0105361	16.352	10.031	0.44	12.02	1.566	-1.35976	7.4269	6.72	14.9715	-1.83	-1.47				-7.3506	-0.17	2.08006
1159	16.116	14.444	-0.877	-0.236572	14.935	9.736	0.26	11.4	0.494	-0.606457	7.4436	7.06	15.5675	-0.18					-6.6724	-0.02	2.39334
1158	15.665	15.479	-0.549	0.153385	15.578	9.682	0.54	11.51	-0.032	0.138878	6.9315	7.133	15.6641	-0.66					-6.9971	-0.13	2.77893
1157	15.058	15.957	-3.2	-0.235375	16.443	9.664	-0.09	10.97	0.539	-1.255	6.9534	7.34	15.6766	-1.01					-7.8413	-0.05	1.81497
1156	14.556	15.428	-1.305	-0.108784	16.307	9.316	0.18	10.44	0.415	-1.22368	7.8224	7.379	15.205	-0.21					-9.0103	0.02	2.15235
1155	15.105	15.787	-0.531	0.128348	14.639	9.525	0.6	11.46	0.286	-0.74425	8.031	7.368	15.1944	-0.41					-11.2983	-0.02	3.71879
1154	15.546	16.611	-1.088	-0.2739	15.145	8.936	0.17	10.71	0.315	0.239091	7.8061	7.288	13.4226	-0.45					-11.0835	0.1	1.86317
1153	15.471	15.773	1.238	-0.221383	15.038	9.292	0.26	10.53	0.534	0.02443	8.0739	6.982	14.0652	-0.03					-10.5466	0.12	1.76677
1152	15.296	15.598	0.361	-0.661876	15.306	9.228	0.03	10.65	-1.526	-0.226103	7.6411	6.722	15.3177	-0.36					-9.8485	0.1	2.82713
1151	15.116	15.221	-2.136	-0.688541	15.611	9.133	0.01	10.7	-1.332	-0.458984	7.6119	6.572	15.3956	0.11					-9.1504	0.13	2.20055
1150	15.555	14.549	-0.695	-0.525137	15.504	9.074	0.3	9.9	0.633	-0.539838	8.0978	6.638	14.5079	-0.29					-8.6135	0.06	2.46564
1149	15.495	15.203	-0.666	-0.359146	14.433	9.332	0.03	10.5	0.33	0.163362	7.2506	6.469	15.9967	0					-8.3987	0.07	2.89942
1148	15.429	15.125	-0.958	-0.254149	14.033	9.362	0.07	9.81	-0.325	0.17418	7.8251	7.016	14.4397	-0.21					-8.4504	0.03	4.10437
1147	14.672	15.327	0.94	-0.0466827	14.651	9.082	-0.03	10.24	-1.947	-0.764179	7.5576	7.327	14.1531	-0.97					-8.5837	0.11	2.89942
1146	14.584	15.194	1.887	-0.209145	15.561	8.952	-0.24	9.49	-0.057	-0.661688	8.0248	7.089	13.9539	-0.53					-8.766	-0.01	3.526
1145	14.1	14.453	-0.941	-0.405236	15.561	8.889	-0.36	9.71	-0.533	-0.457276	7.1921	7.486	14.9145	-0.74					-8.9646	0.09	2.20055
1144	14.722	15.06	2.803	-0.277841	15.314	8.78	-0.04	9.4	-0.801	-0.115641	7.8278	7.951	13.3545	-0.17					-9.147	0.14	3.4778
1143	15.411	15.194	1.962	-0.0119409	15.195	8.772	0.33	10.06	-0.201	-0.863253	8.2847	7.167	15.0668	-0.8					-9.2803	0.05	3.98388
1142	14.981	15.272	0.858	-0.152145	15.862	8.873	-0.4	9.53	-0.583	-0.580835	6.2022	6.82	14.2267	-0.8					-9.332	-0.03	3.5742
1141	15.245	14.77	0.282	0.0326807	14.404	9.061	0.23	10.03	-0.682	-0.169733	7.8005	6.412	11.8818	-0.69					-9.2228	0.01	3.21271
1140	15.037	15.102	-3.297	0.430115	15.532	8.788	0.07	9.81	-0.295	-0.489732	7.292	6.494	12.0825	-0.82					-9.0199	-0.02	3.3814
1139	15.273	15.281	0.712	-0.063052	14.976	8.533	0.06	9.23	0.574	-0.699268	6.9704	6.38	14.9323	-0.35					-8.9106	-0.13	3.11631
1138	15.156	14.89	-0.005	-0.280414	14.919	8.671	-0.02	9.7	-0.101	-1.63023	6.6403	6.296	11.4767	-0.28					-9.9731	0.03	3.04402
1137	15.46	15.065	1.141	-0.0171881	14.293	8.815	-0.3	9.81	-0.608	-1.44745	7.3728	6.323	12.9588	-0.85					-11.0356	0.22	4.39356
1136	15.392	14.066	-2.429	-0.247145	14.742	9.134	-0.56	10.1	-0.99	-1.15421	7.1603	6.248	12.922	-0.27					-9.9119	-0.17	2.41744
1135	15.07	14.094	-0.454	-0.173259	14.215	9.329	0.53	10.99	-0.558	-1.5061	7.7878	6.875	13.2467	-0.32					-8.7883	-0.09	2.29695
1134	15.282	13.882	-1.134	-0.209653	15.343	9.104	-0.05	10.11	-0.275	-2.1478	7.7367	6.243	13.0312	-0.78					-8.8629	-0.06	2.00776
1133	15.161	15.12	-0.564	-0.215491	15.598	8.669	-0.6	9.45	-0.325	-1.48674	7.754	6.642	12.258	-0.62					-9.0536	0.05	1.98366
1132	14.806	14.798	-1.507	-0.263854	15.104	9.021	0.21	10.24	-0.871	-2.43819	7.4671	8.002	10.5714	-0.45					-9.3107	-0.04	2.34515
1131	14.593	14.375	0.489	-0.203115	15.203	8.957	-0.43	9.95	-0.265	-2.04019	7.9713	7.712	10.7968	-0.65					-9.5847	0.02	4.24897
1130	15.189	14.858	0.94	-0.60041	15.224	8.396	-0.86	8.56	-0.717	-1.47364	7.8081	7.333	11.747	-0.97					-9.8258	-0.03	2.10416
1129	14.934	14.968	0.126	-0.516469	15.104	8.981	-0.42	9.86	-1.446	-1.70709	7.5205	7.712	11.1564	-0.8					-10.0321	-0.08	4.20077
1128	14.588	14.646	-0.664	-0.320825	14.738	8.664	-0.9	9.61	-0.384	-2.15976	8.3221	7.213	11.351	-0.55					-10.2358	0.07	2.99582
1127	15.018	14.802	-1.243	-0.638514	14.75	9.321	-0.99	9.32	-0.389	-1.5061	7.5893	7.078	13.7699	-0.24					-10.4385	-0.14	5.57441
1126	15.142	14.945	-0.482	-0.145961	13.832	9.602	-0.28	11.94	-0.498	-0.999338	7.2593	6.973	12.9896	-0.99					-10.642	-0.07	4.41766
1125	15.324	15.221	-3.18	-0.11246	14.54	9.11	-0.21	10.49	-0.032	-2.09029	7.7221	6.925	14.3675	-0.39					-10.848	0	2.44154
1124	15.88	15.212	-1.646	-0.426064	15.541	9.385	0.01	11.18	-0.101	-2.43478	7.5056	7.493	14.075	-0.51					-11.0581	-0.03	2.00776
1123	15.581	14.789	-2.576	0.0792203	15.355	9.915	-0.12	12.02	-0.211	-0.550657	7.6903	7.233	14.2637	-0.41					-11.2741	0.09	2.27285
1122	15.39	14.365	-3.726	0.0361943	15.141	9.364	0.02	11.79	-1.545	0.892754	7.9022	6.686	12.8941	-0.74					-11.4977	0.04	2.39334
1121	15.796	13.27	-2.034	-0.300171	14.383	9.332	-0.02	11.06	-1.436	-0.308095	7.7558	6.622	12.6381	-0.27					-11.7795	-0.02	2.00776
1120	15.21	13.997	-1.43	-0.192826	14.322	9.122	0.53	10.99	-0.603	-0.384963	7.831	7.057	14.2214	-0.83					-12.1033	0.04	2.05596
1119	15.495	15.217	0.477	-0.1248	15.145	8.993	-0.26	9.83	-0.95	-2.08574	7.8355	6.843	12.9579	0.34					-12.37	-0.03	1.91136
1118	15.102	14.991	-2.887	-0.0454239	15.174	9.362	0.14	10.99	-1.332	-1.91606	6.9322	7.121	13.7143	-1.24					-12.4809	-0.01	2.65843
1117	15.168	14.342	0.708	-0.113473	14.878	9.215	-0.44	10.11	-1.506	-2.1683	8.3058	6.688	13.1742	-0.27					-11.9281	0.05	2.99582
1116	14.745	14.48	0.051	0.134776	15.022	9.725	-0.22	10.38	-1.273	-1.17243	7.6843	7.012	11.9669	-0.75					-10.8206	-0.19	2.05596
1115	14.941	14.724	-1.393	-0.375277	14.367	9.889	-0.98	10.44	-0.965	-0.88546	8.1342	7.156	10.2343	-1.19					-9.9844	0.06	2.10416
1114	14.656	14.996	-2.209	-0.327873	14.787	9.85	-0.04	11.44	-1.099	-1.61656	8.0024	7.753	11.8277	-0.42					-9.5735	0.18	2.99582
1113	14.595	14.14	-1.884	-0.117742	15.042	10.199	-0.34	12.19	-0.439	-0.572294	8.6452	7.445	11.9207	-0.32					-9.2557	0.26	3.5742
1112	15.063	14.508	-2.644	-0.372791	14.35	9.77	-0.03	10.9	-0.945	-0.867808	8.5489	6.985	14.0166	0.03					-9.1281	-0.08	2.70663
1111	15.34	14.112	-1.461	0.0428162	15.186	10.261	-1.37	10.79	0.043	-2.06809	8.4857	7.251	12.1513	-0.99					-9.6627	-0.17	2.05596
1110	15.172	13.694	-1.792	-0.377023	16.369	9.096	-0.28	9.47	-0.811	-1.3125	8.9828	7.395	12.8141	0.62					-10.1974	-0.01	2.46564
1109	14.953	13.781	-4.782	-0.178838	15.014	10.518	-0.84	10.54	-0.756	-1.25613	7.9194	7.732	11.5603	0.14					-9.7839	0.17	3.26091
1108	14.864	13.74	-0.728	-0.230784	16.171	9.907	0.5	10.8	-0.598	-2.72118	7.7492	7.52	12.0621	-0.23					-9.016	0.11	2.89942
1107	14.579	15.184	1.058	-0.0514809	15.862	10.011	-0.38	10.77	-0.737	-2.46894	8.5688	7.853	11.9563	0.28					-8.6025	0.28	3.4778
1106	14.376	14.283	1.088	0.276733	16.554	10.293	0.65	11.83	0.291	-2.61698	7.7992	7.529	12.5099	0.05					-9.1442	0.2	2.97172
1105	14.598	14.867	0.915	0.238009	15.475	10.044	0.34	11.28	0.038	-1.6325	8.1218	6.937	12.358	-0.56					-10.1853	0.15	2.80303
1104	14.63	14.637	1.23	0.340929	16.068	10.394	0.82	11.23	-0.895	-1.48788	9.1166	8.093	10.7897	-0.45					-10.8498	0.16	2.56204
1103	14.897	15.525	1.205	-0.324297	16.488	9.801	1.13	11.33	-0.662	-2.86182	7.8539	7.602	12.2703	-0.05					-10.9749	0.03	3.3573
1102	15.147	15.24	0.033	-0.041042	15.804	10.394	0.74	11.23	-0.106	-2.37784	8.3165	6.866	12.3752	-0.45					-11.0718	-0.33	2.29695
1101	15.441	16.063	-1.775	-0.117361	14.26	10.16	0.65	11.14	-0.454	-2.1609	8.4275	6.722	11.7532	-0.41					-11.2483	-0.24	2.34515
1100	15.109	15.253	-3.712	0.0340225	14.12	10.013	0.06	10.71	-0.201	-1.82894	8.6508	6.843	13.1914	-0.38					-11.4425	0.02	2.75483
1099	15.471	15.272	-3.252	0.198687	14.495	9.886	-0.01	10.77	0.395	-1.13087	7.6005	6.613	13.24	-0.83					-11.5339	-0.08	3.04402
1098	14.967	15.184	-3.016	-0.072996	16.727	10.335	-0.6	11.17	-0.459	-0.747097	8.0707	6.98	13.5323	-0.14					-11.3663	-0.16	5.35752
1097	14.539	14.968	-0.223	0.313692	15.133	10.649	-0.16	11.92	0.043	-1.57955	8.7221	7.169	13.167	0.4					-11.1987	-0.1	3.76699
1096	14.85	15.088	-1.052	0.391713	14.845	9.757	-0.56	10.47	-0.667	-0.452152	8.4483	7.762	14.4389	0.26					-11.4569	-0.13	3.526
1095	14.92	14.936	0.798	-0.001389	16.08	10.513	-0.04	11.05	-0.742	-1.54026	7.3071	7.463	14.308	-0.89					-11.7152	-0.18	6.20099
1094	14.752	15.161	-0.891	0.0425509	15.627	11.04	-0.46	12.12	-0.161	-1.78111	7.3943	6.572	14.0284	-0.14					-11.1941	-0.22	5.35752
1093	14.929	14.296	-1.47	0.371883	16.657	11.532	0.34	12.2	-0.235	-1.70652	9.1477	7.39	14.6353	-0.67					-10.6731	0.04	3.83928
1092	15.147	14.94	-2.295	0.145505	16.377	12.215	1.2	13.47	-0.613	-2.55606	7.8537	7.096	13.1794	-0.5					-11.3321	-0.01	3.59829
1091	15.387	14.945	1.525	0.422213	17.641	11.907	0.42	12.95	-0.791	-3.32815	8.4283	6.82	14.2285	-0.58					-12.5559	-0.17	3.16451
1090	15.13	14.301	1.756	0.335008	16.126	10.602	0.03	11.81	-0.975	-1.6177	7.969	7.81	15.8361	-1.12					-13.2148	-0.04	3.79109
1089	15.112	13.418	0.392	0.141223	15.602	11.579	-0.71	12.48	-0.349	-2.26567	7.6586	7.967	15.7309	-0.62					-12.5534	-0.05	2.41744
1088	15.658	13.132	-3.682	0.137868	16.175	10.641	0.53	12.31	-1.039	-1.65129	8.0687	7.97	15.128	-1					-12.2282	-0.07	2.61023
1087	16.184	13.293	1.115	-0.425283	16.702	10.13	-0.34	11.63	-0.057	-2.29926	8.5853	7.808	13.75	-0.76					-11.9409	-0.09	3.11631
1086	15.759	13.896	-1.311	-0.30529	17.901	10.005	1.23	12.34	-0.359	-1.67407	8.332	7.965	14.7371	-0.6					-11.6881	0.01	2.80303
1085	15.186	15.295	-1.865	0.336218	17.686	10.04	-0.32	10.98	-0.082	-1.60119	8.7934	8.394	13.4319	-0.07					-11.4663	-0.03	2.48974
1084	15.102	13.951	0.387	-0.477327	17.522	9.544	0.6	10.87	0.048	-2.41656	7.8256	8.369	13.655	-0.18					-11.2721	-0.23	2.41744
1083	14.822	14.099	0.795	-0.299733	16.739	9.56	-0.08	10.18	-0.096	-1.91435	8.9001	7.666	14.0053	-0.35					-11.1021	0.09	2.99582
1082	14.056	13.933	-0.727	-0.0957718	16.175	9.285	-0.22	10.85	-0.434	-1.28688	9.5699	8.218	13.8139	-0.84					-10.953	-0.06	3.11631
1081	14.717	14.177	0.149	0.172357	16.373	8.967	0.14	11.16	0.057	-1.76973	9.4656	7.281	15.2703	-0.06					-10.8212	0	2.85122
1080	15.065	14.968	-3.389	0.289221	16.191	9.258	0.37	11.15	-0.493	-1.11606	8.806	7.226	15.9276	-0.16					-10.7035	-0.03	4.61045
1079	14.736	13.891	-1.646	-0.25652	17.357	9.429	0.26	11.58	-1.014	-2.00432	8.186	8.013	15.1419	-0.04					-10.5964	-0.15	3.3332
1078	14.649	13.965	-0.101	0.0204908	16.397	9.267	-0.09	10.76	-0.766	-2.43819	8.172	7.675	14.7289	-0.9					-10.4964	-0.08	3.74289
1077	14.654	14.278	-3.283	-0.0707873	16.583	9.418	-0.4	10.12	-0.861	-2.2446	8.0599	8.439	13.4823	-1.22					-10.399	0.09	2.41744
1076	14.413	14.052	-0.68	-0.457893	15.841	9.934	0.37	11	-0.92	-1.91094	8.6597	7.867	12.1255	0.16					-10.3029	0.01	2.34515
1075	14.869	14.462	0.024	-0.238351	16.323	9.971	0.37	10.41	-1.521	-2.68702	8.0793	7.124	15.3159	-1.17					-10.2094	-0.22	2.63433
1074	15.228	14.439	-0.881	-0.389912	16.632	9.947	0.01	10.51	-1.302	-1.6809	7.9561	7.144	12.5565	0.9					-10.1199	0.13	3.88748
1073	14.92	14.513	1.82	-0.294955	16.451	10.183	-0.47	10.64	-0.885	-1.82268	8.0174	7.183	13.6606	0.09					-10.0357	0.2	3.3814
1072	15.002	14.347	-3.411	0.104884	16.29	10.024	-0.6	10.85	-1.392	-0.591084	7.7616	7.402	15.4162	-0.94					-9.9582	0.06	2.56204
1071	15.142	14.982	0.055	0.148338	13.193	10.455	0.2	11.3	-0.935	-0.797204	7.5805	7.114	13.6823	-1.26					-9.8889	-0.17	3.4778
1070	15.319	14.6	-0.088	-0.12501	15.813	10.098	-0.14	10.83	-0.905	-1.78055	7.2944	7.288	15.3469	-0.94					-9.8291	0.2	3.16451
1069	14.99	14.444	-0.591	-0.193073	15.405	9.862	-0.56	10.21	-0.95	-0.727168	7.3574	7.076	14.8143	-0.81					-9.7802	0.2	1.98366
1068	14.679	13.97	-1.345	-0.0616863	14.968	10.015	-0.85	10.12	-0.032	-0.455568	7.5521	7.083	14.9715	-0.98					-9.7436	0.03	3.21271
1067	15.056	14.471	-0.392	-0.307783	15.714	10.064	-0.25	10.35	-0.077	-1.13713	7.0344	6.971	13.6765	-0.77					-9.7206	-0.02	4.17667
1066	14.708	14.802	-0.247	0.355584	16.525	10.699	0.29	10.79	-0.776	-1.62282	7.8508	6.875	13.7607	-1.27					-9.7126	-0.04	3.4055
1065	14.507	14.595	-3.002	-0.0456096	15.78	10.34	0.57	10.58	0.345	-1.98268	7.5277	6.768	13.9587	-0.61					-9.8782	0.24	2.22465
1064	14.437	14.425	0.725	-0.167015	16.373	10.284	0.21	11.05	0.445	-2.11079	6.8878	7.281	12.2593	-0.15					-10.1858	0.21	2.39334
1063	14.759	14.122	-1.135	-0.449324	16.583	10.593	0.05	10.44	0.048	-0.555212	7.436	7.714	15.0511	-0.88					-10.3514	0.2	2.82713
1062	14.953	15.102	-1.145	0.189095	15.693	11.678	0.73	11.99	0.043	-0.985103	8.4525	7.475	14.0106	-0.27					-10.2602	0.17	3.16451
1061	14.85	14.416	1.314	-0.297089	16.01	11.153	1.03	11.66	0.196	-1.27094	8.536	7.605	14.4409	-0.55					-10.0613	0.21	3.21271
1060	14.637	14.177	0.517	0.0581066	15.331	10.195	1	10.89	0.846	-1.0335	8.1486	7.669	14.6063	-0.26					-9.8666	0.15	3.21271
1059	14.224	13.776	-1.353	-0.224127	16.257	10.97	0.1	10.61	0.072	-1.53514	7.5856	7.124	14.482	0.57					-9.7208	0.28	2.51384
1058	14.469	13.868	0.113	-0.1688	16.22	11.038	1.07	11.46	-0.548	-1.92973	6.9656	7.083	12.9126	-0.43					-9.5789	0.15	2.36924
1057	14.628	13.629	1.178	-0.204042	16.027	10.727	-0.04	11.13	-0.603	-0.417419	8.1603	7.593	13.4826	0.16					-9.4181	0.06	3.14041
1056	14.374	13.036	0.978	-0.332872	14.511	10.659	0.24	10.78	-1.029	-1.43378	9.1887	7.582	12.3129	-0.42					-9.1607	0.13	4.22487
1055	14.441	13.965	1.543	-1.03217	14.939	10.123	-0.02	11.07	-0.369	-0.882043	8.9714	7.459	14.3082	-0.37					-8.9922	0	3.5501
1054	15.275	13.845	-0.294	-0.330515	15.158	9.778	0.39	10.74	-0.687	-1.45827	8.7547	7.322	13.1374	-0.16					-9.1837	0.07	2.44154
1053	14.929	13.947	0.751	-0.302207	15.948	9.674	-0.37	10.05	-0.434	-0.739126	8.16	7.573	14.1825	-0.49					-9.5695	0.11	3.91158
1052	15.366	14.269	0.064	-0.189644	16.517	10.671	0.42	11.43	0.335	-0.562614	8.2731	6.866	11.9467	0.01					-9.8666	0.09	4.32126
1051	15.301	13.303	-5.271	-0.33996	16.068	10.399	1.51	11.58	0.062	0.353539	8.6954	6.987	13.3702	-0.26					-9.9889	0.23	4.75505
1050	15.315	13.625	-1.653	-0.185238	15.631	9.984	0.68	10.32	1.462	-0.404323	9.6326	7.153	13.7406	0.08					-10.0782	0.17	3.91158
1049	15.051	13.638	-0.065	-0.241365	17.616	9.93	0.87	10.37	1.144	0.0688426	8.3238	7.345	14.3465	-0.2					-10.1928	0	4.32126
1048	15.34	14.296	0.729	-0.258189	16.43	10.333	0.86	10.77	0.678	-0.379839	9.0228	6.494	12.7983	0.57					-10.3874	0.15	2.24875
1047	15.137	14.209	-1.562	-0.538734	16.249	10.027	-0.57	9.91	1.08	-1.41499	9.248	6.845	13.5781	-0.29					-10.635	-0.02	3.5742
1046	14.623	13.473	0.477	-0.24435	15.965	9.617	-0.05	10.1	0.598	-2.59193	8.5108	6.471	14.4623	0.75					-10.8725	-0.02	2.63433
1045	15.364	14.375	-1.616	-0.485058	15.462	10.467	0.64	10.45	0.251	-0.501689	8.7837	6.378	13.6347	0.71					-11.1202	0.15	2.97172
1044	14.955	15.235	0.4	-0.269723	15.883	10.668	-0.17	10.44	0.554	-1.12517	8.195	6.558	13.1469	0.37					-11.359	0.13	2.12825
1043	14.878	15.134	0.566	-0.130036	15.219	10.56	-0.44	10.73	-0.796	-1.23564	8.2749	7.981	12.8831	-0.04					-11.466	0.17	2.46564
1042	14.577	15.391	-1.83	-0.0117447	14.873	9.746	-0.02	9.81	-0.047	-0.927025	9.087	7.404	12.143	1.07					-11.4022	-0.03	2.73073
1041	14.775	14.057	0.417	-0.249013	15.957	9.673	-0.82	9.7	-0.245	-0.36902	9.0526	7.194	14.3163	0.02					-11.2396	0.1	3.74289
1040	15.773	14.664	-0.714	-0.38579	16.311	10.091	-0.05	10.62	-0.518	-0.929872	9.1832	7.267	12.9328	-0.33					-11.0215	0.05	3.4296
1039	15.116	13.606	0.113	-0.308322	16.62	10.143	0.34	10.72	0.191		8.6181	7.413	14.1074	-0.44					-10.7909	0.07	3.76699
1038	15.03	13.28	0.844	-0.144058	16.076	10.075	0.12	10.29	0.315		8.7959	7.632	13.4591	-0.09					-10.5454	-0.01	2.32105
1037	15.593	14.637	-2.106	-0.0276957	15.1	10.801	0.52	11.28	0.846		7.8605	7.263	13.8207	-0.76					-10.2397	-0.01	2.61023
1036	15.387	13.758	-1.959	-0.117512	16.142	10.54	-0.32	10.69	0.216		8.1569	7.384	14.4745	-0.5					-9.853	0.12	2.05596
1035	15.002	14.375	-0.677	0.0472902	15.977	10.381	0.93	10.37	0.147		9.343	7.203	13.2953	-0.02					-9.108	0.24	2.32105
1034	15.186	14.145	0.762	-0.788279	16.266	10.165	0.28	11.18	0.311		8.9618	7.5	13.1648	0.52					-8.1792	0.17	4.10437
1033	15.013	13.712	1.337	-0.350035	15.64	10.05	-0.85	10.92	0.524		9.7258	7.897	12.4018	0.27					-7.7236	0.11	2.00776
1032	15.838	14.025	-0.789	-0.329152	14.449	9.849	-0.16	9.98	-0.007		9.2822	7.523	12.4424	-1.48					-7.7909	-0.13	2.65843
1031	15.245	13.928	0.535	-0.57309	14.964	10.789	-0.45	10.82	1.149		9.0805	8.147	11.4635	-0.06					-7.9783	-0.05	1.83907
1030	14.733	13.928	-0.217	-0.179425	16.99	10.806	-0.6	11.46	0.251		8.1041	8.266	11.7666	-0.05					-8.2637	0.17	3.18861
1029	15.301	13.257	0.646	-0.286637	16.068	9.933	0.13	10.84	-1.029		8.6589	7.735	11.555	-0.76					-8.6252	-0.01	2.36924
1028	15.446	14.319	0.032	-0.44556	17.11	10.095	0.42	10.96	0.653		9.1563	6.93	13.3962	0.61					-9.7186	-0.06	2.65843
1027	15.172	13.381	1.461	-0.0635372	16.789	10.957	0.05	11.17	-0.027		8.8645	6.392	11.6921	-0.33					-11.349	0.15	3.69469
1026	15.565	13.422	2.101	-0.729883	15.854	10.416	0.07	11.02	0.663		8.6789	6.435	14.2595	-0.09					-12.2181	0.09	2.05596
1025	15.436	14.099	-5.484	-0.541413	15.862	10.722	0.48	11.94	-0.146		7.552	6.305	13.8625	-0.59					-12.2664	0.15	2.00776
1024	15.102	13.873	1.566	-0.0931983	14.845	10.461	-0.63	11.03	0.092		7.8344	6.396	12.4642	0.17					-12.3003	0.3	2.17645
1023	15.469	13.625	0.749	-0.13197	15.714	9.821	0.25	9.84	0.038		7.3185	7.541	13.8105	0.31					-12.3203	0.18	5.18883
1022	15.448	14.296	1.463	-0.418056	16.393	10.686	-0.51	10.95	-0.077		7.3202	6.912	13.7943	-0.29					-12.3268	0	3.79109
1021	15.256	13.293	0.467	-0.495056	14.725	10.494	0.33	11.06	-1.456		6.5883	6.645	11.6532	0.58					-11.6712	0.2	2.56204
1020	14.834	13.477	1.005	-0.607682	15.121	10.586	0.08	11.64	-1.526		6.997	6.813	12.8263	0.5					-10.3199	0.13	2.05596
1019	14.479	13.091	-2.564	-0.104756	15.487	10.742	0.37	11.78	0.43		8.0461	7.187	13.847	0.14					-9.1961	-0.01	2.22465
1018	14.339	13.376	-1.856	-0.345697	16.611	10.064	0.65	10.84	-0.474		6.9441	8.366	13.5651	0.69					-8.5046	0.03	2.10416
1017	14.448	13.362	2.517	-0.718631	16.047	9.643	-0.41	9.73	-0.111		6.7629	7.862	13.1703	0.2					-7.8822	0.22	2.61023
1016	14.462	12.879	1.584	-0.181191	16.233	9.511	0.09	10.43	-0.935		7.4528	7.673	12.9113	0.35					-7.4002	-0.02	1.88726
1015	14.824	12.778	0.799	-0.34952	17.588	9.377	-0.16	9.64	-0.186		6.4831	7.431	14.4072	-0.06					-7.1301	0.1	1.83907
1014	14.901	13.629	-0.687	-0.505437	16.595	9.758	-0.45	10.38	-1.223		6.6202	7.149	13.9545	0.47					-7.0018	0.2	3.21271
1013	15.051	13.413	-2.156	-0.270414	16.735	9.92	-0.25	10.08	0.186		7.0323	6.688	13.772	-0.18					-6.9109	-0.07	2.56204
1012	15.537	14.319	-0.432	-0.269254	17.052	9.754	-0.96	10.34	-0.364		7.086	6.563	13.0461	-0.6					-6.8763	0.14	2.61023
1011	15.782	13.684	-2.699	-0.545622	16.929	10.087	0.03	10.79	-0.32		6.8588	6.383	14.1778	-0.46					-6.9064	0.08	2.77893
1010	15.282	14.241	-2.743	-0.308966	17.415	10.004	0.12	10.03	-0.022		7.7904	6.275	13.775	0.27					-6.989	-0.04	3.4778
1009	14.602	14.112	-0.628	-0.468883	16.509	9.933	0.02	9.92	0.226		7.7885	7.789	13.9534	0.15					-7.1127	-0.01	2.39334
1008	14.647	13.873	0.16	-0.354815	17.814	10.953	-1.15	10.01	0.752		7.3161	8.013	14.4261	-0.76					-7.266	0.14	2.44154
1007	14.427	13.036	-2.423	-0.415746	18.012	11.163	-0.2	11.11	-1.347		7.3194	8.122	12.144	-1.4					-7.6003	0.05	2.70663
1006	15.368	13.293	-2.693	-0.370656	16.261	11.287	0.08	11.18	-0.364		8.48	8.225	12.8738	-0.32					-8.116	-0.17	3.09221
1005	14.719	13.666	-1.922	-0.188979	17.32	11.23	0.25	11.17	0.454		7.6221	7.71	12.6114	-0.47					-8.5754	-0.07	3.81519
1004	14.701	14.14	-5.824	-0.223787	16.06	11.122	0.03	11.03	-0.895		7.026	8.029	12.7389	-0.88					-8.9017	0.18	2.56204
1003	14.974	13.542	-3.482	0.0745036	17.773	10.718	-0.57	10.95	0.4		8.0294	7.988	12.4776	-0.57					-9.1903	0.14	2.39334
1002	14.789	13.441	-5.324	0.289375	16.941	11.056	0	11.59	-0.23		7.5124	7.133	11.5592	-0.1					-9.4614	-0.19	2.70663
1001	14.95	13.919	-2.023	0.227829	15.99	10.966	-0.89	11.53	-0.091		7.3829	6.729	11.9491	-0.8					-9.7352	-0.12	2.17645
1000	14.771	12.778	-0.264	-0.00775407	14.849	11.543	0.51	12.36	-0.593		7.973	7.224	13.3363	-0.05					-10.0651	0.22	4.05617
999	14.941	13.809	-1.272		15.64	11.001	0.04	11.36	-0.037		7.1615	7.897	11.289	-0.62					-10.4244	0.06	2.29695
998	15.095	13.905	2.176		17.316	10.998	-0.62	11.38	-0.538		7.6799	7.981	12.0262	0.2					-10.7132	-0.09	2.92352
997	15.324	13.891	-1.216		17.575	11.135	-0.2	11.97	-0.171		7.2517	8.152	12.8581	-0.28					-10.8317	-0.1	2.20055
996	15.037	14.26	2.417		16.669	10.638	-0.35	11.18	-0.216		7.0222	7.776	13.0823	-1.1					-10.7411	-0.06	2.29695
995	15.368	13.661	3.371		16.747	10.598	0.23	11.82	-0.771		7.3023	7.906	13.9253	-0.7					-10.5417	-0.08	3.3573
994	15.579	14.223	-2.028		16.039	11.236	-0.69	12.01	-0.518		7.5979	7.641	13.2912	-0.3					-10.3424	-0.08	5.8154
993	15.726	14.637	1.21		16.883	9.957	-0.22	10.59	0.866		7.5751	7.698	12.7617	0.11					-10.2517	0.03	4.32126
992	15.569	15.805	0.294		16.224	10.537	-0.22	11.39	-0.469		6.4092	7.356	12.3541	-0.91					-10.2526	-0.07	4.46586
991	14.918	14.623	-2.295		16.912	10.316	-0.72	10.86	-0.191		7.2935	6.982	14.3322	-0.3					-10.2552	0.01	3.86338
990	14.764	14.816	1.685		16.99	11.089	0.12	12.1	-0.082		5.4471	7.24	13.9651	-0.96					-10.2594	-0.07	4.87554
989	14.764	16.229	1.294		15.804	10.545	-0.76	10.07	-0.464		7.3827	7.443	13.6344	-0.29					-10.2653	-0.1	4.22487
988	14.465	15.226	0.679		15.705	9.981	0.45	10.41	-0.067		8.174	7.986	13.1653	-0.82					-10.4613	0.06	3.71879
987	14.969	15.792	0.856		15.685	11.254	-0.21	11.36	-0.186		7.954	7.493	12.9163	-1.28					-10.9391	-0.18	2.92352
986	14.953	14.356	1.627		15.742	10.589	0.47	11.35	0.534		7.2701	8.161	13.1965	-0.55					-11.5534	-0.06	2.56204
985	15.354	14.338	-2.681		15.825	9.639	-0.01	9.73	0.688		6.2138	7.194	14.574	-2.08					-12.1592	0.23	2.99582
984	15.756	13.753	-0.004		14.869	10.226	0.28	10.17	0.544		8.8797	6.994	13.3173	-0.74					-12.7519	0.14	4.87554
983	15.088	15.824	-0.069		14.173	10.573	-0.15	10.73	0.375		8.4152	7.026	10.9689	-1.33					-13.4084	-0.03	3.06812
982	14.658	14.632	0.083		15.133	10.614	0.74	12	0.033		8.2347	6.604	11.96	-1.01					-14.1052	0.11	2.27285
981	14.953	15.336	-0.708		13.799	10.242	-0.63	10.26	-0.101		8.7454	7.171	11.338	-1.07					-14.8187	-0.2	2.32105
980	14.974	14.77	1.634		14.445	9.752	0.2	10.76	-0.091		8.7061	7.648	12.8012	-0.24					-15.7026	0.04	2.32105
979	15.107	15.778	0.181		13.551	9.722	-0.41	9.55	0.177		8.6436	8.36	11.8321	-0.54					-16.7185	0.02	3.69469
978	14.983	15.253	0.681		14.696	10.661	0.4	11.19	-0.538		9.1088	7.716	11.6041	-0.5					-17.556	-0.28	3.18861
977	15.114	14.319	0.355		14.466	10.226	0.23	11.03	-0.677		7.9042	8.036	13.3549	-0.35					-17.9042	-0.11	4.70685
976	15.441	15.009	-0.993		14.779	10.474	0.27	10.29	-0.756		8.5063	7.331	13.1947	-0.3					-17.8298	-0.01	2.87532
975	15.238	14.407	-0.84		14.264	10.659	-0.42	11.28	-0.384		8.6696	7.587	13.9341	-0.4					-17.6353	0.15	2.80303
974	14.96	14.126	-2.715		14.392	10.506	-0.55	10.24	-0.578		7.837	8.204	12.6983	-0.17					-17.3634	-0.26	3.5501
973	14.894	14.103	-2.612		14.647	10.588	-0.1	10.88	-0.786		8.7242	7.153	13.2506	-0.34					-17.0569	-0.05	3.09221
972	15.158	13.56	-5.544		14.375	11.174	0.71	11.43	-0.593		8.8311	6.647	13.2261	-0.04					-16.5978	0.19	1.91136
971	15.009	14.549	-2.158		14.672	10.536	-0.25	10.79	-0.603		8.6874	6.047	12.9469	0.31					-15.928	-0.15	2.53794
970	14.871	14.103	-0.487		14.808	11.04	0.01	10.21	0.097		6.5508	5.844	13.7917	0.04					-15.1801	0.03	4.27307
969	15.086	14.052	-0.701		14.898	10.986	0.28	10.61	-0.434		8.7404	6.585	12.4107	0.09					-14.4868	0.03	1.86317
968	14.962	14.724	0.818		15.261	9.814	-0.13	9.75	-0.305		6.794	8.964	13.2295	-0.13					-13.9805	0.11	1.93546
967	15.151	14.655	-1.624		14.42	10.113	-0.76	10.21	-0.742		8.5979	9.422	10.7687	-0.67					-13.6409	0.14	2.97172
966	15.621	14.559	-3.148		14.025	10.163	-0.14	9.8	0.226		9.1253	9.094	13.2265	-0.59					-13.3539	0.05	3.18861
965	15.691	14.848	2.318		13.362	9.635	-0.65	9.56	0.494		8.7038	9.24	11.9621	-0.51					-13.1117	0.08	2.29695
964	15.518	15.069	-1.69		13.465	9.926	-0.34	10.04	0.206		8.3492	9.069	12.453	-0.32					-12.9068	0	2.34515
963	15.422	14.439	0.091		14.021	9.99	0.12	10.04	-0.617		9.0481	8.638	10.5151	0.04					-12.7352	0.05	2.10416
962	15.359	14.738	-2.051		13.757	8.973	-0.15	9.95	-1.034		7.9012	9.199	12.8247	-0.54					-12.5901	0.05	3.5742
961	14.992	14.513	0.002		14.536	8.816	-1.13	8.84	-0.513		8.693	8.597	11.718	-0.33					-12.4592	0.05	2.80303
960	14.857	14.807	-0.816		13.547	10.146	-0.05	10.53	0.454		7.6499	8.423	12.5195	-0.42					-12.3302	-0.04	3.16451
959	14.658	13.753	-1.934		13.37	10.011	-0.21	10.41	-0.34		7.0154	8.166	12.3332	-1.13					-12.1909	0.03	2.92352
958	14.74	13.942	-3.13		14.635	9.702	-0.52	9.38	-0.196		7.5337	8.031	11.2518	0.09					-12.011	0.19	3.93568
957	14.752	13.786	0.291		14.552	9.671	-0.23	10.09	-0.161		8.0156	9.452	11.8171	-0.71					-11.8085	-0.18	3.98388
956	15.116	13.054	-3.479		14.276	8.975	0.15	9.25	0.623		8.4345	9.47	11.2776	-0.32					-11.6431	-0.08	2.56204
955	15.294	13.993	-1.69		15.755	9.871	0.04	10.07	-0.419		7.6946	8.629	12.3888	-1.33					-11.5747	-0.13	3.5742
954	15.681	15.051	0.93		15.553	9.726	-0.36	10.34	-0.657		7.6694	7.65	11.1305	-0.58					-11.6185	0.02	2.97172
953	15.273	15.327	0.264		14.429	9.503	-0.66	10.63	0.043		8.083	6.871	12.265	-0.57					-11.723	0.08	4.44176
952	15.224	15.58	-0.902		15.817	9.55	-0.52	10.14	0.023		8.4088	6.827	12.8941	-1.26					-11.8478	-0.14	3.98388
951	15.565	15.157	-2.206		14.235	9.795	0.1	11.22	0.39		9.0292	7.217	13.0464	-1.11					-11.9523	-0.07	2.70663
950	15.861	14.913	-0.455		15.747	9.293	-0.41	10.13	0.221		7.9089	8.065	12.4331	-0.7					-11.9961	-0.3	2.82713
949	15.969	15.41	1.126		15.388	9.743	-0.02	10.33	0.167		8.992	9.117	13.6048						-11.8779	-0.18	4.82734
948	15.927	15.056	-0.219		14.486	9.566	-0.26	9.74	-0.086		8.3599	8.893	13.0944						-11.5857	0.17	2.56204
947	15.896	14.871	-1.037		15.285	9.658	0.11	10.39	-0.831		8.9845	8.175	13.1066						-11.213	-0.11	3.79109
946	15.857	14.287	-0.99		14.865	10.072	0.32	10.6	-0.876		8.1484	8.576	12.3267						-10.8535	-0.12	2.32105
945	15.38	14.402	1.577		14.379	10.2	0.14	10.8	-1.019		7.4358	8.804	11.468						-10.6006	-0.08	3.14041
944	15.163	14.687	0.019		14.285	9.656	-0.14	10.41	-1.952		8.1605	9.098	12.4864						-10.4498	-0.05	4.05617
943	14.694	13.997	-1.311		13.37	9.673	-0.41	10.09	-1.243		8.2416	8.647	11.8004						-10.3262	-0.2	2.73073
942	14.563	14.756	-0.805		13.469	10.305	-0.14	10.64	-1.278		7.3821	7.491	13.4499						-10.2177	0.1	2.51384
941	14.934	15.447	0.724		15.104	9.482	0.27	9.57	-0.245		8.6993	7.4	13.4197						-10.1123	-0.24	2.32105
940	15.149	15.06	-4.793		15.866	10.707	-0.33	10.26	-1.575		7.3979	6.77	12.8241						-9.998	-0.15	2.00776
939	15.319	15.249	1.518		14.931	11.158	0.64	11.3	-1.357		7.772	7.748	13.2635						-9.8778	-0.05	3.18861
938	15.976	15.042	-1.151		14.63	11.143	-0.24	10.55	-0.642		8.5593	8.088	13.4485						-9.7596	-0.11	4.15257
937	16.352	15.695	1.204		15.479	10.734	-0.18	10.93	-0.454		8.019	8.341	12.5399						-9.6389	-0.11	2.82713
936	15.913	15.621	2.158		15.413	11.577	0.16	11.26	0.018		8.8289	8.216	11.8897						-9.5115	-0.17	2.22465
935	15.495	14.848	1.063		13.799	11.95	0.4	12.13	-0.662		8.4155	8.02	14.0465						-9.3728	0.31	2.03186
934	15.7	15.557	-0.128		14.997	11.849	0.6	11.95	-0.032		8.0026	7.415	11.6033						-9.2147	-0.21	2.27285
933	15.378	14.816	0.34		15.821	10.99	0.2	11.82	-0.414		8.149	8.052	13.0595						-9.0386	-0.16	4.00798
932	15.03	15.203	-4.515		15.981	10.786	-0.09	11.34	0.003		8.2648	8.309	12.8668						-8.8541	0.03	3.11631
931	15.371	13.983	-0.397		16.451	11.278	0.2	11.43	-0.672		8.3274	8.054	12.6018						-8.6708	-0.13	2.17645
930	15.156	15.433	-2.761			10.401	0.13	11.33	-0.662		7.8958	8.341	14.1111						-8.4983	-0.08	4.39356
929	14.789	14.568	-1.378			10.332	0.04	11.18	0.489		8.0058	8.444	14.1985						-8.3317	-0.27	3.21271
928	14.957	14.246	-0.799			10.549	0.31	11.5	0.112		9.2778	7.639	12.8783						-8.164	-0.15	3.11631
927	15.186	14.605	-0.35			10.055	-0.25	9.96	-0.23		7.4301	7.997	12.7						-8.0028	-0.03	2.61023
926	14.99	14.485	-0.294			9.499	-0.01	10.4	-0.503		7.8059	7.673	12.6533						-7.855	-0.37	2.75483
925	15.175	14.986	-2.965			10.311	-0.93	10.77	-0.796		7.8676	7.577	11.2726						-7.7281	-0.08	1.91136
924	15.035	14.448	0.283			9.766	-0.07	11.07	-0.608		8.2017	7.555	13.2749						-7.608	-0.12	2.32105
923	14.981	14.549	0.904			9.878	-1.3	10.67	-0.637		7.5819	7.322	13.3319						-7.4865	-0.14	2.32105
922	14.813	14.885	1.055			9.633	-0.37	10.98	-0.692		7.559	6.743	13.3718						-7.3797	-0.27	3.3573
921	14.92	14.108	-1.224			9.582	-1.09	10.3	-1.029		8.2526	6.791	13.7479						-7.3039	-0.05	3.95978
920	14.803	14.122	-1.356			9.774	-0.48	11.16	-0.975		6.8438	7.244	14.1388						-7.275	-0.09	2.22465
919	14.946	13.956	-1.402			10.168	-0.88	11.4	-0.474		5.9576	7.867	14.3282						-7.3066	-0.15	2.58614
918	14.955	13.914	-0.416			9.695	-1.09	10.45	-0.866		7.3582	7.885	13.8235						-7.3819	-0.15	2.46564
917	15.352	13.956	-0.17			10.048	-0.94	10.56	0.072		6.6287	7.609	14.2824						-7.4717	-0.15	1.88726
916	15.558	13.454	-2.663			9.239	-0.78	10.98	0.479		6.6978	7.34	12.5195						-7.547	-0.15	3.83928
915	15.126	14.273	-2.615			9.131	-1.11	11.06	-0.191		6.87	8.093	13.6048						-7.5786	0.04	2.36924
914	15.263	13.215	-4.633			9.107	-0.37	9.84	0.018		6.2254	7.869	14.4164						-7.5405	0.14	2.41744
913	14.696	14.398	-1.355			9.329	-0.86	10.38	-0.374		6.5304	7.413	13.6048						-7.4405	0.05	2.27285
912	14.574	14.14	-4.259			9.81	-0.4	11.71	-0.389		6.8029	7.443	13.8235						-7.2997	-0.11	2.53794
911	14.362	13.878	0.226			9.216	-0.59	10.08	-1.109		5.1546	7.878	14.7485						-7.1393	-0.24	3.11631
910	14.374	13.381	-0.052			9.407	-0.86	10.32	-1.888		6.6908	7.356	14.6206						-6.9806	-0.17	3.3332
909	14.558	13.063	-3.06			9.497	-0.81	10.83	-1.094		6.7433	6.896							-6.8446	-0.21	2.48974
908	14.794	13.464	-3.28			9.439	-0.88	10.55	-0.811		6.6899	7.085							-6.7105	-0.16	2.70663
907	14.845	13.855	-4.201			9.519	-1.49	10.09	-1.555		6.5825	7.637							-6.5607	-0.22	2.75483
906	14.661	13.123	-1.895			9.588	-1.02	10.5	-0.9		6.1635	7.035							-6.4212	-0.25	2.94762
905	14.682	13.85	-2.761			9.877	-0.78	10.43	-0.498		6.2581	7.349							-6.3184	-0.16	2.87532
904	14.626	13.611	-3.622			10.016	-1.15	10.43	-0.712		6.5638	7.201							-6.2783	-0.28	3.21271
903	15.14	13.427	-5.277			9.878	-1.47	10.38	-0.424		6.9158	6.747							-6.3569	-0.18	4.73095
902	14.922	13.413	-0.478			9.82	-1.1	10.01	-0.469		7.2755	7.171							-6.5582	-0.24	2.53794
901	14.992	14.6	-3.733			10.209	-0.31	10.72	-0.22		7.2942	7.028							-6.8305	-0.18	3.06812
900	14.978	14.006	-1.884			10.203	-1.45	10.06	-0.31		6.8772	6.918							-7.1221	-0.26	2.58614
899	14.969		-0.506			10.915	0.08	11.35	-0.88		7.5963	7.112							-7.3812	-0.09	2.41744
898	15.013		1.204			10.265	-0.6	10.2	-0.608		7.0986	6.845							-7.5559	-0.15	2.36924
897	15.256		0.465			10.381	-0.6	11.38	-0.216		7.2066	6.77							-7.6717	0.28	2.53794
896	14.925		1.181			9.956	-0.92	10.68	-1.62		7.6931	7.379							-7.781	-0.19	2.65843
895	14.644		0.558			10.294	-0.61	11.12	-0.766		8.3625	8.72							-7.8726	-0.13	2.51384
894	14.567		0.929			9.891	-0.29	11.35	-0.31		8.9617	8.891							-7.9357	-0.09	2.87532
893	14.99		1.458			9.669	-0.32	10.91	-0.513		6.2475	8.526							-7.9592	-0.01	2.87532
892	15.102		0.059			10.115	0.9	10.82	0.196		7.0354	8.173							-7.9506	-0.12	2.63433
891	14.88		-0.901			10.656	0.69	12.25	0.177		6.745	7.229							-7.9276	-0.3	2.03186
890	14.773		0.694			10.609	1.39	11.32	0.052		7.165	6.77							-7.8946	0.24	3.67059
889	15.163		-0.843			9.775	0.06	10.35	0.405		6.9968	6.946							-7.8558	0.31	2.87532
888	15.338		-3.059			10.548	0.54	10.98	0.172		7.0966	6.519							-7.8155	-0.01	3.83928
887	15.025		0.185			11.126	0.52	12.14	0.107		7.5899	6.768							-7.7779	-0.29	3.5742
886	14.383		1.004			9.959	0.7	11.59	0.618		7.0709	8.027							-7.7357	-0.18	3.04402
885	14.497		-0.134			10.5	0.71	12.54	0.37		6.459	7.999							-7.6837	-0.06	3.18861
884	14.661		-6.295			10.463	0.19	11.57	-0.573		6.8219	7.386							-7.6296	0.2	2.10416
883	14.925		0.174			10.702	1.06	11.75	0.311		7.7883	7.951							-7.5813	-0.2	2.29695
882	14.778		1.31			9.449	0.6	11.19	0.583		7.1279	8.604							-7.5466	0.12	3.18861
881	14.953		-4.565			10.223	0.08	10.38	0.529		6.8426	8.011							-7.5333	-0.01	1.98366
880	15.688		-1.871			10.295	0.85	11.78	0.564		7.0184	7.39							-7.6298	0.15	1.76677
879	15.548		1.894			10.671	0.5	11.31	-0.027		7.2717	6.875							-7.8824	-0.18	1.81497
878	14.983		0.259			10.198	0.68	11.21	-0.275		8.6496	7.566							-8.235	-0.24	2.29695
877	15.072		2.145			10.722	0.26	11.11	-1.114		8.4328	7.559							-8.6321	-0.1	2.39334
876	14.708		-0.117			10.551	0.99	11.67	-0.151		8.0198	8.079							-9.0179	-0.35	2.92352
875	14.588		-1.147			10.251	0.09	10.92	0.42		8.1687	7.803							-9.3365	-0.02	2.44154
874	14.289		-0.074			10.541	-0.21	11	-0.077		7.6811	8.134							-9.628	-0.07	3.526
873	14.53		-1.478			9.639	0.6	10.65	-0.171		6.6496	8.198							-9.9458	-0.18	3.5742
872	15.294		-1.354			10.447	0.51	10.85	-0.474		7.1376	7.815							-10.2545	0.07	2.36924
871	15.233		-3.001			9.829	0.57	11.26	-0.662		7.191	7.564							-10.5189	-0.04	3.69469
870	15.037		-1.213			9.676	0.7	10.3	-0.672		7.1311	7.233							-10.7034	-0.05	2.70663
869	14.843		-0.543			9.962	1.39	11	-0.002		6.4367	6.672							-10.7728	-0.41	3.95978
868	14.808		-3.865			9.509	0.56	10.19	-0.528		7.3268	6.859							-10.6872	-0.19	3.4537
867	14.946		-3.749			9.079	-0.02	9.92	-0.464		7.2837	6.497							-10.4666	-0.03	3.526
866	14.549		-1.392			9.086	1.11	9.49	-1.029		7.6311	6.294							-10.1651	-0.25	3.23681
865	14.493		-1.899			8.666	-0.05	8.65	-1.005		8.2713	6.503							-9.8371	-0.06	2.24875
864	14.343		-1.448			8.865	0.2	9.91	-0.598		8.829	6.136							-9.5368	-0.36	2.10416
863	14.203		-0.134			8.882	0.57	10.07	-0.975		8.6974	6.827							-9.3184	-0.12	5.30932
862	14.079		0.849			8.908	0.06	9.49	-0.786		8.164	7.338							-9.1738	-0.23	1.81497
861	14.427		-0.642			9.12	0.11	9.56	-1.039		7.8341	7.696							-9.0529	0.02	4.70685
860	14.133		-1.674			9.328	0.06	10.24	-1.019		7.7519	7.764							-8.947	0.03	2.17645
859	13.953		-1.274			8.974	0.02	9.85	-0.935		8.4143	7.933							-8.8474	-0.05	2.99582
858	14.212		1.339			8.923	-0.15	9.35	-0.027		8.2054	7.81							-8.7452	-0.05	2.53794
857	14.047		-0.329			9.798	-0.29	10.48	-0.598		7.6972	7.694							-8.6318	-0.23	2.99582
856	14.327		-1.819			9.217	-0.25	10.1	-0.434		7.265	6.2							-8.4983	0.04	3.3573
855	14.708		-1.162			9.411	0.22	10.96	-0.811		8.094	6.9							-8.3115	0.1	4.08027
854	15.296		-3.147			8.979	-0.18	10.02	-0.345		6.6112	6.383							-8.0699	-0.3	2.77893
853	14.985		-2.078			9.201	-0.89	9.77	-0.275		8.2059	6.321							-7.8132	0.07	3.76699
852	14.46		-2.534			8.494	0.24	9.35	-0.558		8.1934	6.889							-7.5808	-0.03	4.61045
851	14.633		-0.289			8.64	0.24	9.33	0.375		7.9241	6.674							-7.4124	-0.07	2.00776
850	14.621		-0.968			9.522	0.74	10.52	0.062		9.2492	7.488							-7.3475	0.1	2.05596
849	14.507		-0.091			10.023		10.7	-0.568		8.6681	7.039							-7.366	0.02	2.10416
848	14.738		-0.329			8.945		9.75	0.013		8.4636	8.225							-7.4153	-0.14	2.17645
847	15.046		0.208			9.482		9.85	-0.275		7.8489	7.461							-7.4865	0.2	2.56204
846	14.649		-2.968			10.682		10.78	-0.186		8.4863	7.628							-7.5705	-0.08	2.03186
845	14.969		-1.412			10.838		11.89	-0.106		9.9966	7.194							-7.6584	-0.13	2.73073
844	14.579		-0.143			10.294		10.59	0.286		7.5328	7.842							-7.7411	0.03	3.30911
843	14.803		0.258			10.069		11.27	-0.513		9.6761	7.769							-7.8097	0	5.71901
842	14.906		-3.59			10.259		10.9	0.504		7.8412	8.061							-7.8729	-0.1	5.02013
841	14.708		0.959			10.403		10.63	-0.186		8.1853	7.523							-7.9421	0	2.82713
840	14.712		1.696			10.449		10.55	0.072		8.443	7.055							-8.0114	0.12	2.65843
839	14.6		0.935			10.415		11.21	-0.201		8.4649	6.636							-8.0752	0.11	3.74289
838	14.065		1.421			9.472		10.47	-1.282		7.737	6.54							-8.1278	-0.01	2.22465
837	14.219		-0.184			10.217		11.64	-0.851		8.0816	6.886							-8.1635	0	3.3573
836	14.488		0.41			10.16		10.79	-0.558		8.2856	6.761							-8.1767	*	2.75483
835	14.922		0.903			9.887		11.09	-0.856		8.09	6.893							-8.1304	0.15	2.63433
834	15.063		0.803			10.238		10.84	-1.039		9.7189	8.07							-8.005	0.16	2.39334
833	15.513		-1.526			9.909		11.56	-1.074		9.5622	8.79							-7.8207	-0.18	2.94762
832	15.74		-2.35			9.829		11.11	-1.694		9.6523	7.634							-7.5977	-0.21	2.87532
831	15.609		-1.932			9.789		10.71	-1.387		9.2102	7.534							-7.3562	-0.13	2.63433
830	15.784		-2.479			10.059		11.06	-1.689		9.1758	6.798							-7.1165	0.07	2.24875
829	15.38		-2.203			9.406		10.43	-2.22		9.1191	7.213							-6.8113	0.13	3.64649
828	15.154		0.694			9.5		10.51	-1.55		9.8377	6.804							-6.3981	*	2.56204
827	15.051		-3.206			9.757		11.69	-2.473		8.8506	6.341							-5.9332	-0.12	2.29695
826	14.901		-2.359			9.572		11.14	-1.729		9.3336	6.912							-5.4732	-0.14	2.05596
825	14.712		-0.408			9.489		10.87	-1.342		9.236	6.839							-5.0746	*	1.93546
824	14.74		2.266			8.382		9.26	-1.109		8.7344	6.756							-4.7941	0.04	2.24875
823	14.918		0.399			9.385		10.26	-1.144		8.813	7.484							-4.688	0.18	4.99604
822	14.647		0.977			9.537		10.26	-1.402		7.9804	8.861							-4.721	-0.01	2.53794
821	14.479		1.103			9.499		10.39	-1.178		8.7775	7.646							-4.8068	*	2.63433
820	15.086		-0.714			9.254		10.41	-0.469		8.2117	7.669							-4.9258	*	4.92374
819	15.058		-1.504			8.814		9.21	-0.459		8.8818	8.161							-5.0583	*	2.63433
818	15.023		-4.549			8.822		9.08	-0.196		8.8389	7.516							-5.1847	0.2	2.58614
817	14.507		-4.188			8.907		9.16	0.117		9.0527	7.591							-5.2853	-0.28	2.39334
816	14.773		-5.339			9.182		9.97	-0.915		7.6916	7.149							-5.3404	*	3.09221
815	15.095		-3.718			8.587		9.1	-1.014		8.0556	7.532							-5.3653	*	2.39334
814	15.217		-4.812			8.916		9.47	-0.449		8.3616	7.311							-5.3879	-0.06	2.24875
813	14.978		-3.474			8.715		9.87	0.177		7.5042	8.061							-5.408	0.06	2.51384
812	14.628		-1.592			8.463		9.33	0.102		8.2174	7.358							-5.4252	0.07	2.70663
811	14.796		-1.561			8.984		9.92	-0.523		8.1271	8.298							-5.4391	-0.14	1.93546
810	14.532		-3.997			8.732		9.48	-0.384		8.3074	7.685							-5.4495	-0.2	3.23681
809	14.834		0.112			8.383		9.08	-1.352		8.2103	8.036							-5.456	-0.09	2.29695
808	13.902		0.624			9.052		9.37	-0.915		9.5301	8.435							-5.4582	-0.08	2.48974
807	14.355		-2.336			8.639		9.13	-1.57		8.3197	7.976							-5.4369	-0.03	3.3814
806	14.71		-2.961			8.624		9.28	-0.791		8.9001	7.872							-5.3819	-0.17	5.04423
805	15.154		0.173			8.609		9.16	-1.148		7.86	7.653							-5.3066	-0.09	3.09221
804	14.637		-2.483			8.179		8.87	-0.722		8.0817	7.153							-5.2247	-0.15	2.80303
803	14.679		-2.122			8.412		9.14	-1.6		7.0421	7.133							-5.1494	-0.04	2.22465
802	14.593		-1.727			8.588		9.52	-0.588		8.8306	7.062							-5.0944	-0.12	2.65843
801	14.719		-3.054			8.939		10.17	-1.034		8.463	7.427							-5.0731	-0.05	3.18861
800	14.747		-3.576			8.439		8.62	-1.62		9.0826	7.685							-5.1356	-0.04	5.96
799	15.02		0.149			9.355			-1.287										-5.3003	-0.09	2.61023
798	15.154		-0.095			8.92			-1.029										-5.5333	0.07	2.10416
797	14.913		-2.133			9.494			-0.503										-5.8003	0.04	3.62239
796	14.549		-0.917			9.265			-0.811										-6.0673	-0.08	2.56204
795	14.908		0.09			9.587			0.038										-6.3002	-0.35	2.03186
794	15.03		-0.481			9.645			-0.737										-6.465	0	2.08006
793	14.887		-0.079			9.894			-0.042										-6.5275	-0.26	2.27285
792	14.934		1.451			9.641			-0.196										-6.5133	0.31	2.17645
791	14.948		-4.85			9.85			-0.315										-6.4749	0.13	2.36924
790	14.999		1.298			9.983			-0.672										-6.4182	-0.24	3.16451
789	15.172		-1.171			9.029			0.112										-6.3489	-0.27	2.08006
788	15.1		-0.533			9.475			-0.211										-6.2731	-0.23	3.28501
787	15.698		-0.913			9.974			-0.027										-6.1966	-0.17	2.56204
786	15.541		0.719			10.228			-0.345										-6.1254	-0.18	4.36946
785	15.766		-0.514			10.208			-1.148										-6.0653	-0.16	2.10416
784	15.343		-2.012			10.2			-1.461										-6.0099	-0.12	2.75483
783	15.046		-0.815			9.581			-0.677										-5.9505	-0.12	2.51384
782	14.563		-0.416			10.211			-0.181										-5.8903	0.11	2.70663
781	14.985		-0.239			10.028			-0.429										-5.8322	0.35	4.97194
780	15.042		-0.41			10.412			-1.059										-5.7791	-0.18	4.12847
779	14.859		-2.302			10.394			-1.436										-5.7341	-0.26	2.65843
778	14.983		0.435			9.984			-0.151										-5.7001	-0.22	3.21271
777	15.044		-2.393			9.906			-0.235										-5.6802	-0.03	1.93546
776	15.277		-0.326			9.109			-0.444										-5.6688	-0.12	3.06812
775	15.301		-2.562			9.78			-0.354										-5.6583	-0.26	2.41744
774	15.142		-2.235			9.195			-1.005										-5.6491	0.23	2.56204
773	15.02		-3.816			9.706			-1.124										-5.6411	-0.17	1.79087
772	15.13		-4.445			10.181			-0.801										-5.6347	-0.22	4.12847
771	15.027		-3.176			10.372			0.673										-5.6299	-0.23	3.3814
770	14.574		-1.974			9.618			1.124										-5.6269	-0.14	2.51384
769	14.927		-0.104			9.735			1.373										-5.6258	-0.07	2.89942
768	14.635		0.233			10.959			0.39											-0.05	2.12825
767	14.857		0.466			10.301			0.082											0.11	2.85122
766	14.493		-1.977			9.981			0.435											-0.07	2.41744
765	14.759		0.988			10.511			0.226											0.04	2.12825
764	14.743		0.988			10.705			1.08											-0.1	1.88726
763	15.006		-2.795			10.884			0.266											0.17	2.00776
762	14.976		-0.41			10.294			0.593											0.06	1.95956
761	14.679		-2.503			11.72			0.35											-0.23	2.15235
760	14.374		-2.401			10.894			0.127											0.19	1.86317
759	14.409		-3.418			10.974			0.717											-0.15	1.86317
758	14.637		-0.183			11.141			0.137											-0.15	1.95956
757	15.497		-4.128			10.812			-1.282											-0.08	2.41744
756	15.179		0.612			10.45			-0.26											-0.07	2.48974
755	15.392		0.397			10.798			-0.766											-0.09	1.95956
754	15.284		-2.41			10.917			-1.039											0.12	2.08006
753	15.273		0.751			10.318			-0.682											0.05	2.24875
752	15.775		1.209			9.518			-1.387											-0.07	1.76677
751	15.467		-0.538			10.266			-1.228											-0.19
750	14.934		0.555			10.1			-0.255											-0.07
749	15.035		-0.268			10.211			-0.94											-0.06
748	15.049		-0.242			10.023			-0.335											0.08
747	15.371		-1.872			10.069			1.01											-0.29
746	15.99		-0.551			9.533			0.36											-0.2
745	15.544		-0.222			9.185			0.772											-0.29
744	14.943		-3.67			8.798			-0.166											0.06
743	15.595		-2.011			10.004			0.152											0.03
742	15.371		-1.242			9.389			1.015											0.19
741	15.506		-1.298			9.027			0.147											0.06
740	15.418		0.654			9.794			-0.211											0.21
739	15.193		0.006			9.905			-0.796											-0.14
738	15.558		-0.692			9.686			-0.895											-0.14
737	15.488		0.72			10.562			-0.662											-0.26
736	15.593		1.297			9.891			0.137											-0.26
735	15.868		1.048			10.032			0.082											-0.19
734	16.02		-0.063			10.514			-0.191											0.15
733	15.49		1.25			10.552			-0.012											-0.41
732	15.397		2.101			10.032			0.549											-0.12
731	15.14		0.701			10.431			0.638											-0.01
730	14.572		1.248			10.564			-0.161											0.2
729	14.336		-1.614			10.96			-0.717											-0.36
728	14.231		0.684			10.626			0.588											-0.37
727	14.862		-0.599			10.548			0.107											-0.47
726	14.887		-0.855			10.647			-0.474											-0.43
725	15.291		-2.884			11.135			-0.206											-0.36
724	15.406		-0.064			10.101			-0.126											-0.21
723	15.354		-0.545			10.353			-0.181											-0.17
722	14.925		1.237			10.318			-0.245											-0.17
721	14.82		-0.483			10.09			-0.642											-0.17
720	14.53		-1.595			9.822			-0.33											-0.21
719	15.147		-2.967			9.509			-0.503											-0.21
718	15.527		-3.014			9.995			-0.637											-0.23
717	15.399		0.045			10.033			-0.364											-0.18
716	15.1		-2.165			10.105			-0.394											0.13
715	14.694		1.685			9.804			-0.662											0.01
714	15.28		1.688			10.023			-2.111											0.01
713	14.932		1.368			9.859			-1.148											-0.25
712	15.252		-0.19			9.218			-0.717											-0.12
711	15.443		1.224			9.914			-0.692											0.27
710	15.193		0.195			9.495			-0.201											-0.18
709	15.448		1.554			10.046			-0.349											-0.11
708	14.577		0.801			9.715			0.216											-0.19
707	14.57		-4.492			9.885			-0.816											-0.65
706	14.558		-1.994			9.238			0.698											-0.49
705	14.282		1.071			9.528			0.698											-0.17
704	14.28		1.833			9.49			-0.722											-0.24
703	14.374		1.465			10.003			0.395											-0.19
702	14.448		0.47			9.69			-0.037											-0.3
701	14.453		-0.68			10.181			0.464											0.03
700	14.518		-4.348			10.092			-1.114											-0.01
699	14.462		1.802			9.744			-0.866											-0.05
698	14.226		1.022			9.592			-0.657											-0.23
697	13.878		0.832			10.316			-1.079											-0.23
696	14.058		2.37			9.416			-0.429											0.09
695	13.871		-0.876			9.818			0.271											0.04
694	14.219		1.364			10.378			-0.786											0.04
693	14.453		-1.569			9.523			-0.702											0.1
692	14.549		0.177			9.333			-0.89											-0.17
691	14.535		-1.151			9.922			-0.761											-0.29
690	14.542		-0.923			9.843			-2.364											0.13
689	14.434		0.315			9.981			-1.158											-0.08
688	14.936		-1.472			9.405			-0.88											-0.08
687	14.897		-2.371			9.75			-0.652											0.02
686	14.773		0.625			10.416			-0.672											-0.07
685	14.488		1.11			8.566			1.119											-0.14
684	14.551		-4.112			11.004			0.995											-0.27
683	15.142		0.994			10.148			0.291											-0.27
682	15.553		-3.18			10.005			0.335											-0.26
681	16.041		-1.365			9.86			0.484											-0.27
680	15.922		-1.396			9.851			0.881											-0.36
679	15.485		-0.696			9.784			0.837											-0.31
678	15.941		-0.757			9.979			0.36											-0.21
677	15.439		2.076			9.684			1.184											-0.34
676	15.009		0.222			10.357			0.837											-0.23
675	15.42		-2.014			10.328			0.861											-0.33
674	15.688		1.985			9.989			1.328											-0.28
673	15.252		2.675			10.052			0.375											-0.28
672	15.588		-0.018			10.082			0.142											-0.33
671	16.039		-0.959			10.314			0.703											-0.22
670	15.95		-2.733			9.549			0.216											-0.21
669	15.688		0.088			9.267			0.668											-0.21
668	15.35		-1.049			9.629			-0.022											-0.21
667	15.338		0.301			10.174			-0.379											-0.21
666	14.595		1.644			10.131			0.42											-0.21
665	14.427		0.559			9.396			-0.042											-0.2
664	14.217		1.328			8.979			-1.139											0.14
663	13.923		-1.809			9.146			-1.173											-0.21
662	14.353		0.644			8.387			-1.084											-0.33
661	14.446		-3.283			9.043			-0.751											-0.08
660	14.892		-0.826			8.561			-0.836											0.09
659	14.602		0.078			9.444			-0.578											0.05
658	14.782		1.207			9.484			-0.667											-0.09
657	14.932		1.798			9.834			-0.186											-0.13
656	15.31		0.105			9.51			-0.027											-0.13
655	15.359		-1.249			8.938			-0.26											-0.1
654	15.777		0.963			9.731			-1.407											-0.07
653	14.815		0.088			9.219			-1.496											-0.07
652	15.329		-1.52			9.525			-0.558											-0.14
651	14.778		1.468			8.951			-0.627											0.05
650	15.193		-1.705			9.145			-0.89											-0.1
649	14.479		-0.229			9.633			-1.124											-0.15
648	14.388		-1.552			8.881			-1.134											0.04
647	14.479		-1.038			9.412			-0.389											0.07
646	15.016		-2.68			9.906			-0.811											-0.13
645	15.27		-0.981			10.48			-0.34											-0.05
644	15.184		-2.924			9.715			-0.737											-0.05
643	14.682		-0.349			9.485			-0.598											0.01
642	14.418		-1.549			9.572			0.385											-0.14
641	13.993		-2.921			10.152			-0.181											-0.04
640	14.04		-6.797			9.641			-0.861											0.01
639	14.18		-4.906			10.29			-0.841											0.01
638	14.558		-2.831			10.063			-0.538											0.01
637	14.684		-5.964			10.095			-0.166											0.09
636	14.715		-3.059			9.763			-0.9											0.02
635	14.637		-2.122			10.036			-1.282											0.16
634	14.939		-1.288			10.059			-0.543											0.14
633	14.836		0.743			10.33			-1.416											0.06
632	14.57		0.168			9.926			-1.198											-0.03
631	14.703		0.157			9.539			-1.322											0.01
630	14.941		0.922			9.53			-0.548											0.22
629	14.978		1.733			9.533			-0.538											0.07
628	15.072		-2.26			9.131			-0.771											0.3
627	14.747		-3.202			9.866			-1.942											0.1
626	15.184		-0.595			9.723			-1.689											0.11
625	15.868		-0.053			9.79			-0.826											0.16
624	15.383		0.137			9.483			-0.647											0.13
623	15.191		-7.287			9.995			-1.456											*
622	14.57		-0.808			9.831			-0.161											0.1
621	14.929		0.355			9.18			-0.374											0.08
620	15.766		-1.809			9.889			-1.014											0.11
619	15.551		-0.34			9.271			1.04											0.03
618	15.361		1.576			8.493			0.648											0.23
617	15.366		1.684			9.205			-0.201											0.11
616	15.221		1.762			9.92			-0.747											0.02
615	15.572		-2.007			9.116			-0.781											0.12
614	15.885		-0.308			9.647			-0.434											-0.08
613	15.91		0.118			10.418			-0.776											0.17
612	15.534		1.076			9.539			-1.223											0.02
611	15.044		0.579			9.127			-0.871											0.05
610	14.939		-3.944			9.6			-1.625											-0.07
609	14.481		-1.334			9.82			-0.811											-0.13
608	14.873		-3.147			9.715			-1.565											-0.02
607	15.182		-2.747			10.122			-1.794											-0.05
606	15.959		1.738			9.734			-1.501											0.04
605	16.167		1.165			10.291			-1.506											-0.1
604	15.824		0.947			10.305			-2.081											-0.19
603	15.98		0.062			9.628			-2.429											-0.22
602	15.674		1.548			9.817			-2.121											-0.22
601	15.446		0.798			10.182			-2.91											-0.14
600	15.347		-1.052			10.122			-2.062											-0.23
599	15.212		0.493			10.008			-1.923											-0.15
598	14.983		-2.655			9.289			-2.191											-0.15
597	15.077		-0.632			10.07			-1.779											-0.31
596	14.75		-5.42			10.334			-2.067											-0.19
595	14.672		1.678			10.507			-1.461											0.09
594	14.866		2.39			9.825			-1.436											-0.58
593	15.06		2.584			9.797			-1.193											-0.31
592	14.757		1.089			9.636			-2.28											-0.11
591	15.123		0.65			10.18			-1.491											-0.11
590	14.43		-1.507			10.134			-1.278											-0.18
589	14.614		-4.429			9.927			-0.965											-0.2
588	14.771		0.578			9.991			-0.364											-0.21
587	15.319		0.119			10.215			-1.044											-0.22
586	15.368		-0.116			9.945			-1.228											-0.34
585	15.175		1.147			9.376			-1.605											-0.33
584	14.817		1.067			9.588			-1.144											-0.14
583	14.726		0.463			8.786			-0.975											-0.34
582	14.551		-3.476			9.315			-0.647											-0.35
581	14.651		-0.079			9.446			-1.332											-0.42
580	15.158		-0.052			9.408			-1.01											0.05
579	14.934		-2.891			9.475			-1.109											0.02
578	15.352		-1.362			9.623			-0.191											-0.29
577	14.96		-1.367			9.642			-1.124											-0.29
576	14.773		0.104			9.816			-0.871											0.02
575	14.53		0.132			8.889			-1.481											-0.02
574	14.483		-2.178			10.052			-1.461											-0.03
573	14.663		-3.509			10.476			-1.645											-0.16
572	14.469		-3.301			9.922			-0.99											-0.23
571	14.437		-2.22			9.905			-1.029											-0.23
570	14.677		-5.68			9.226			-0.747											-0.23
569	14.184		0.568			9.399			-0.419											-0.26
568	14.376		0.17			9.637			-1.218											-0.29
567	14.49		0.953			9.771			-1.57											-0.18
566	14.778		-0.331			9.337			-1.665											-0.29
565	14.584		-0.059			9.179			-1.729											-0.18
564	14.864		0.049			9.564			-1.605											0.02
563	14.612		-1.638			10.53			-1.625											-0.1
562	14.521		-1.348			10.411			-2.632											-0.1
561	14.953		-2.729			9.645			-1.441											-0.12
560	14.612		0.673			9.524			-0.697											0.01
559	15.165		-0.784			10.332			-0.538											0.18
558	15.56		1.65			9.552			-0.414											-0.02
557	14.551		0.929			9.756			-0.642											-0.06
556	14.425		1.749			9.302			-0.92											-0.06
555	14.399		2.225			8.999			-1.109											-0.1
554	15.009		-2.353			9.104			-1.297											-0.16
553	14.551		-1.604			9.635			-2.225											-0.17
552	14.245		-0.784			8.786			-1.739											-0.1
551	14.56		0.559			8.768			-2.22											-0.1
550	14.995		0.785			8.348			-2.349											0.03
549	14.948		-0.106			8.926			-2.945											0.03
548	15.429		-0.782			8.973			-2.116											0.14
547	15.555		-3.691			8.861			-2.057											-0.03
546	15.761		-5.95			8.751			-2.235											0.01
545	15.343		-2.106			8.524			-3.069											0.01
544	15.298		-2.421			8.539			-2.508											-0.14
543	14.974		-2.444			8.989			-2.771											0.05
542	14.857		0.872			8.132			-2.032											0.01
541	14.691		-3.963			9.3			-2.29											-0.46
540	14.887		-0.943			9.259			-2.037											-0.08
539	15.035		-1.72			9.276			-1.893											-0.09
538	15.224		-2.64			10.015			-2.121											0.03
537	15.581		-3.096			9.088			-2.573											0.03
536	15.838		-4.768			8.669			-1.526											-0.06
535	15.593		0.319			10.375			-0.836											-0.12
534	15.147		-0.138			10.086			-0.27											-0.16
533	14.911		0.037			10.085			-0.315											-0.09
532	15.025		-1.187			10.007			-0.756											-0.04
531	14.607		0.8			10.127			-1.134											-0.16
530	14.644		1.735			9.989			-0.474											-0.04
529	14.82		0.07			9.917			-1.109											-0.04
528	14.796		-1.634			9.728			-2.26											-0.2
527	14.932		-0.228			9.68			0.072											-0.14
526	14.936		0.231			9.754			-0.905											-0.12
525	14.754		0.049			9.77			-0.201											-0.2
524	15.319		-1.521			9.734			0.459											0.01
523	15.163		-0.632			9.402			0.554											-0.04
522	15.471		-2.894			8.681			-0.364											-0.18
521	15.691		0.498			10.075			-0.33											-0.04
520	15.506		-2.275			9.571			-0.657											-0.12
519	15.471		-0.195			9.754			-0.866											-0.12
518	15.044		0.566			9.969			-0.503											-0.06
517	15.45		0.115			9.814			-0.632											-0.12
516	15.168		1.879			9.255			-1.114											-0.25
515	15.158		2.364			9.314			-0.742											-0.25
514	15.004		-0.043			9.696			-1.218											-0.36
513	15.102		2.091			10.023			-0.781											-0.01
512	14.885		-0.492			9.754			-0.523											-0.1
511	15.481		-0.04			10.066			-0.652											0.18
510	14.787		-1.562			10.321			-0.027											0.05
509	14.563		0.172			9.785			-0.101											-0.05
508	15.436		-1.03			9.921			-0.369											-0.11
507	14.827		-2.569			9.375			-0.816											-0.05
506	14.957		-0.722			9.526			0.087											-0.05
505	14.694		-0.951			9.588			0.236											0.02
504	14.542		-0.256			10.438			-0.861											-0.02
503	15.149		-1.036			10.543			1.105											-0.07
502	15.324		-2.096			10.456			-1.044											-0.07
501	15.093		-3.113			11.204			-0.404											-0.02
500	15.242		-2.619			10.636			-0.151											-0.07
499	14.827		-1.808			10.632			0.157											-0.02
498	14.381		-3.894			10.207			-0.091											-0.02
497	15.006		-1.05			10.164			0.182											-0.04
496	15.235		-3.076			11.658			-0.419											-0.03
495	14.285		-4.174			10.812			-0.533											0.01
494	15.238		-0.851			11.31			0.956											0.01
493	14.595		-4.294			11.307			-0.211											0.01
492	14.493		-4.095			10.836			-0.885											-0.05
491	14.649		-0.492			10.923			-0.622											-0.05
490	14.761		1.314			10.082			-1.074											0.08
489	15.492		-0.303			9.94			-0.593											-0.03
488	15.959		-2.491			9.903			-1.014											-0.16
487	15.401		-2.576			10.501			-1.431											*
486	15.434		-3.14			9.745			-1.898											-0.22
485	15.14		-0.977			9.936			0.182											-0.03
484	15.436		-3.305			9.67			-1.332											-0.02
483	15.684		-2.516			9.824			-1.585											-0.55
482	15.614		0.317			9.493			-1.898											-0.24
481	15.607		0.242			9.282			-0.101											-0.03
480	15.609		0.882			9.063			0.033											-0.22
479	15.497		-3.266			9.432			-1.178											-0.13
478	15.546		-0.059			10.066			-1.6											-0.13
477	15.357		-1.148			10.008			-0.692											-0.16
476	15.149		1.348			9.351			-0.756											-0.28
475	15.214		0.733			9.395			-0.533											-0.1
474	14.651		0.897			9.549			-0.295											-0.21
473	14.946		-0.297			9.861			0.291											-0.12
472	14.516		0.311			9.445			-0.33											-0.22
471	14.378		1.54			9.121			-0.24											0.04
470	14.495		0.197			9.52			-0.22											-0.12
469	14.035		0.648			9.538			-0.558											0.15
468	14.315		-0.957			9.413			-0.742											-0.22
467	14.689		2.003			9.528			-1.099											-0.2
466	14.911		-0.64			9.931			-0.315											-0.26
465	15.406		1.252			9.558			-0.811											-0.26
464	15.259		0.025			9.414			-0.935											-0.1
463	15.534		0.677			9.692			-0.543											-0.06
462	15.523		1.017			9.529			-1.273											-0.22
461	15.177		-0.085			10.147			-0.915											-0.2
460	14.978		-0.288			9.517			-0.121											-0.26
459	15.298		1.693			9.25			-0.722											-0.26
458	14.752		1.024			10.404			-0.533											-0.13
457	14.894		0.713			10.668			-0.364											-0.11
456	14.49		-1.303			10.615			-0.24											-0.14
455	14.899		1.612			10.102			-0.086											-0.22
454	14.981		0.582			9.746			-0.32											-0.21
453	15.156		-1.515			11.32			-0.335											-0.35
452	14.964		-0.948			10.982			-1.074											-0.22
451	15.002		-0.024			11.405			-1.054											-0.2
450	15.284		-1.629			11.74			-0.012											-0.19
449	15.284		0.671			11.737			-1.233											-0.18
448	15.418		1.344			10.659			-0.642											0.12
447	15.121		-1.311			10.938			0.107											-0.18
446	14.717		-0.551			11.125			-0.841											-0.18
445	15.011		-2.683			10.861			-1.044											-0.2
444	15.31		-2.43			10.812			0.296											-0.26
443	14.96		-1.027			10.197			0.32											-0.04
442	14.458		0.535			10.444			0.42											-0.06
441	14.413		-0.558			9.898			-0.126
440	14.388		-1.054			9.655			-0.459
439	14.161		-3.926			9.646			-1.079
438	14.374		-0.374			10.167			-0.151
437	14.514		-3.449			10.061			-0.374
436	14.852		-0.995			10.004			-1.426
435	15.595		1.349			10.71			-0.469
434	15.198		0.529			10.756			-0.285
433	15.238		1.462			10.341			-0.359
432	15.375		-1.744			10.52			-0.751
431	15.193		-1			10.945			-1.372
430	15.058		-0.549			11.869			-0.027
429	14.843		-4.42			12.027			-0.558
428	14.399		0.514			10.809			-1.238
427	15.191		-3.355			10.594			-2.191
426	15.238		-4.318			10.464			-1.789
425	14.88		-3.262			10.272			-1.193
424	14.71		-2.717			9.801			-0.657
423	14.437		-4.346			10.295			-0.846
422	14.605		-3.936			10.036			-1.024
421	14.887		-3.409			8.93			-0.707
420	14.651		-2.892			10.118			-0.176
419	15.112		-0.822			10.713			-0.88
418	15.091		-1.332			9.923			-0.756
417	14.696		0.217			9.51			-0.851
416	15.649		-2.495			9.939			-0.766
415	15.354		-0.944			9.69			-1.923
414	15.52		0.021			9.767			-1.764
413	15.609		-1.38			9.166			-1.153
412	15.095		-0.682			10.16			-0.518
411	14.855		-2.196			10.579			-0.965
410	14.579		-4.15			10.968			-1.168
409	14.486		-2.104			10.867			-0.384
408	14.36		-1.199			10.746			-0.454
407	14.558		-1.209			11.294			-0.419
406	14.268		-0.891			11.783			-0.876
405	14.245		-1.364			10.314			-0.419
404	14.133		-3.383			11.392			-0.28
403	14.35		1.15			11.329			-1.034
402	14.941		1.572			11.373			-0.742
401	14.621		1.227			11.609			-1.218
400	14.894		-0.122			11.61			-0.488
399	14.918		-1.276			10.81			-1.689
398	15.263		-1.272			10.512			-1.516
397	16.223		-0.902			9.909			-1.397
396	15.735		-1.604			9.967			-1.967
395	15.119		-0.316			10.28			-1.332
394	15.336		0.983			9.842			-1.709
393	14.581		-3.058			9.984			-1.56
392	14.75		1.96			10.225			-1.57
391	15.074		2.444			9.903			-1.054
390	14.806		0.274			10.848			-1.848
389	15.016		-1.859			10.339			-1.704
388	15.219		-0.777			9.89			-1.461
387	15.693		-3.31			9.323			-0.285
386	14.978		1.189			9.447			-0.801
385	15.016		-1.646			9.9			-0.608
384	15.02		-0.514			9.323			-1.238
383	14.96		-2.008			9.177			-0.608
382	14.719		-4.18			9.2			-0.712
381	14.981		-5.832			9.187			-1.332
380	15.126		-1.371			9.533			-0.26
379	14.88		0.225			9.318			-0.702
378	14.992		-1.444			9.968			-1.109
377	15.053		0.429			9.846			-0.285
376	15.016		1.387			9.829			-2.503
375	14.446		1.673			9.817			-0.196
374	14.409		-2.674			10.052			-0.682
373	14.705		0.055			10.303			-0.275
372	14.75		1.107			9.209			-0.697
371	14.745		1.774			9.358			-0.608
370	14.813		-3.508			9.61			-1.451
369	14.913		-1.469			9.342			-1.977
368	14.803		-2.308			9.996			-1.446
367	15.179		-1.444			9.705			-0.915
366	15.151		-1.723			9.663			-0.756
365	15.086		-0.192			9.697			-1.67
364	14.943		0.707			10.285			-0.945
363	14.296		-0.471			9.663			-0.483
362	14.57		-1.156			9.831			-0.796
361	15.114		0.243			10.05			-0.89
360	15.107		0.655			10.086			-1.516
359	14.719		-3.883			10.216			-1.511
358	14.647		0.299			9.598			-1.585
357	14.808		0.536			9.689			-1.903
356	14.871		-1.629			9.514			-1.719
355	14.668		-1.332			9.588			-0.975
354	14.593		-0.929			9.467			-1.307
353	14.453		-1.219			9.729			-1.153
352	14.247		-1.13			9.592			-1.511
351	14.161		-3.276			9.633			-1.342
350	14.184		-0.543			8.987			-0.89
349	14.413		-2.585			9.202			-1.357
348	14.392		0.117			9.238			0.167
347	14.399		-0.183			9.055			0.375
346	14.479		-1.769			8.772			0.177
345	14.969		-4.248			8.857			-0.727
344	15.116		-0.537			8.73			-1.059
343	15.186		-3.039			8.655			-1.049
342	15.056		-2.137			9.058			-0.786
341	15.6		-0.248			8.853			-0.672
340	15.364		-3.898			8.652			-1.397
339	15.439		-2.8			8.97			-1.332
338	14.803		-3.458			9.609			-1.65
337	14.96		-2.249			9.178			-1.208
336	14.887		-0.422			8.775			-1.218
335	15.06		-2.682			9.295			-1.784
334	15.142		-0.316			9.698			-1.213
333	15.462		-2.556			9.743			-2.047
332	15.203		-0.333			9.648			-0.985
331	14.997		1.281			9.186			-0.761
330	14.948		-5.483			9.597			-1.158
329	14.637		-0.133			8.613			-1.521
328	14.715		-0.399			9.561			-1.019
327	14.943		-1.802			9.205			-1.858
326	14.754		-0.886			9.079			-1.496
325	14.841		-0.697			9.137			-0.216
324	14.934		-0.212			9.015			0.464
323	14.885		-1.169			9.188			-0.925
322	14.773		-2.423			9.628			-0.568
321	14.95		-2.905			9.715			-0.697
320	14.712		-1.394			9.607			-0.677
319	15.109		-2.021			9.304			-0.404
318	15.513		-1.884			9.581			-0.429
317	15.249		-0.25			9.539			-0.369
316	14.871		-1.941			9.147			-1.054
315	14.922		-0.974			9.732			-0.206
314	14.857		-1.504			9.477			0.167
313	14.731		-1.571			10.185			-0.508
312	14.381		-2.595			9.89			-0.349
311	14.887		-0.457			9.317			-0.359
310	14.63		-2.008			9.398			-0.627
309	14.668		-1.834			9.443			-1.243
308	15.151		-1.535			9.233			-1.144
307	15.182		-0.887			8.984			-0.429
306	15.583		0.045			9.078			-0.454
305	15.502		-1.417			9.217			-0.568
304	15.476		1.181			8.617			-0.156
303	15.656		-0.299			9.287			-0.22
302	15.707		-3.097			9.291			-0.866
301	15.497		-1.644			9.919			0.087
300	15.303		-1.033			9.675			-0.538
299	15.114		-0.416			10.242			-1.024
298	14.845		-0.62			10.242			-0.732
297	14.654		-0.388			10.184			0.186
296	14.343		-0.291			10.181			0.256
295	14.098		-1.651			10.141			0.077
294	14.135		-1.034			9.742			-0.796
293	14.023		0.029			9.561			-0.89
292	14.219		-1.549			10.192			0.296
291	14.194		0.618			9.987			-0.002
290	14.124		-3.625			9.468			-0.563
289	14.336		1.257			10.019			0.241
288	14.322		-0.024			10.747			-0.459
287	14.236		1.736			10.616			-0.156
286	14.724		-0.146			10.308			-0.057
285	14.637		-0.25			10.091			-0.077
284	14.577		0.525			10.814			-0.012
283	15.1		0.379			10.282			0.003
282	15.207		1.657			9.659			1.164
281	14.665		-2.011			9.243			0.603
280	14.759		2.557			9.376			0.003
279	14.374		1.506			9.084			0.211
278	14.458		0.101			8.936			0.623
277	14.191		0.014			9.004			0.747
276	14.096		-2.668			8.981			0.976
275	14.156		-0.563			8.872			0.435
274	14.381		-3.819			8.919			-0.553
273	14.439		-2.575			9.411			-0.548
272	14.743		0.386			9.507			-0.727
271	15.17		-2.045			9.573			-1.069
270	15.345		2.308			8.246			-1.526
269	15.074		1.227			9.207			-1.987
268	15.182		-4.398			8.739			-1.56
267	15.205		-0.439			9.429			-0.796
266	15.14		1.015			10.139			-1.372
265	15.06		1.796			9.15			-0.831
264	15.126		2.018			10.26			-1.01
263	14.691		2.048			10.194			-0.945
262	14.425		0.921			10.416			0.018
261	14.71		2.063			9.825			-0.131
260	14.745		-1.084			9.704			-1.198
259	14.376		0.973			9.862			-0.697
258	14.441		3.146			9.403			-1.129
257	14.434		0.617			9.935			0.062
256	14.264		0.345			9.984			-0.166
255	14.362		-0.106			9.804			0.325
254	14.381		-1.55			9.255			0.003
253	14.348		-0.022			9.953			-0.22
252	14.586		-2.082			10.423			0.216
251	14.581		-0.109			9.915			-1.357
250	15.039		-0.304			9.769			0.643
249	15.359		-2.514			9.682			1.258
248	15.551		0.706			10.037			0.936
247	15.516		2.549			9.214			0.519
246	15.317		1.901			10.021			0.896
245	15.268		2.297			9.964			1.268
244	15.133		0.466			9.907			-0.116
243	15.056		0.304			9.461			0.469
242	14.658		3.395			9.834			1.174
241	14.857		-0.217			9.845			0.152
240	15.368		3.03			9.947			0.881
239	16.114		0.925			9.824			1.11
238	15.665		0.217			9.384			0.201
237	15.488		-0.895			8.602			-0.265
236	15.387		-0.358			8.564			0.985
235	15.969		0.135			9.325			1.397
234	15.516		2.182			9.462			0.608
233	16.111		0.043			9.316			-0.106
232	16.079		-0.151			9.534			-0.697
231	15.614		1.817			9.185			-0.22
230	15.628		-0.027			9.295			-0.588
229	15.331		1.714			10.159			-0.111
228	15.053		0.076			9.177			-0.037
227	15.088		0.827			9.893			-0.111
226	15.189		0.459			10.392			0.742
225	15.161		1.473			10.079			0.41
224	15.226		0.008			9.669			-0.235
223	15.156		-2.348			10.007			-1.039
222	14.955		-1.232			9.4			-0.156
221	14.873		-3.709			9.364			-1.044
220	14.619		-3.402			9.789			-0.895
219	14.817		-1.58			10.137			-1.312
218	14.747		-0.861			9.412			-0.354
217	14.974		-1.835			10.103			0.335
216	14.948		0.628			10.215			-0.23
215	14.729		-1.071			10.299			-0.191
214	14.542		0.003			10.92			0.152
213	14.518		-1.315			10.683			0.365
212	15.095		-1.759			10.597			0.211
211	15.207		-3.62			10.017			-0.24
210	15.177		-0.393			10.828			-0.687
209	15.562		-3.281			10.151			0.028
208	15.836		0.541			10.127			-1.908
207	15.418		-2.381			10.234			-1.734
206	14.918		2.048			10.452			-1.431
205	14.838		0.466			10.307			-1.332
204	14.467		-4.525			10.403			-0.866
203	14.266		0.776			9.906			-1.144
202	14.771		-0.718			9.556			-0.583
201	14.563		-1.264			10.092			-0.444
200	14.476		0.023			9.676			-0.434
199	15.586		-2.881			9.834			0.33
198	15.175		-0.346			9.902			0.216
197	15.105		-3.435			9.836			1.462
196	14.542		-2.405			10.152			1.244
195	14.296		-0.188			9.545			1.08
194	14.649		-2.816			10.132			0.494
193	14.642		1.119			9.802			0.449
192	14.785		-0.472			10.308			0.524
191	14.953		-0.553			10.262			0.514
190	14.892		-2.887			10.517			0.162
189	15.268		-0.163			10.055			0.226
188	15.502		-0.099			10.176			-0.483
187	15.794		1.612			9.773			-0.9
186	15.49		-0.468			10.19			-0.712
185	14.726		-0.56			9.965			-0.037
184	14.862		-2.83			9.803			-0.285
183	14.588		-0.324			10.299			0.102
182	14.572		-3.832			10.894			0.261
181	14.668		-1.949			10.11			-0.017
180	14.684		-4.532			10.767			-1.198
179	15.109		-0.475			10.575			-1.878
178	15.319		-0.508			10.366			-1.421
177	15.242		-3.184			9.296			-1.426
176	15.051		-2.748			9.17			-1.029
175	15.312		-2.25			9.779			-0.995
174	15.511		-4.653			10.003			-1.402
173	15.562		-2.878			10.206			-1.208
172	15.301		0.579			9.906			-1.461
171	14.537		-0.721			10.098			-1.119
170	15.063		-3.674			10.769			-1.054
169	14.694		-0.044			10.264			-1.377
168	14.745		0.022			9.798			-0.776
167	14.743		-1.662			10.345			-0.791
166	14.759		-3.627			9.755			-1.158
165	14.362		-3.235			10.116			-1.044
164	14.834		-2.927			10.031			-0.88
163	15.798		-0.962			9.942			-0.657
162	16.373		-2.423			10.039			-1.655
161	16.137		0.113			10.854			-0.771
160	16.163		-2.516			10.6			-0.92
159	15.756		-2.215			10.17			-1.173
158	15.207		-2.529			10.215			-0.895
157	14.871		-1.104			10.144			-0.866
156	14.999		0.886			10.027			-1.456
155	14.88		-3.304			10.279			-1.163
154	15.235		-0.23			9.751			-0.444
153	15.039		0.719			9.461			-0.26
152	15.336		-0.832			9.419			-0.93
151	15.254		-3.83			9.46			-0.315
150	15.801		-2.538			9.325			-1.218
149	16.237		1.074			9.901			-0.474
148	15.572		-1.908			9.754			-0.95
147	15.455		0.859			9.776			0.951
146	15.128		-1.531			9.716			-0.925
145	15.775		0.564			9.882			-0.086
144	15.623		-0.994			10.45			-0.737
143	15.2		-6.884			10.997			-0.047
142	14.936		-0.841			11.263			-0.206
141	15.137		0.045			10.986			0.097
140	14.985		-0.595			11.239			0.489
139	14.999		-0.863			11.502			0.33
138	15.238		-1.252			10.528			-0.99
137	15.221		-0.379			10.705			-0.22
136	15.242		-0.242			10.171			-0.93
135	14.794		0.32			9.675			0.226
134	14.451		-4.104			10.219			0.365
133	14.698		-0.473			10.445			-0.459
132	14.668		-4.292			11.024			-0.528
131	14.99		0.141			10.076			0.082
130	14.743		1.682			9.342			-1.188
129	14.56		0.567			9.97			0.241
128	14.56		-1.497			9.854			-0.424
127	15.049		-0.909			9.983			-0.171
126	14.679		-0.967			9.73			-0.503
125	14.736		-0.1			9.531			-0.22
124	14.698		0.213			9.348			-0.985
123	14.778		-1.636			10.162			-1.079
122	14.549		-0.241			10.203			0.013
121	14.623		1.9			9.886			-0.235
120	14.509		0.852			9.997			0.246
119	14.378		-1.595			10.088			-0.603
118	14.549		0.985			10.52			-0.876
117	14.558		0.694			9.912			0.127
116	14.593		0.509			10.427			-0.34
115	14.131		0.59			10.055			0.177
114	14.395		-0.554			9.719			0.737
113	14.224		0.189			10.586			-1.059
112	14.303		-0.15			9.95			-0.335
111	14.752		1.092			9.817			-0.146
110	15.004		-4.424			10.427			-0.196
109	15.291		-0.141			10.161			-0.96
108	15.303		0.107			10.213			0.052
107	15.686		0.66			10.563			-0.345
106	16.025		0.251			10.189			-0.518
105	15.91		0.632			9.749			0.817
104	15.677		0.079			10.027			-0.28
103	15.427		-1.819			9.986			0.092
102	15.506		-1.954			9.475			0.38
101	15.086		-2.152			9.617			0.861
100	14.855		0.642			9.914			-1.01
99	15.107		1.173			10.033			-0.791
98	14.85		-1.536			9.777			-0.637
97	14.623		-0.5			9.855			-0.166
96	15.119		0.429			10.007			-0.761
95	15.219		0.134			9.595			-1.545
94	15.198		-2.461			10.209			-2.196
93	15.52		-1.472			9.9			-0.781
92	15.98		0.476			10.161			0.112
91	15.469		-0.498			9.161			0.157
90	15.481		0.244			10.117			-0.98
89	15.224		-2.828			9.884			1.124
88	15.572		-2.135			9.923			1.139
87	15.107		-0.053			9.484			0.231
86	15.205		-0.28			9.322			0.082
85	14.806		0.464			8.958			0.023
84	14.32		-0.687			9.445			-1.476
83	14.619		-0.366			9.664			-0.707
82	14.119		-0.352			9.525			-0.285
81	14.182		-4.785			9.959			-1.655
80	14.425		0.95			9.08			-1.188
79	14.236		0.659			9.477			-0.955
78	14.416		-4.361			9.322			-1.139
77	14.446		-0.437			9.151			-0.895
76	14.736		0.897			8.965			-0.429
75	14.355		-2.35			9.784			-0.027
74	14.446		-2.438			9.19			-0.593
73	14.687		-0.248			10.127			0.276
72	14.708		-2.066			9.749			0.087
71	14.773		-0.086			10.146			-0.379
70	14.453		-2.332			10.341			-0.017
69	14.451		0.586			9.843			0.266
68	14.843		-1.872			9.539			0.673
67	14.383		0.516			9.608			1.556
66	14.402		0.292			9.752			0.643
65	14.679		0.874			9.917			-0.126
64	14.792		0.673			10.345			0.048
63	15.044		0.137			10.431			-0.077
62	14.556		-2.253			9.994			0.048
61	14.539		-0.852			9.889			1.338
60	14.306		0.464			9.29			0.509
59	14.416		-3.575			10.105			-0.851
58	14.493		-0.597			9.488			0.395
57	14.628		-2.098			10.062			-1.397
56	14.588		-1.961			9.841			-0.588
55	14.226		-0.272			10.192			1.189
54	14.168		0.604			10.013			0.186
53	14.056		0.041			10.372			0.643
52	13.867		-4.144			10.623			0.742
51	13.981		-0.765			10.131			0.405
50	13.857		-1.741			10.678			0.36
49	14.051		-6.183			10.802			-0.091
48	13.82		-0.514			10.24			1.397
47	14.089		0.028			10.163			1.958
46	14.084		-4.814			10.268			1.353
45	14.367		-1.186			9.958			0.33
44	14.558		0.851			9.934			0.504
43	14.353		1.673			10.438			0.683
42	14.577		1.087			10.161			1.08
41	14.31		0.147			10.26			0.41
40	14.514		2.078			9.782			0.191
39	14.757		1.236			10.147			1.333
38	15.032		-1.635			10.54			0.717
37	14.88		0.246			10.733			0.484
36	15.013		-4.846			10.525			-0.062
35	14.621		2.21			10.83			1.174
34	15.168		1.284			10.805			-0.027
33	15.165		1.619			10.753			-0.503
32	14.999		0.942			10.964			-0.747
31	15.088		-0.183			10.614			-1.987
30	15.072		-0.407			10.078			-1.461
29	15.277		-3.434			10.623			-2.603
28	15.245		-0.105			10.771			-1.114
27	15.254		-1.78			10.957			-0.93
26	15.004		-0.328			10.21			-1.585
25	15.252		0.075			10.079			-1.163
24	15.305		-3.494			9.972			-2.364
23	15.203		0.512			10.235			-1.302
22	15.102		-1.79			9.793			-1.66
21	15.572		-0.384			9.703			-1.898
20	15.464		-0.89			9.751			-1.923
19	15.231		-0.114			9.889			-1.139
18	15.336		-0.83			9.178			-0.101
17	15.455		2.227			9.591			0.499
16	15.469		-4.691			10.155			-1.977
15	15.415		-0.541			9.801			0.048
14	16.191		0.524			9.667			0.003
[truncated: 14 more rows]
